# Supplementary material for: Varied doses and chemical forms of selenium supplementation differentially affect mouse intestinal physiology
Source: Royal Society of Chemistry journal article supplement (doi:10.1039/c9fo00278b), 2019-01-01
Supplement: c9fo00278b1.pdf [file c9fo00278b1.pdf]

# **Varied doses and chemical forms of selenium supplementation differentially affect mouse intestinal physiology**

Qixiao Zhai <sup>1,2,4#</sup>, Yue Xiao<sup>1,2#</sup>, Peng Li <sup>2,3</sup>, Fengwei Tian <sup>1,2,4</sup>, Jianxin Zhao <sup>1,2</sup>, Hao Zhang <sup>1,2,3</sup>,  
Wei Chen <sup>1,2,3,5\*</sup>

1 State Key Laboratory of Food Science and Technology, Jiangnan University, Wuxi, Jiangsu 214122, P. R. China

2 School of Food Science and Technology, Jiangnan University, Wuxi, Jiangsu 214122, P. R. China

3 National Engineering Research Center for Functional Food, Jiangnan University, Wuxi, Jiangsu 214122, P. R. China

4 International Joint Research Laboratory for Probiotics at Jiangnan University, Wuxi, Jiangsu 214122 China

5 Beijing Innovation Center of Food Nutrition and Human Health, Beijing Technology and Business University (BTBU), Beijing 100048, P. R. China

# These authors contributed equally to this work.

\* Correspondence: Wei Chen.

Tel: 86-510-85912155; Fax: 86-510-85912155

E-mail address: chenwei66@jiangnan.edu.cn

Postal address: No 1800 Lihu Avenue, Binhu District, Wuxi, Jiangsu, 214122, P.R. China

## **Supplementary materials**

### **Materials and Methods**

#### **Fecal metabolomic analysis**

#### **Sample collection and metabolite extraction**

Fresh fecal samples were collected in a 1.5-ml tube, immediately frozen in liquid nitrogen, and then stored at  $-80\text{ }^{\circ}\text{C}$ . The fecal samples

(60 mg) were mixed with 600- $\mu$ L pre-cooled mixture of methanol and ultra-pure water (4:1, v/v) and subjected to ice-based sonication (500 W; 6 s on, 6 s off) for 10 min to extract metabolites. After incubation at  $-20$  °C for 30 min, the samples were centrifuged at 13000 rpm for 15 min and the supernatant (0.2 mL) was collected for liquid chromatography-mass spectrometry (LC-MS) analysis. Quality control (QC) samples were prepared by pooling the aliquots of all samples.

### **LC-MS conditions**

The following parameters were used for LC-MS analysis. Each sample (3  $\mu$ L) was injected and separated on an Acquity BEH C18 column (100 mm  $\times$  2.1 mm i.d., 1.7  $\mu$ m; Waters, Milford, USA). The mobile phase A was 0.1% formic acid in water, and the mobile phase B was 0.1% formic acid in acetonitrile (ACN). The column was maintained at 45 °C, and the following solvent gradient was used: 5% B–25% B over 0–1.5 min, 25% B–100% B over 1.5–10.0 min, 100% B–100% B over 10.0–13.0 min, 100% B–5% B over 13.0–13.5 min, and 13.5–14.5 min holding at 5% B at a flow rate of 0.40 mL/min. The MS data were collected in a positive or negative ion mode. The gas temperature was set at 350 °C with a gas flow of 45 L/h, and data were collected from 50 to 1,000 m/z with a mass resolution of 30000.

### **Data processing and quality control settings**

The parameters of XCMS were the same as previously described.<sup>1</sup>

The variables present in at least 80% of the mice of either group were extracted, and the variables with a retention time of <0.5 min (near to the dead time) were excluded owing to the high degree of ion suppression. Variables with <30% relative standard deviation in QC samples were then retained for further multivariate data analysis. The result was a three-dimensional matrix, including retention time, m/z, sample names, and normalized ion intensities.

## **Jejunal proteomic analysis**

### **Protein extraction**

The collected jejunum samples were immediately stored at  $-80\text{ }^{\circ}\text{C}$  until the use for protein extraction. The lysis buffer (1% sodium deoxycholate, 8 M urea, and protease inhibitor) was added to the tissue samples at a ratio of 15:1. After homogenizing, the samples were kept on ice for 30 min, centrifuged at  $16000\times g$  for 30 min, and the supernatants were collected.

### **Protein sample preparation and iTRAQ labeling**

The extracted protein (100  $\mu\text{g}$  in each sample) was reduced, alkylated, hydrolysis, and labeled with iTRAQ reagents as per the instruction manual (Applied Biosystems, USA). The labeled peptides were then pooled and dried using a rotary vacuum concentrator (Christ RVC 2-25, Christ, Germany). Each sample was labeled with one of eight

iTRAQ reagents. The iTRAQ experiment was performed with six replicates (three biological replicates  $\times$  two mechanical replicates in MS runs). Notably, each tube contained a mixture of jejunum tissues from three individuals, thus providing information of nine mice from each group (the Se-D, 0.15-SeL, 0.40-SeL, 0.15-SeM, and 0.40-SeM groups). Equal volumes of aliquots from 15 samples were mixed and labeled with 121 (Fig. 1) and served as an intermediate to interact the samples in three separate 8-plex iTRAQ labeling sets.

### **LC/LC–MS/MS analysis**

The peptides were separated by high-pH reversed-phase liquid chromatography (RPLC, Waters ACQUITY UPLC) with ACQUITY UPLC BEH C18 Column 1.7  $\mu\text{m}$ , 2.1 mm  $\times$  150 mm (Waters, USA). The solvents A and B were 2% ACN (adjusted to pH 10 by ammonia) and 80% ACN (adjusted to pH 10 by ammonia), respectively. The gradient elution was performed as follows: t = 0–2 min, 0% B; t = 17 min, 3.8% B; t = 35 min, 24% B; t = 38 min, 30% B; t = 39 min, 43% B; t = 40 min, 100% B; t = 46 min, 0% B; t = 66 min, stop. LC-MS/MS analyses of all of the collected fractions were performed using an EASY-nLC 1200 system (Thermo Scientific) connected to a Q Exactive mass spectrometer (Thermo Fisher Scientific, USA). A peptide sample was loaded onto the C18 column (75  $\mu\text{m}$   $\times$  25 cm, Thermo, USA). The solvents A and B used for separation were 2% ACN containing 0.1% formic acid and 80% ACN

containing 0.1% formic acid, respectively. The gradient elution was performed as follows: t = 0, 0% B; t=1, 5% B; t = 63, 23% B; t = 88, 48% B; t = 89, 100% B; t = 95, 100% B; t = 100, 0% B; t = 120, 0% B.

The Q Exactive mass spectrometer was operated in the data-dependent mode to switch automatically between MS and MS/MS acquisition modes. Survey full-scan MS spectra (m/z 350 to 1300) were acquired with a mass resolution of 70 K, followed by MS/MS scans with a resolution of 17.5 K.

## References

1. Y. Xiao, Q. Zhai, G. Wang, X. Liu, J. Zhao, F. Tian, H. Zhang, and W. Chen, Metabolomics analysis reveals heavy metal copper-induced cytotoxicity in HT-29 human colon cancer cells, *RSC Adv.*, 2016, **6**, 78445-78456.

## Figures

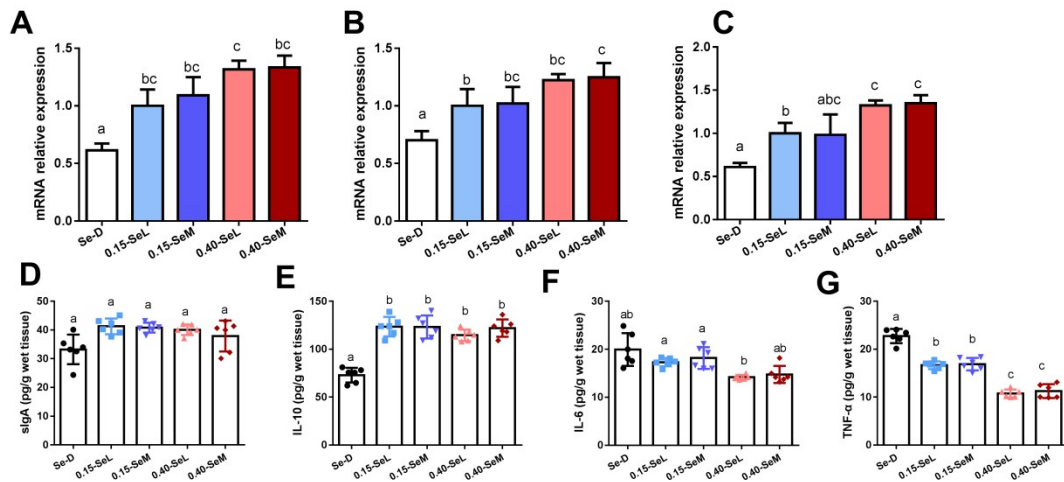

**Fig. S1** Effects of different Se supplementations on the intestinal barrier and immune responses in the colon of normal mice. (A–C) mRNA expression levels of ZO-1 (A), occludin (B), and claudin-1 (C) in the colon of the mice. (D–G) Immune responses-related biomarkers, including sIgA (D), IL-10 (E), IL-6 (F), and TNF- $\alpha$  (G), in the colon of the mice. Values are the mean  $\pm$  SD of six mice per group. Significant differences ( $P < 0.05$ ) between the groups are indicated with different letters above the bars.

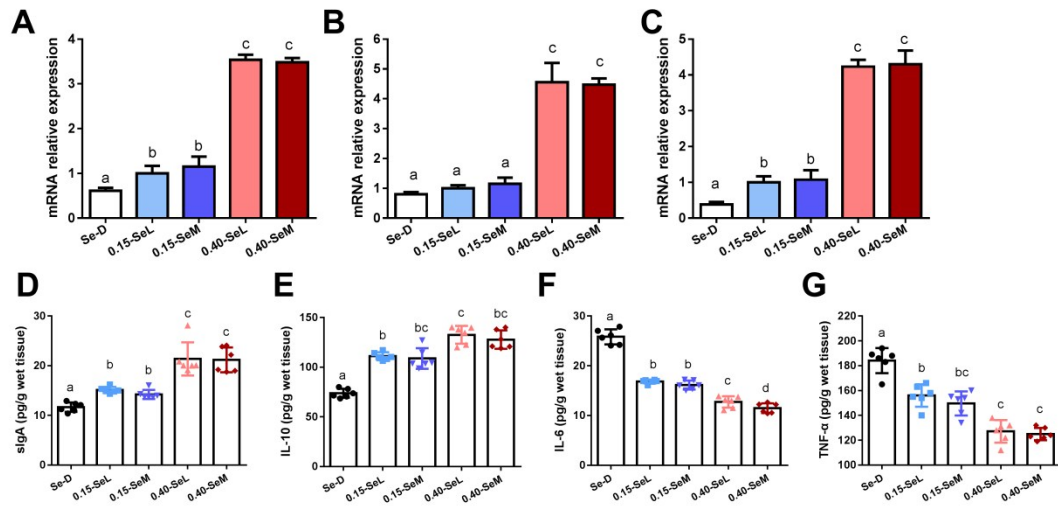

**Fig. S2** Effects of different Se supplementations on the intestinal barrier and immune responses in the colon of DSS-treated mice. (A–C) mRNA expression levels of ZO-1 (A), occludin (B), and claudin-1 (C) in the colon of the mice. (D–G) Immune responses-related biomarkers including sIgA (D), IL-10 (E), IL-6 (F), and TNF- $\alpha$  (G), in the colon of the mice. Values are the mean  $\pm$  SD of six mice per group. Significant differences ( $P < 0.05$ ) between the groups are indicated with different letters above the bars.

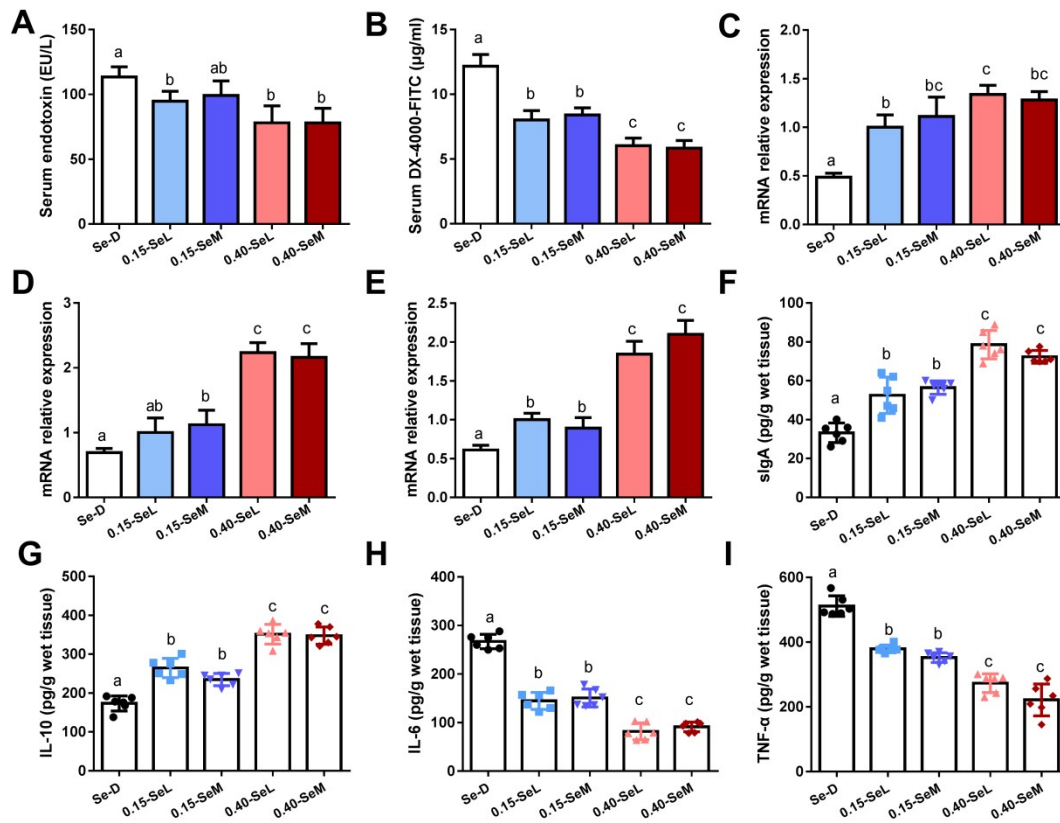

**Fig. S3** Effects of different Se supplementations on the intestinal barrier and immune responses in the jejunum of ST-treated mice. (A) Serum endotoxin levels in the mice ( $n = 8$ ). (B) Serum DX-4000-FITC levels in the mice ( $n = 8$ ). (C–E) mRNA expression levels of ZO-1 (C), occludin (D), and claudin-1 (E) in the jejunum of the mice. (F–I) Immune response-related biomarkers, including sIgA (F), IL-10 (G), IL-6 (H), and TNF- $\alpha$  (I), in the jejunum of the mice ( $n = 6$ ). Values are the mean  $\pm$  SD of six or eight mice per group. Significant differences ( $P < 0.05$ ) between the groups are indicated with different letters above the bars.



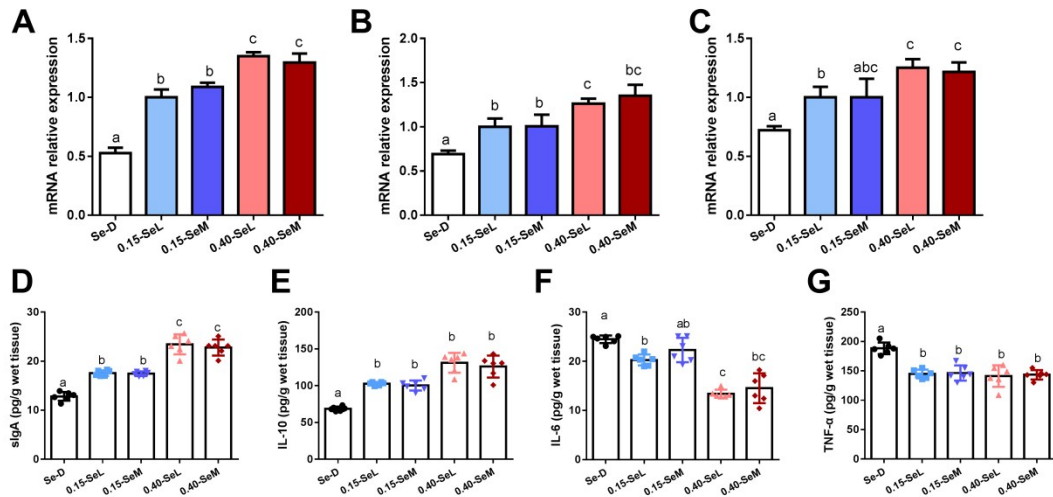

**Fig. S4** Effects of different Se supplementations on the intestinal barrier and immune responses in the colon of ST-treated mice. (A–C) mRNA expression levels of ZO-1 (A), occludin (B), and claudin-1 (C) in the colon of the mice. (D–G) Immune response-related biomarkers, including sIgA (D), IL-10 (E), IL-6 (F), and TNF- $\alpha$  (G) in the colon of the mice. Values are the mean  $\pm$  SD of six mice per group. Significant differences ( $P < 0.05$ ) between the groups are indicated with different letters above the bars.

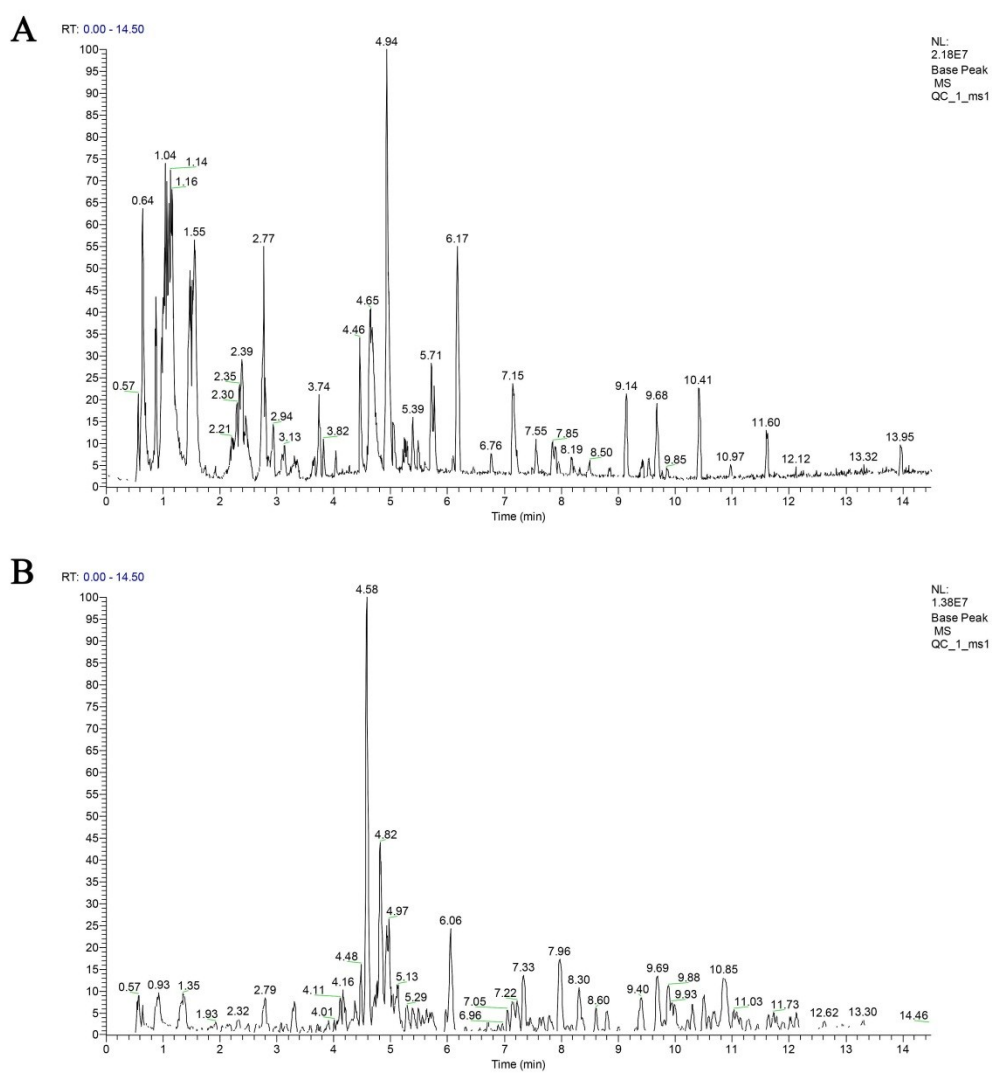

**Fig. S5** Representational base peak intensity (BPI) chromatograms derived for the fecal metabolomic analysis by UPLC/MS under positive (A) and negative (B) ion modes.

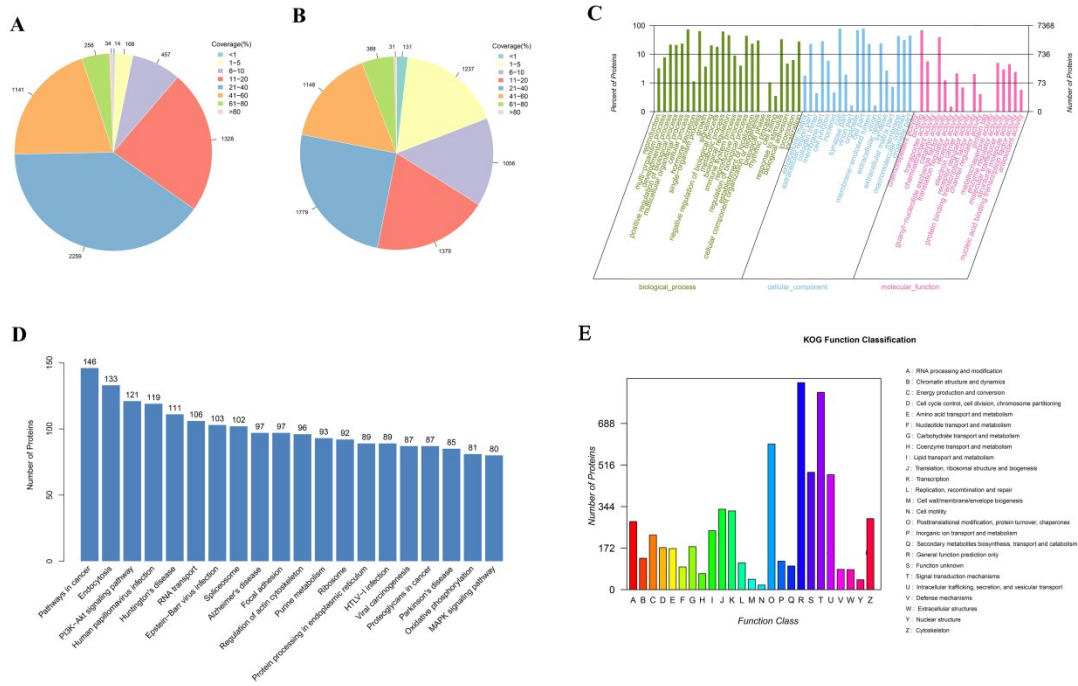

**Fig. S6** Function overview of all of the proteins identified in the jejunal proteomic analysis. (A and B) Protein coverage in the first MS run (A) and the second MS run (B). (C–E) GO (C), KEGG (D) and KOG (E) analyses of all 4446 proteins identified in the different Se supplementation groups.

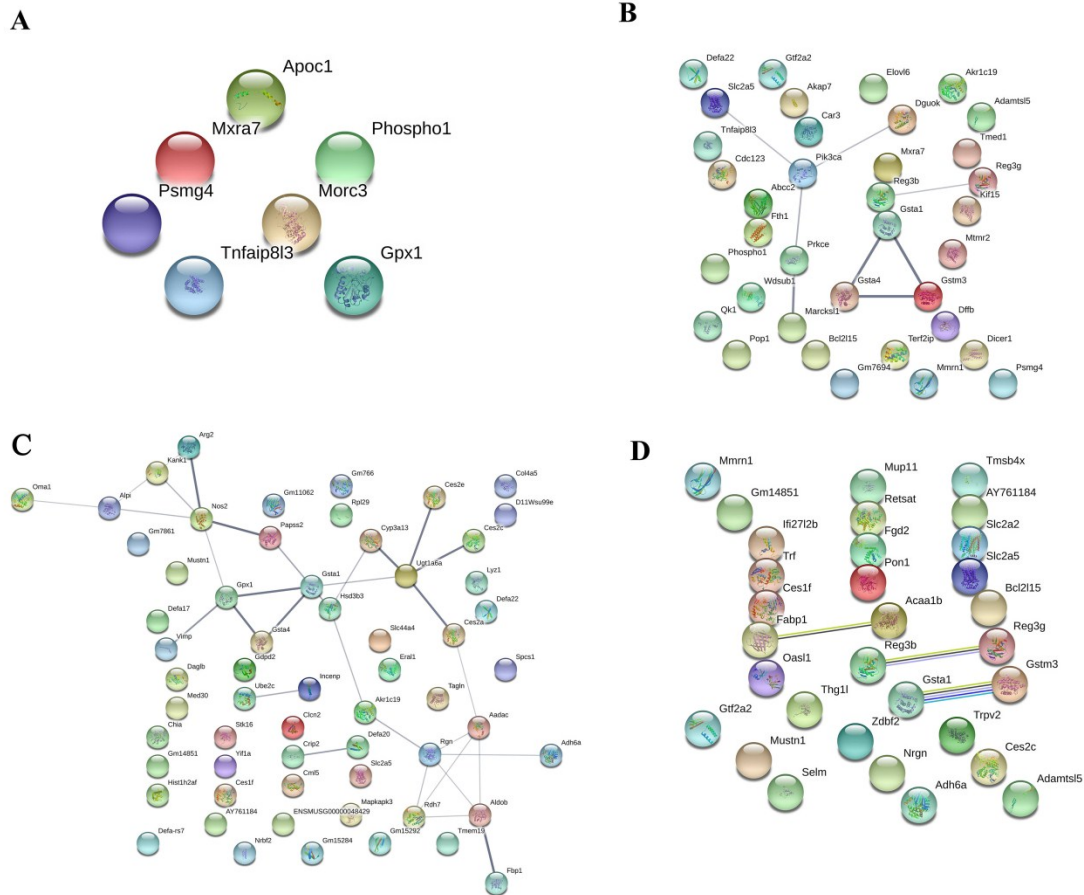

**Fig. S7** Protein–protein interaction networks for the Se-D/0.15-SeL (A), 0.40-SeL/0.15-SeL(B), Se-D/0.15-SeM (C), and 0.40-SeM/0.40-SeL (D) comparisons. The networks were constructed based on the differentially expressed proteins using the string tool. Edges represent protein–protein associations. These associations are meant to be specific and meaningful, i.e., proteins jointly contribute to a shared function. The meaning of different line colors is as follows: —, from curated databases; —, experimentally determined; —, gene neighborhood; —, gene fusions; —, gene co-occurrence; —, text mining; —, co-expression; —, protein homology.

## Tables

**Table S1 Effects of different Se supplementations on the body weight of mice**

| Body weight (g) |              |
|-----------------|--------------|
| Se-D            | 23.15 ± 0.69 |
| 0.15-SeL        | 24.87 ± 1.22 |
| 0.15-SeM        | 24.89 ± 1.71 |
| 0.40-SeL        | 25.10 ± 1.01 |
| 0.40-SeM        | 24.33 ± 0.59 |

Values are the mean ± SD of 15 mice per group.

**Table S2 Significantly altered fecal metabolites in the Se-D/0.15-SeL comparison**

| Super-pathway        | Sub-pathway                   | Metabolites                                                                                                                    | VIP value | FC <sup>a</sup> | P value <sup>b</sup> |
|----------------------|-------------------------------|--------------------------------------------------------------------------------------------------------------------------------|-----------|-----------------|----------------------|
| Bile acid metabolism |                               | Bilirubin                                                                                                                      | 1.11198   | 4.745319        | 0.037719             |
|                      |                               | 12alpha-Hydroxy-5beta-cholesterol-3-en-24-oic Acid                                                                             | 4.2154    | 2.022339        | 0.045407             |
|                      |                               | glycochenodeoxycholic acid 7-sulfate                                                                                           | 1.40734   | 0.467824        | 0.002994             |
|                      |                               | Glycocholic acid 3-glucuronide                                                                                                 | 2.39999   | 0.018521        | 0.006336             |
| Neurosubstances      |                               | Serotonin                                                                                                                      | 1.13435   | 0.39575         | 1.5E-06              |
|                      |                               | Ecgonine methyl ester                                                                                                          | 6.51579   | 0.197386        | 1.03E-05             |
|                      |                               | Nervonic acid                                                                                                                  | 6.56631   | 4.09234         | 0.000712             |
|                      |                               | Melatonin                                                                                                                      | 1.92426   | 0.331674        | 2.73E-05             |
| Vitamins             | Vitamin D                     | 4,4-difluorovitamin D3 / 4,4-difluorocholecalciferol                                                                           | 2.70592   | 4.830988        | 0.000162             |
|                      |                               | 24,24-difluoro-1alpha,25-dihydroxy-26,27-dimethylvitamin D3 / 24,24-difluoro-1alpha,25-dihydroxy-26,27-dimethylcholecalciferol | 2.10573   | 3.648916        | 0.000719             |
|                      |                               | 26,26,26-trifluoro-25-hydroxy-27-norvitamin D3 / 26,26,26-trifluoro-25-hydroxy-27-norcholecalciferol                           | 1.00309   | 2.286718        | 2.21E-06             |
|                      | Vitamin B6                    | Pyridoxamine                                                                                                                   | 1.41104   | 0.263022        | 0.000448             |
| Amino acids          | Lysine                        | Epsilon-(gamma-Glutamyl)-lysine                                                                                                | 2.38557   | 0.269455        | 0.00184              |
|                      | Histidine                     | N-palmitoyl histidine                                                                                                          | 1.01284   | 0.473089        | 0.044666             |
|                      | Tryptophan metabolism         | Indoleacetic acid                                                                                                              | 1.41296   | 0.427967        | 0.0096               |
|                      | Isoleucine                    | N-oleoyl isoleucine                                                                                                            | 1.18324   | 0.409617        | 0.00013              |
|                      | Tryptophan metabolism         | Indolelactic acid                                                                                                              | 3.43422   | 0.402127        | 1.89E-06             |
|                      | Histidine                     | L-Histidine                                                                                                                    | 1.52805   | 0.257568        | 0.003078             |
|                      | Sulfur containing amino acids | N-oleoyl methionine                                                                                                            | 1.08236   | 4.554149        | 0.003284             |
|                      |                               | 5-Methyltetrahydrofolic acid                                                                                                   | 3.60857   | 0.130514        | 0.005641             |
| Glycine              | N-oleoyl glycine              | 1.03021                                                                                                                        | 2.649554  | 0.000279        |                      |

|                                      |                                                          |                                               |          |          |          |
|--------------------------------------|----------------------------------------------------------|-----------------------------------------------|----------|----------|----------|
|                                      | Arginine biosynthesis                                    | N-Acetylmethionine                            | 2.12362  | 0.253828 | 3.4E-07  |
|                                      | Homoserine                                               | N-(3S-hydroxy-butanoyl)-homoserine lactone    | 2.89208  | 0.198993 | 0.001318 |
|                                      |                                                          | N-butanoyl-homoserine lactone                 | 5.76281  | 0.400755 | 6.3E-07  |
|                                      |                                                          | N-heptanoyl-homoserine lactone                | 7.59261  | 0.161339 | 0.00208  |
| Fatty acids                          | Long chain unsaturated fatty acids and their derivatives | Lesquerolic acid                              | 8.89117  | 0.436771 | 0.004373 |
|                                      |                                                          | 22-tricosenoic acid                           | 7.76763  | 4.504038 | 0.000119 |
|                                      |                                                          | 24-hydroxy-10Z-tetracosenoic acid             | 8.60159  | 2.808366 | 0.000986 |
|                                      |                                                          | 2-propyl-9Z-octadecenoic Acid                 | 3.26708  | 6.7815   | 8.63E-05 |
|                                      |                                                          | Mycolipenic acid (C25)                        | 9.34617  | 3.653569 | 0.000737 |
|                                      |                                                          | 28:3(5Z,9Z,21Z)                               | 1.45931  | 2.062528 | 2.07E-05 |
|                                      |                                                          | 25:2(5Z,9Z)(23Me)                             | 2.56801  | 3.173515 | 0.004754 |
|                                      |                                                          | 6-bromo-docosa-5E,9Z-dienoic acid             | 1.2372   | 0.342756 | 0.008136 |
|                                      | Long chain saturated fatty acids and their derivatives   | 12-bromo-octadecanoic acid                    | 1.43854  | 0.381267 | 1.31E-06 |
|                                      |                                                          | 2-hydroxy-tricosanoic acid                    | 3.38175  | 4.029593 | 9.95E-05 |
|                                      |                                                          | Heptadecanoic acid                            | 6.13827  | 3.398736 | 8.1E-05  |
|                                      |                                                          | 24-hydroxy-tetracosanoic acid                 | 4.51481  | 3.185718 | 0.00083  |
|                                      |                                                          | Pristanic acid                                | 3.7659   | 2.835295 | 0.003092 |
|                                      |                                                          | 2-oxo-tricosanoic acid                        | 1.05847  | 2.68558  | 0.02811  |
|                                      |                                                          | Pentadecanoic acid                            | 1.82315  | 2.297082 | 0.00514  |
|                                      | Medium chain fatty acids and their derivatives           | 9R,10S-dihydroxy-stearic acid                 | 4.27656  | 2.07132  | 0.000126 |
|                                      |                                                          | N-(6-aminohexanoyl)-6-aminohexanoic acid      | 6.29186  | 0.135088 | 0.000545 |
| 5-oxo-7-octenoic acid                |                                                          | 2.50475                                       | 0.419555 | 0.023825 |          |
| Diprotic acids and their derivatives | 2-amino-8-oxo-9,10-epoxy-decanoic acid                   | 9.71078                                       | 0.128726 | 1.77E-05 |          |
|                                      | Eicosanedioic acid                                       | 1.2935                                        | 7.745093 | 7.84E-05 |          |
| Carbohydrate metabolism              |                                                          | 5-Hydroxy-7,8-dimethoxyflavanone 5-rhamnoside | 1.30968  | 0.342789 | 0.026159 |
|                                      |                                                          | dihydrophaseic acid 4-O-beta-D-glucoside      | 2.13498  | 2.427102 | 0.009372 |
| Antibiotics                          | Antibiotics                                              | 10-Deoxymethymycin                            | 2.53523  | 3.62771  | 0.001756 |
| Alkanes/<br>Hydrocarbons             |                                                          | 6Z,9Z-Docosadiene                             | 1.89508  | 6.124374 | 6.88E-05 |
|                                      |                                                          | 9,10-Epoxy-3Z,6Z-tricosadiene                 | 2.76506  | 3.86578  | 0.001263 |
| Alcohols                             |                                                          | Nitenin                                       | 1.16588  | 14.96872 | 1.25E-07 |
|                                      |                                                          | 2,6,8,12-Tetramethyl-2,4-tridecadien-1-ol     | 3.19284  | 3.405357 | 9.61E-05 |
|                                      |                                                          | 6Z-Heneicosen-11-ol                           | 4.9172   | 3.378709 | 0.000101 |
|                                      |                                                          | Panaxydol chlorohydrine                       | 1.16224  | 2.908549 | 0.005501 |
|                                      |                                                          | 11Z-eicosen-1-ol                              | 1.17022  | 2.353323 | 0.022243 |
|                                      |                                                          | 9-pentadecen-1-ol                             | 9.26866  | 2.131542 | 0.000147 |
|                                      |                                                          | 6-Ketoestriol                                 | 1.0418   | 0.015055 | 0.003897 |
| Aldehydes                            |                                                          | 2-dodecenal                                   | 2.85319  | 9.697252 | 3.39E-05 |
|                                      |                                                          | 10Z-Nonadecenal                               | 1.41385  | 2.823455 | 0.003212 |
|                                      |                                                          | 2-decene-4,6,8-trien-1-al                     | 1.46591  | 0.262492 | 0.001964 |
| Lipid metabolism                     | Lipid biosynthesis                                       | Dodecanoylcarnitine                           | 4.33506  | 2.253399 | 4.7E-05  |
|                                      | Glycerophospholipids metabolism                          | PA(13:0/20:3(8Z,11Z,14Z))                     | 1.59048  | 4.693227 | 7.44E-07 |

|  |                            |                                                             |         |          |          |
|--|----------------------------|-------------------------------------------------------------|---------|----------|----------|
|  |                            | PE(14:0/20:1(11Z))                                          | 4.20449 | 2.440155 | 0.000628 |
|  |                            | PC(15:0/18:3(6Z,9Z,12Z))                                    | 1.13902 | 2.397449 | 0.00973  |
|  |                            | PS(16:0/16:0)                                               | 1.32945 | 2.283652 | 0.01178  |
|  |                            | PE(14:0/P-18:0)                                             | 1.01992 | 2.160331 | 0.000106 |
|  |                            | PG(13:0/22:0)                                               | 1.11037 | 2.086772 | 0.0098   |
|  |                            | CPA(18:0)                                                   | 1.14    | 0.492719 | 0.009228 |
|  |                            | PC(P-17:0/0:0)                                              | 2.15012 | 0.474005 | 0.000155 |
|  |                            | PS(O-16:0/18:2(9Z,12Z))                                     | 2.74271 | 0.430267 | 1.49E-05 |
|  |                            | PA(22:1(11Z)/0:0)                                           | 1.46916 | 0.417669 | 0.014856 |
|  |                            | PE(O-16:0/15:0)                                             | 3.09194 | 0.407563 | 6.83E-05 |
|  |                            | PG(O-18:0/20:3(8Z,11Z,14Z))                                 | 1.67542 | 0.404793 | 0.000989 |
|  |                            | LysoPC(P-18:0)                                              | 2.09968 | 0.394092 | 0.002952 |
|  |                            | PC(O-14:0/15:0)                                             | 8.75641 | 0.381714 | 3.62E-05 |
|  |                            | PG(22:6(4Z,7Z,10Z,13Z,16Z,19Z)/22:6(4Z,7Z,10Z,13Z,16Z,19Z)) | 2.29949 | 0.38032  | 0.006239 |
|  |                            | PS(15:0/0:0)                                                | 1.40393 | 0.371359 | 4.74E-05 |
|  |                            | PI(O-16:0/0:0)                                              | 5.982   | 0.367007 | 0.000117 |
|  |                            | PC(O-16:0/0:0)                                              | 5.83258 | 0.341182 | 0.007486 |
|  |                            | PG(10:0/10:0)                                               | 2.05919 | 0.280087 | 5.58E-05 |
|  |                            | PG(O-16:0/19:1(9Z))                                         | 1.03657 | 0.246507 | 0.000655 |
|  |                            | PI(16:0/0:0)                                                | 1.00255 | 0.22227  | 8.69E-06 |
|  |                            | PI(13:0/20:5(5Z,8Z,11Z,14Z,17Z))                            | 1.19969 | 0.20191  | 0.000199 |
|  |                            | PG(O-16:0/17:2(9Z,12Z))                                     | 1.52326 | 0.156852 | 0.008711 |
|  |                            | PC(O-14:0/16:0)                                             | 4.12867 | 0.325234 | 0.000118 |
|  | Cholesterol                | Cholest-5-ene                                               | 2.68411 | 2.774294 | 0.000687 |
|  |                            | 24-norcholesterol                                           | 1.50111 | 2.072878 | 0.000222 |
|  |                            | 15,20-dihydroxycholest-4,14-dien-3,16-dione                 | 1.67285 | 2.067256 | 0.001343 |
|  |                            | cholesteryl beta-D-glucoside                                | 2.30224 | 0.335648 | 0.004005 |
|  | Isoprenoids                | Gibberellin A20                                             | 1.9875  | 2.019044 | 2.58E-05 |
|  |                            | Gibberellin A9                                              | 1.94777 | 0.022024 | 0.000181 |
|  |                            | Ngaione (-)                                                 | 1.46783 | 2.01645  | 2.78E-07 |
|  |                            | 20:2(5Z,9Z)(11Me,15Me,19Me)                                 | 1.42664 | 10.46879 | 0.000186 |
|  | Glycerolipids              | DG(17:2(9Z,12Z)/22:5(7Z,10Z,13Z,16Z,19Z)/0:0)[iso2]         | 1.22941 | 3.943995 | 0.000146 |
|  |                            | DG(17:2(9Z,12Z)/22:4(7Z,10Z,13Z,16Z)/0:0)[iso2]             | 3.09315 | 2.136885 | 0.000166 |
|  | Sphingolipids/ sphingosine | Cer(d18:0/14:0)                                             | 1.2145  | 13.27052 | 6.62E-06 |
|  |                            | Cer(d18:0/15:0)                                             | 2.47798 | 6.446123 | 3.42E-05 |
|  |                            | Cer(d18:1/14:0)/N-myristoylsphingosine                      | 1.51562 | 3.079244 | 0.00064  |
|  |                            | C19 Sphingosine-1-phosphate                                 | 1.89247 | 0.485883 | 0.001837 |
|  |                            | C16 Sphinganine-1-phosphate                                 | 3.59881 | 0.278316 | 0.002839 |
|  |                            | Cer(d16:1/17:0)                                             | 3.55825 | 2.734519 | 0.001128 |
|  |                            | Cer(d18:0/h17:0)                                            | 6.58307 | 2.564602 | 1.3E-05  |
|  |                            | Cer(d18:2/14:0)                                             | 1.20976 | 0.436225 | 0.001242 |

|            |                                                     |                                                                          |         |          |          |
|------------|-----------------------------------------------------|--------------------------------------------------------------------------|---------|----------|----------|
|            |                                                     | Cer(t18:0/16:0)                                                          | 4.95114 | 3.262675 | 1.8E-05  |
|            | Phosphocholine                                      | PC(O-14:0/O-1:0)                                                         | 1.89092 | 0.474855 | 0.037794 |
|            |                                                     | PC(O-18:0/O-2:0)                                                         | 1.23818 | 0.484419 | 0.006597 |
|            |                                                     | PC(O-16:0/O-1:0)                                                         | 1.91994 | 0.392796 | 0.001452 |
|            |                                                     | PC(O-8:0/O-8:0)                                                          | 2.18348 | 0.332826 | 0.008113 |
|            | Steroids/ Sterols                                   | 3-O-(Rhaa1-4(Rhaa1-2)Glc)-26-O-(Glc)-(25R)-furost-5-en-3beta,22,26-triol | 1.75721 | 0.159756 | 0.00476  |
|            |                                                     | Campestanol                                                              | 2.60135 | 11.07493 | 0.000625 |
|            |                                                     | Campesterol                                                              | 1.48666 | 8.934155 | 8.87E-08 |
|            |                                                     | 1,3,5(10)-estratrien-17-one-3,7,8-triol                                  | 1.86366 | 0.01813  | 0.000404 |
|            |                                                     | Tetrahydrodeoxycorticosterone                                            | 1.83304 | 2.171491 | 0.01987  |
|            |                                                     | 6beta-hydroxytestosterone                                                | 1.24158 | 0.013943 | 4.68E-07 |
| Incretions |                                                     | Androsterone sulfate                                                     | 1.55082 | 2.884155 | 1.78E-06 |
|            |                                                     | Nandrolone                                                               | 1.42475 | 6.006259 | 0.001427 |
| Ketones    |                                                     | 3-Geranyl-4,2',4',6'-tetrahydroxy-5-prenyldihydrochalcone                | 1.65874 | 24.35876 | 6.77E-06 |
|            |                                                     | 2-Pyrrolidinone                                                          | 1.12122 | 0.473508 | 4.39E-08 |
|            |                                                     | Grandiflorone                                                            | 1.36872 | 0.02504  | 0.000146 |
|            |                                                     | Distemonanthin                                                           | 1.11748 | 0.014495 | 0.009956 |
| Esters     |                                                     | (Z)-5-Dodecenyl (Z)-5-dodecenoate                                        | 2.01674 | 9.420365 | 5E-05    |
|            |                                                     | (E,E)-3,7,11-Trimethyl-2,6,10-dodecatrienyl decanoate                    | 2.54595 | 10.77435 | 6.47E-05 |
| Others     | Diphenyl ethers, biphenyls, dibenzyls and stilbenes | Batatasin IV                                                             | 1.04961 | 0.289258 | 0.011858 |
|            |                                                     |                                                                          |         |          |          |
|            | Amines                                              | N,N-(2,2-dihydroxy-ethyl) arachidonoyl amine                             | 1.13419 | 20.53557 | 0.04273  |
|            | Antioxidants                                        | Gambiriin C                                                              | 1.04196 | 2.013454 | 0.011259 |
|            |                                                     | Pandaroside B                                                            | 1.90952 | 2.414363 | 0.001172 |
|            |                                                     | punaglandin 6                                                            | 1.02293 | 0.018538 | 0.012134 |

<sup>a</sup>The difference in the abundance of each metabolite is expressed as the ratio of its average content in the Se-D group and in the 0.15-SeL group (Se-D/0.15-SeL). A ratio of >1 indicates that the corresponding metabolite had higher abundance in the Se-D group, whereas a ratio of <1 indicates that the corresponding metabolite has lower abundance in the Se-D group. <sup>b</sup>Differences in metabolite abundances between the Se-D and 0.15-SeL groups were analyzed using one-way analysis of variance, followed by the Tukey's post hoc test.  $P < 0.05$  was considered as significant.

**Table S3 Significantly altered fecal metabolites in the 0.40-SeL/0.15-SeL comparison**

| Super-pathway        | Sub-pathway | Metabolites                                                                   | VIP value | FC <sup>a</sup> | P value <sup>b</sup> |
|----------------------|-------------|-------------------------------------------------------------------------------|-----------|-----------------|----------------------|
| Bile acid metabolism |             | Bilirubin                                                                     | 1.08297   | 2.458061        | 0.016425             |
|                      |             | Chenodeoxycholic acid                                                         | 1.19666   | 3.887948        | 0.013919             |
|                      |             | 24-Nor-5beta-chol-22-ene-3alpha,6alpha-diol                                   | 3.17098   | 3.377215        | 0.018269             |
|                      |             | 3alpha,7alpha,12alpha-trihydroxy-27-carboxymethyl-5beta-cholestan-26-oic acid | 1.5037    | 3.365941        | 0.020076             |
|                      |             | 24-Nor-5beta-cholane-3alpha,12alpha,23-triol                                  | 3.82275   | 3.408076        | 0.02382              |
|                      |             | 3alpha,7alpha,12alpha-trihydroxy-5alpha-cholan-24-yl sulfate                  | 1.00305   | 0.074988        | 0.01217              |
|                      |             | Sulfolithocholic acid                                                         | 3.59121   | 0.00108         | 0.00873              |
|                      |             | glycochenodeoxycholic acid 7-sulfate                                          | 3.03942   | 0.061459        | 3.12E-09             |



|                  |                                                      |                                                                                                      |         |          |          |
|------------------|------------------------------------------------------|------------------------------------------------------------------------------------------------------|---------|----------|----------|
| Vitamins         | Vitamin D                                            | 26,26,26-trifluoro-25-hydroxy-27-norvitamin D3 / 26,26,26-trifluoro-25-hydroxy-27-norcholecalciferol | 1.76064 | 0.30828  | 0.000804 |
|                  |                                                      | EB 1213                                                                                              | 1.09812 | 2.235743 | 0.004502 |
|                  |                                                      | 1alpha,25-dihydroxy-21-nor-20-oxavitamin D3 / 1alpha,25-dihydroxy-21-nor-20-oxacholecalciferol       | 2.71579 | 3.213566 | 0.032692 |
| Amino acids      | Tryptophan metabolism                                | Indoleacetic acid                                                                                    | 2.15971 | 0.351225 | 0.002943 |
|                  | Serine                                               | N-(3-(15-methyl-hexadecanoyloxy)-13-methyl-tetradecanoyl)-L-serine                                   | 1.13968 | 0.402032 | 0.002639 |
|                  | Histidine                                            | N-palmitoyl histidine                                                                                | 1.39359 | 0.453366 | 0.031709 |
| Fatty acids      | Long chain unsaturated fatty acids and its derivates | 14,15-DiHETrE                                                                                        | 1.95475 | 2.281614 | 0.000662 |
|                  |                                                      | 6-bromo-tricosa-5E,9Z-dienoic acid                                                                   | 1.07012 | 0.336338 | 0.002261 |
|                  |                                                      | 9,13-dihydroxy-10-ethoxy-11-octadecenoic acid                                                        | 1.17065 | 0.435093 | 0.041427 |
|                  | Medium chain fatty acids and their derivates         | N-(6-aminohexanoyl)-6-aminohexanoic acid                                                             | 4.50026 | 3.442128 | 0.04882  |
|                  | Diprotic acids and their derivates                   | 2-hydroxy-decanedioic acid                                                                           | 3.73184 | 0.05955  | 0.044194 |
|                  |                                                      | Pimelic acid                                                                                         | 1.29148 | 0.07723  | 0.012374 |
|                  | Short chain fatty acid and their derivatives         | Mevalonic acid                                                                                       | 2.22795 | 0.339121 | 0.004308 |
| Lipid metabolism | Cholesterol and derivatives                          | Cholesterol glucuronide                                                                              | 1.42708 | 6.74064  | 5.02E-08 |
|                  | Phosphocholine                                       | PC(O-16:0/O-2:0)                                                                                     | 1.27788 | 0.268227 | 0.001154 |
|                  |                                                      | PC(8:0/0:0)                                                                                          | 1.60281 | 0.21713  | 0.003671 |
|                  |                                                      | PC(16:0/2:0)                                                                                         | 2.71234 | 2.750722 | 0.006302 |
|                  |                                                      | PC(O-14:0/O-1:0)                                                                                     | 3.07215 | 0.345473 | 0.007596 |
|                  |                                                      | PC(O-8:0/O-8:0)                                                                                      | 2.4164  | 0.488431 | 0.047821 |
|                  | Glycerophospholipids                                 | PG(16:1(9Z)/22:2(13Z,16Z))                                                                           | 1.78403 | 2.509152 | 1.1E-08  |
|                  |                                                      | PS(16:0/16:0)                                                                                        | 2.06037 | 2.047363 | 3.02E-07 |
|                  |                                                      | PG(18:0/18:1(11Z))                                                                                   | 7.14413 | 2.767204 | 9.96E-07 |
|                  |                                                      | PG(14:0/20:3(8Z,11Z,14Z))                                                                            | 1.38747 | 2.94259  | 1.18E-06 |
|                  |                                                      | PS(16:0/18:1(9Z))                                                                                    | 7.00115 | 3.430207 | 1.81E-06 |
|                  |                                                      | PG(18:0/0:0)                                                                                         | 3.5555  | 0.340466 | 2.51E-06 |
|                  |                                                      | PI(12:0/19:0)                                                                                        | 1.63818 | 4.183373 | 2.69E-06 |
|                  |                                                      | PS(O-16:0/18:3(9Z,12Z,15Z))                                                                          | 2.58142 | 7.489005 | 3.13E-06 |
|                  |                                                      | PE(14:0/P-18:0)                                                                                      | 1.56137 | 2.437515 | 5.65E-06 |
|                  |                                                      | PA(22:0/12:0)                                                                                        | 2.31638 | 2.13532  | 6.84E-06 |
|                  |                                                      | PG(20:2(11Z,14Z)/0:0)                                                                                | 2.48212 | 7.221531 | 7.08E-06 |
|                  |                                                      | PA(16:0/18:1(11Z))                                                                                   | 1.35756 | 16.44603 | 9.35E-06 |
|                  |                                                      | PI(18:4(6Z,9Z,12Z,15Z)/20:5(5Z,8Z,11Z,14Z,17Z))                                                      | 1.19926 | 2.47979  | 1.18E-05 |
|                  |                                                      | PE(16:1(9Z)/P-18:1(11Z))                                                                             | 2.85638 | 3.373724 | 1.68E-05 |
|                  |                                                      | PE(14:0/20:1(11Z))                                                                                   | 6.21779 | 2.562148 | 1.75E-05 |
|                  |                                                      | PE(14:0/20:3(5Z,8Z,11Z))                                                                             | 2.11651 | 4.412098 | 1.98E-05 |
|                  |                                                      | PC(15:0/20:1(11Z))                                                                                   | 1.22482 | 2.317441 | 2.32E-05 |
|                  |                                                      | PS(16:0/20:4(5Z,8Z,11Z,14Z))                                                                         | 1.2354  | 4.698771 | 2.93E-05 |
|                  |                                                      | PC(15:0/18:3(6Z,9Z,12Z))                                                                             | 2.01545 | 2.936664 | 0.000164 |
|                  |                                                      | PE(16:0/22:6(4Z,7Z,10Z,13Z,16Z,19Z))                                                                 | 1.15709 | 2.843547 | 0.0003   |

|                         |                            |                                                                                 |         |          |          |
|-------------------------|----------------------------|---------------------------------------------------------------------------------|---------|----------|----------|
|                         |                            | PE(18:2(9Z,12Z)/0:0)                                                            | 1.1296  | 0.410319 | 0.000306 |
|                         |                            | PA(P-16:0/15:1(9Z))                                                             | 1.63355 | 3.272371 | 0.000356 |
|                         |                            | PI(20:5(5Z,8Z,11Z,14Z,17Z)/0:0)                                                 | 1.06734 | 0.312122 | 0.001015 |
|                         |                            | PS(22:1(11Z)/0:0)                                                               | 1.77188 | 0.343688 | 0.001422 |
|                         |                            | PG(16:0/20:4(5Z,8Z,11Z,14Z))                                                    | 1.03493 | 2.040321 | 0.001545 |
|                         |                            | PG(O-16:0/20:2(11Z,14Z))                                                        | 1.43067 | 2.057013 | 0.001902 |
|                         |                            | PI(18:4(6Z,9Z,12Z,15Z)/0:0)                                                     | 7.07601 | 0.33405  | 0.007722 |
|                         |                            | PG(10:0/10:0)                                                                   | 2.43747 | 2.075134 | 0.029753 |
|                         |                            | PG(O-16:0/17:2(9Z,12Z))                                                         | 1.72249 | 0.29128  | 0.030238 |
|                         | Glycerolipids              | DG(17:2(9Z,12Z)/22:4(7Z,10Z,13Z,16Z)/0:0)[iso2]                                 | 5.6121  | 2.865126 | 2.27E-06 |
|                         |                            | DG(17:2(9Z,12Z)/22:5(7Z,10Z,13Z,16Z,19Z)/0:0)[iso2]                             | 1.83968 | 4.337038 | 3E-06    |
|                         |                            | DG(14:0/20:3(5Z,8Z,11Z)/0:0)                                                    | 1.11385 | 2.638215 | 0.000495 |
|                         |                            | DG(18:1(11Z)/22:6(4Z,7Z,10Z,13Z,16Z,19Z)/0:0)                                   | 1.51081 | 74.24566 | 0.000644 |
|                         |                            | DG(14:0/20:2(11Z,14Z)/0:0)                                                      | 1.08354 | 2.11338  | 0.008679 |
|                         |                            | DG(17:2(9Z,12Z)/22:6(4Z,7Z,10Z,13Z,16Z,19Z)/0:0)[iso2]                          | 1.34784 | 0.016105 | 0.008883 |
|                         |                            | MGDG(16:0/18:2(9Z,12Z))                                                         | 1.07381 | 2.018792 | 0.018195 |
|                         |                            | DG(12:0/12:0/0:0)[iso2]                                                         | 1.08678 | 153.9806 | 0.0223   |
|                         | Isoprenoids                | Loganin                                                                         | 2.65788 | 0.288176 | 0.000326 |
|                         |                            | Rhodoxanthin                                                                    | 1.62266 | 2.926133 | 0.000683 |
|                         |                            | (-)-Jolkinol B                                                                  | 1.32317 | 0.052775 | 0.007286 |
|                         |                            | (+)-Dysideapalaunic acid                                                        | 1.33455 | 3.639304 | 0.016737 |
|                         |                            | Chamazulene                                                                     | 2.63312 | 2.187569 | 0.04359  |
|                         |                            | Gibberellin A9                                                                  | 2.58016 | 0.010884 | 0.000161 |
|                         | Steroids/Sterols           | 6beta-hydroxytestosterone                                                       | 1.6196  | 0.02154  | 5.53E-07 |
|                         |                            | Xeniasterol-b                                                                   | 1.34143 | 2.245727 | 4.13E-06 |
|                         |                            | Estriol                                                                         | 1.41698 | 0.008738 | 0.000205 |
|                         |                            | 27-nor-campestan-3beta,4beta,5alpha,6alpha,7beta,8beta,14alpha,15alpha,24-nonol | 2.56422 | 4.118123 | 0.000394 |
|                         |                            | 1,3,5(10)-estratrien-17-one-3,7,8-triol                                         | 2.44022 | 0.020739 | 0.000414 |
|                         |                            | Hydrocortisone cypionate                                                        | 4.41987 | 0.354596 | 0.000816 |
|                         |                            | 16-a-Hydroxypregnenolone                                                        | 1.50838 | 2.559452 | 0.001003 |
|                         |                            | Tetrahydrodeoxycorticosterone                                                   | 3.49644 | 2.707549 | 0.001215 |
|                         |                            | 2-deoxyecdysone 22-phosphate                                                    | 1.34993 | 3.820382 | 0.00209  |
|                         |                            | 3-O-(Galb)-(25R)-12-oxo-5alpha-spirostan-3beta-ol                               | 1.65956 | 2.596219 | 0.008336 |
|                         |                            | Fludrocortisone                                                                 | 1.44792 | 0.001575 | 0.016053 |
|                         | Sphingolipids/ sphingosine | Prosafrinine                                                                    | 2.56955 | 2.036356 | 0.001061 |
| Nucleic acid metabolism | Pyrimidine metabolism      | Thymidine                                                                       | 1.02049 | 0.090325 | 1.74E-05 |
|                         | Purine metabolism          | Adenosine                                                                       | 2.7713  | 0.415298 | 4.16E-05 |
|                         |                            | Adenine                                                                         | 3.97607 | 0.360246 | 0.00407  |
| Incretions              |                            | L-Thyronine                                                                     | 1.05446 | 4.177319 | 2.26E-05 |
|                         |                            | Nandrolone                                                                      | 1.08422 | 2.48015  | 0.001398 |
|                         |                            | C22-PGF4alpha                                                                   | 2.07767 | 3.37504  | 0.002451 |

|                         |                       |                                                                     |         |          |          |
|-------------------------|-----------------------|---------------------------------------------------------------------|---------|----------|----------|
|                         |                       | 11-deoxy-16,16-dimethyl-PGE2                                        | 2.11617 | 2.137295 | 0.000311 |
|                         |                       | 1a,1b-dihomo-PGE2                                                   | 3.21462 | 2.893371 | 0.002157 |
| Ketones                 |                       | Denticulaflavonol                                                   | 15.3186 | 0.341953 | 2.98E-05 |
|                         |                       | Grandiflorone                                                       | 1.77779 | 0.019568 | 0.000137 |
|                         |                       | 3beta,4beta,5-Trimethoxy-4'-hydroxy- (6:7)-2,2-dimethylpyranoflavan | 4.49618 | 10.62155 | 0.002796 |
|                         |                       | Flemiphyllin                                                        | 1.4848  | 0.310648 | 0.002891 |
|                         |                       | 8,8-Dimethyl-2-phenyl-4H,8H-benzo[1,2-b:3,4-b']dipyrans-4-one       | 1.11657 | 0.163325 | 0.00602  |
|                         |                       | Repensol3,7,9-Trihydroxycoumestan                                   | 1.36235 | 0.43457  | 0.006667 |
|                         |                       | Epothilone B                                                        | 1.28482 | 3.747531 | 0.007136 |
| Carbohydrate metabolism |                       | L-Malic acid                                                        | 3.11298 | 0.345209 | 0.014738 |
|                         |                       | Collettiside I                                                      | 1.75132 | 2.727368 | 0.007184 |
| Antibiotics             | Antibiotics           | Azithromycin                                                        | 1.03926 | 0.103445 | 0.000165 |
| Others                  | Alkanes/ Hydrocarbons | 14S-Methyl-1-octadecene                                             | 1.52161 | 2.010568 | 0.014926 |
|                         |                       | all-trans-heptaprenyl diphosphate                                   | 4.37249 | 2.973273 | 0.000124 |
|                         |                       | Rolliniastatin-1                                                    | 1.72134 | 2.989453 | 0.041589 |
|                         |                       | Pyridinoline                                                        | 3.95487 | 0.286546 | 5.37E-08 |
|                         |                       | Ibuprofen                                                           | 1.33037 | 0.410886 | 0.000365 |
|                         |                       | Eugenol                                                             | 3.15307 | 2.09968  | 0.000954 |

<sup>a</sup>The difference in the abundance of each metabolite is expressed as the ratio of its average content in the 0.40-SeL group and in the 0.15-SeL group (0.40-SeL/0.15-SeL). A ratio of >1 indicates that the corresponding metabolite had higher abundance in the 0.40-SeL group, whereas a ratio of <1 indicates that the corresponding metabolite has lower abundance in the 0.40-SeL group. <sup>b</sup>Differences in metabolite abundances between the 0.40-SeL and 0.15-SeL groups were analyzed using one-way analysis of variance, followed by the Tukey's post hoc test.  $P < 0.05$  was considered as significant.

**Table S4 Significantly altered fecal metabolites in the Se-D/0.15-SeM comparison**

| Super-pathway        | Sub-pathway                   | Metabolites                                                                                                                                                                                | VIP value | FC <sup>a</sup> | P value <sup>b</sup> |
|----------------------|-------------------------------|--------------------------------------------------------------------------------------------------------------------------------------------------------------------------------------------|-----------|-----------------|----------------------|
| Bile acid metabolism |                               | Chenodeoxycholic acid glycine conjugate                                                                                                                                                    | 1.51285   | 0.476466        | 0.032429             |
|                      |                               | Sulfolithocholic acid                                                                                                                                                                      | 3.92342   | 26.63791        | 0.000842             |
|                      |                               | Tauroursodeoxycholic acid                                                                                                                                                                  | 1.26087   | 0.237499        | 2.53E-09             |
|                      |                               | Bilirubin                                                                                                                                                                                  | 1.01558   | 4.271931        | 0.042908             |
|                      |                               | L-Carnitine                                                                                                                                                                                | 1.48519   | 2.441368        | 1.51E-05             |
|                      |                               | Glycocholic acid 3-glucuronide                                                                                                                                                             | 3.41026   | 0.011692        | 9.39E-15             |
| Neurosubstances      |                               | 4-Acetamidobutanoic acid                                                                                                                                                                   | 1.40817   | 2.95161         | 0.04105              |
|                      |                               | Escitalopram                                                                                                                                                                               | 1.56893   | 0.08739         | 8.5E-06              |
|                      |                               | Melatonin                                                                                                                                                                                  | 1.36749   | 0.43562         | 5.6E-06              |
|                      |                               | Ecgonine methyl ester                                                                                                                                                                      | 4.20657   | 0.32494         | 2.7E-08              |
|                      |                               | Nervonic acid                                                                                                                                                                              | 7.30779   | 223.1153        | 1.16E-05             |
|                      |                               | N-stearoyl GABA                                                                                                                                                                            | 1.51419   | 0.282118        | 1.12E-07             |
|                      |                               | Arachidonoyl Serotonin                                                                                                                                                                     | 1.55344   | 2.176414        | 5.22E-08             |
| Vitamins             | Vitamin D and its derivatives | (17E)-1alpha,25-dihydroxy-26,27-dimethyl-17,20,22,22,23,23-hexadehydro-24a-homovitamin D3 / (17E)-1alpha,25-dihydroxy-26,27-dimethyl-17,20,22,22,23,23-hexadehydro-24a-homocholecalciferol | 1.24422   | 0.391733        | 0.00393              |
|                      |                               | 1alpha-hydroxy-24-methylsulfonyl-25,26,27-trinorvitamin D3 / 1alpha-hydroxy-24-methylsulfonyl-                                                                                             | 1.61722   | 2.008662        | 8.67E-08             |

|                         |                                                        |                                                                                                                                |                     |          |          |
|-------------------------|--------------------------------------------------------|--------------------------------------------------------------------------------------------------------------------------------|---------------------|----------|----------|
|                         |                                                        | 25,26,27-trinorcholecalciferol                                                                                                 |                     |          |          |
|                         |                                                        | 24,24-difluoro-1alpha,25-dihydroxy-26,27-dimethylvitamin D3 / 24,24-difluoro-1alpha,25-dihydroxy-26,27-dimethylcholecalciferol | 2.42068             | 223.2241 | 3.81E-06 |
|                         |                                                        | 24,25-Dihydroxyvitamin D                                                                                                       | 1.67867             | 2.245452 | 0.002819 |
|                         |                                                        | 26,26,26,27,27,27-hexafluoro-1alpha-hydroxyvitamin D3 / 26,26,26,27,27,27-hexafluoro-1alpha-hydroxycholecalciferol             | 2.10718             | 0.486232 | 0.008562 |
|                         |                                                        | 26,26,26-trifluoro-25-hydroxy-27-norvitamin D3 / 26,26,26-trifluoro-25-hydroxy-27-norcholecalciferol                           | 1.28119             | 0.363562 | 0.001774 |
|                         |                                                        | 4,4-difluorovitamin D3 / 4,4-difluorocholecalciferol                                                                           | 2.80543             | 38.91997 | 5.73E-06 |
| Amino acids             | Homoserine                                             | N-(3S-hydroxy-butanoyl)-homoserine lactone                                                                                     | 1.58598             | 0.378397 | 0.000823 |
|                         |                                                        | N-butanoyl-lhomoserine lactone                                                                                                 | 4.11693             | 0.476125 | 8.43E-06 |
|                         |                                                        | N-heptanoyl-homoserine lactone                                                                                                 | 3.57278             | 0.45242  | 1.39E-06 |
|                         | Sulfur-containing amino acids                          | 5-Methyltetrahydrofolic acid                                                                                                   | 3.28058             | 0.12541  | 0.00282  |
|                         | Lysine                                                 | Epsilon-(gamma-Glutamyl)-lysine                                                                                                | 1.39232             | 0.459528 | 0.000539 |
|                         | Tryptophan metabolism                                  | Indolelactic acid                                                                                                              | 2.42811             | 0.464381 | 0.000119 |
|                         | Aspartic acid                                          | L-Aspartic acid                                                                                                                | 2.10404             | 0.372443 | 6.59E-07 |
|                         | Histidine                                              | L-Histidine                                                                                                                    | 1.94249             | 0.190876 | 3.76E-08 |
|                         | Arginine                                               | N-a-Acetyl-L-arginine                                                                                                          | 2.35978             | 0.429777 | 0.005641 |
|                         | Arginine biosynthesis                                  | N-Acetylmethionine                                                                                                             | 1.52921             | 0.32129  | 2.97E-06 |
|                         | Glycine                                                | N-stearoyl glycine                                                                                                             | 1.26753             | 0.303104 | 0.005873 |
|                         |                                                        | Isoleucine                                                                                                                     | N-oleoyl isoleucine | 1.79024  | 0.203193 |
| Carbohydrate metabolism |                                                        | D-Xylose                                                                                                                       | 1.29348             | 3.757102 | 8.23E-07 |
|                         |                                                        | Tuberonic acid glucoside                                                                                                       | 1.04322             | 0.286434 | 1.03E-08 |
|                         |                                                        | Fumaric acid                                                                                                                   | 1.8847              | 0.373672 | 1.4E-05  |
|                         |                                                        | 24Z-ethylidene-cholest-5-en-3beta-ol 3-O-beta-D-glucopyranoside                                                                | 2.56334             | 0.300462 | 0.001362 |
|                         |                                                        | stigmast-5-en-3beta-ol 3-O-beta-D-glucopyranoside                                                                              | 4.3085              | 0.19313  | 0.019449 |
|                         |                                                        | Collettiside I                                                                                                                 | 1.07039             | 0.409336 | 0.013867 |
|                         |                                                        | convallatoxin                                                                                                                  | 1.30237             | 7.713719 | 4.61E-08 |
| Nucleic acid metabolism | Pyrimidine metabolism                                  | Thymine                                                                                                                        | 2.43521             | 2.044122 | 0.000472 |
|                         | Purine metabolism                                      | Adenine                                                                                                                        | 2.03822             | 2.032476 | 0.043829 |
|                         |                                                        | Adenosine                                                                                                                      | 1.22361             | 2.373011 | 0.007951 |
|                         |                                                        | Xanthine                                                                                                                       | 2.65497             | 3.030454 | 1.45E-05 |
| Fatty acids             | Medium chain fatty acids and their derivates           | N-(6-aminohexanoyl)-6-aminohexanoic acid                                                                                       | 3.43884             | 0.321762 | 1.07E-07 |
|                         |                                                        | 2-amino-8-oxo-9,10-epoxy-decanoic acid                                                                                         | 6.15581             | 0.238345 | 8.08E-10 |
|                         | Long chain unsaturated fatty acids and their derivates | 2-propyl-9Z-octadecenoic Acid                                                                                                  | 3.28469             | 264.6699 | 8.04E-06 |
|                         |                                                        | 7,9,13,17-tetramethyl-7S,14S-dihydroxy-2E,4E,8E,10E,12E,16-octadecaheptaenoic acid                                             | 1.03026             | 3.810446 | 0.003208 |
|                         |                                                        | 16-bromo-9E-hexadecenoic acid                                                                                                  | 1.19216             | 27.03482 | 0.000373 |
|                         |                                                        | 22-tricosenoic acid                                                                                                            | 8.25461             | 133.6564 | 1.43E-06 |
|                         |                                                        | 24-hydroxy-10Z-tetracosenoic acid                                                                                              | 8.01133             | 3.182757 | 0.000567 |
|                         |                                                        | 25:2(5Z,9Z)(23Me)                                                                                                              | 3.16577             | 231.5704 | 3.83E-05 |

|                  |                                                      |                                                                                       |         |          |          |
|------------------|------------------------------------------------------|---------------------------------------------------------------------------------------|---------|----------|----------|
|                  |                                                      | 3E,5E-tridecadienoic acid                                                             | 3.86685 | 2.181473 | 1.14E-07 |
|                  |                                                      | 6-bromo-docosa-5E,9Z-dienoic acid                                                     | 1.48979 | 0.274924 | 6.51E-06 |
|                  |                                                      | 9,13-dihydroxy-10-ethoxy-11-octadecenoic acid                                         | 1.19264 | 2.80324  | 0.000108 |
|                  |                                                      | 9-hexacosenoic acid                                                                   | 3.88443 | 41.51341 | 0.009512 |
|                  |                                                      | Lesquerolic acid                                                                      | 12.744  | 0.279808 | 1.07E-05 |
|                  |                                                      | Mycolipenic acid (C25)                                                                | 10.6047 | 81.79125 | 5.27E-06 |
|                  | Long chain saturated fatty acids and their derivates | 9R,10S-dihydroxy-stearic acid                                                         | 3.91542 | 2.039498 | 0.000208 |
|                  |                                                      | 12-bromo-octadecanoic acid                                                            | 1.29127 | 0.367813 | 2.1E-07  |
|                  |                                                      | 15-hydroxy-pentadecanoic acid                                                         | 1.89218 | 2.610553 | 2.62E-06 |
|                  |                                                      | 20-oxo-heneicosanoic acid                                                             | 3.05452 | 2.134339 | 0.00799  |
|                  |                                                      | 24-hydroxy-tetracosanoic acid                                                         | 4.42964 | 4.783347 | 0.000187 |
|                  |                                                      | 2-hydroxy-tricosanoic acid                                                            | 3.36299 | 8.204516 | 1.1E-05  |
|                  |                                                      | 3-bromohexadecanoic acid                                                              | 1.99935 | 3.394409 | 4.89E-06 |
|                  |                                                      | 3-hydroxy-eicosanoic acid                                                             | 1.04145 | 0.434255 | 0.003332 |
|                  |                                                      | Heptadecanoic acid                                                                    | 4.29624 | 2.094429 | 0.003457 |
|                  |                                                      | Pentadecanoic acid                                                                    | 1.73755 | 2.840238 | 0.001728 |
|                  | Diprotic acid and their derivatives                  | 2-hydroxy-decanedioic acid                                                            | 1.01118 | 3.800817 | 0.023452 |
|                  |                                                      | Eicosanedioic acid                                                                    | 1.26437 | 37.22752 | 1.65E-05 |
|                  |                                                      | Heneicosanedioic acid                                                                 | 1.65907 | 2.193262 | 0.010956 |
|                  |                                                      | Hexacosanedioic acid                                                                  | 1.03894 | 2.534165 | 0.012001 |
|                  | Short chain fatty acid and their derivatives         | Hydroxypropionic acid                                                                 | 1.58132 | 2.600682 | 0.003772 |
|                  |                                                      | 4-Guanidinobutanoic acid                                                              | 1.1526  | 2.921946 | 0.001674 |
|                  |                                                      | 3-O-(alpha-L-arabinopyranosyl-(1->6)-beta-D-glucopyranosyl) butyl 3S-hydroxybutanoate | 1.4572  | 0.113013 | 3.86E-06 |
| Lipid metabolism | Cholesterol and derivatives                          | Cholesterol glucuronide                                                               | 1.50907 | 0.303193 | 0.000402 |
|                  |                                                      | 24-norcholesterol                                                                     | 1.62072 | 3.154935 | 2.84E-06 |
|                  |                                                      | 7-Dehydrocholesterol                                                                  | 4.16527 | 2.014309 | 2.03E-06 |
|                  |                                                      | Cholest-5-ene                                                                         | 3.40571 | 151.1536 | 6.3E-09  |
|                  |                                                      | cholesteryl beta-D-glucoside                                                          | 3.13711 | 0.220244 | 7.12E-06 |
|                  |                                                      | ecdysone 25-O-D-glucopyranoside                                                       | 1.56044 | 0.026715 | 0.030173 |
|                  | Lysophospholipid                                     | LysoPC(20:0)                                                                          | 1.22355 | 0.464634 | 0.001324 |
|                  |                                                      | LysoPC(22:0)                                                                          | 1.07541 | 0.235347 | 9.97E-08 |
|                  |                                                      | LysoPC(P-18:0)                                                                        | 1.97157 | 0.340696 | 0.00332  |
|                  |                                                      | LysoPC(P-18:1(9Z))                                                                    | 1.90433 | 0.45288  | 0.022305 |
|                  | Glycerophosphates                                    | PA(12:0/12:0)                                                                         | 1.38459 | 0.34183  | 0.001193 |
|                  |                                                      | PA(13:0/18:4(6Z,9Z,12Z,15Z))                                                          | 1.09736 | 2.374589 | 8.31E-08 |
|                  |                                                      | PA(13:0/20:3(8Z,11Z,14Z))                                                             | 1.66837 | 105.1573 | 2.15E-10 |
|                  |                                                      | PA(O-16:0/12:0)                                                                       | 1.31156 | 2.825885 | 0.020691 |
|                  |                                                      | PA(P-16:0/14:1(9Z))                                                                   | 2.25008 | 2.218962 | 0.031652 |
|                  | Glycerophosphocholines                               | PC(10:0/10:0)                                                                         | 2.78479 | 0.307512 | 0.008677 |
|                  |                                                      | PC(15:0/18:3(6Z,9Z,12Z))                                                              | 1.05435 | 2.687711 | 0.003103 |
|                  |                                                      | PC(16:0/2:0)                                                                          | 1.12363 | 0.38546  | 0.008072 |

|                             |                                                             |         |          |          |
|-----------------------------|-------------------------------------------------------------|---------|----------|----------|
|                             | PC(4:0/4:0)                                                 | 1.48298 | 2.023942 | 1.67E-09 |
|                             | PC(6:0/0:0)                                                 | 1.04525 | 0.291782 | 5.11E-06 |
|                             | PC(8:0/0:0)                                                 | 1.28244 | 4.507191 | 8.67E-05 |
|                             | PC(9:0/0:0)                                                 | 1.84122 | 5.285621 | 6.42E-05 |
|                             | PC(O-14:0/15:0)                                             | 13.4395 | 0.185339 | 5.42E-07 |
|                             | PC(O-14:0/16:0)                                             | 5.97736 | 0.160269 | 2.32E-05 |
|                             | PC(O-16:0/0:0)                                              | 4.92324 | 0.327681 | 0.01017  |
|                             | PC(P-17:0/0:0)                                              | 3.27697 | 0.270812 | 3.21E-09 |
|                             | PC(P-19:1(12Z)/0:0)                                         | 1.40214 | 0.40143  | 7.9E-07  |
|                             | PC(O-16:0/O-1:0)                                            | 3.27968 | 0.18922  | 2.65E-08 |
|                             | PC(O-18:0/O-2:0)                                            | 1.99337 | 0.293378 | 1.23E-06 |
|                             | PC(O-18:1(9Z)/O-1:0)                                        | 1.01305 | 0.119464 | 2.44E-16 |
|                             | PC(O-8:0/O-8:0)                                             | 1.68984 | 0.347959 | 0.013595 |
| Glycerophosphoethanolamines | PE(14:0/20:1(11Z))                                          | 3.28265 | 2.067292 | 0.002507 |
|                             | PE(18:4(6Z,9Z,12Z,15Z)/18:4(6Z,9Z,12Z,15Z))                 | 1.19765 | 2.343079 | 0.031017 |
|                             | PE(O-16:0/14:0)                                             | 1.02774 | 0.260694 | 4.91E-05 |
|                             | PE(O-16:0/15:0)                                             | 5.78097 | 0.140236 | 6.6E-06  |
| Glycerophosphoglycerols     | PG(10:0/10:0)                                               | 2.24491 | 0.212055 | 7.75E-06 |
|                             | PG(16:1(9Z)/22:2(13Z,16Z))                                  | 1.12813 | 0.346039 | 0.000397 |
|                             | PG(20:2(11Z,14Z)/0:0)                                       | 1.15136 | 0.143676 | 7.09E-05 |
|                             | PG(22:6(4Z,7Z,10Z,13Z,16Z,19Z)/0:0)                         | 1.657   | 0.416546 | 2.35E-10 |
|                             | PG(22:6(4Z,7Z,10Z,13Z,16Z,19Z)/22:6(4Z,7Z,10Z,13Z,16Z,19Z)) | 2.75306 | 0.26133  | 0.00202  |
|                             | PG(O-16:0/17:2(9Z,12Z))                                     | 1.26308 | 0.200057 | 0.000141 |
|                             | PG(O-16:0/20:1(11Z))                                        | 1.44994 | 0.364076 | 4.78E-06 |
|                             | PG(O-16:0/20:2(11Z,14Z))                                    | 1.18306 | 0.281006 | 6.29E-07 |
|                             | PG(O-18:0/20:3(8Z,11Z,14Z))                                 | 2.14475 | 0.289553 | 1.51E-06 |
|                             | PG(O-20:0/0:0)                                              | 1.1837  | 0.427089 | 0.00033  |
|                             | PG(P-20:0/0:0)                                              | 3.52799 | 0.240855 | 2.9E-07  |
| Glycerophosphoinositols     | PI(16:0/0:0)                                                | 1.06745 | 0.169251 | 1.24E-06 |
|                             | PI(18:4(6Z,9Z,12Z,15Z)/0:0)                                 | 2.79354 | 2.138101 | 0.03241  |
|                             | PI(22:2(13Z,16Z)/0:0)                                       | 1.85259 | 3.0903   | 0.000282 |
|                             | PI(O-16:0/0:0)                                              | 8.07426 | 0.225936 | 2.04E-07 |
|                             | PI(O-16:0/16:1(9Z))                                         | 1.52967 | 0.178632 | 3.68E-05 |
| Glycerophosphoserines       | PS(14:1(9Z)/22:6(4Z,7Z,10Z,13Z,16Z,19Z))                    | 1.11057 | 2.475111 | 0.045703 |
|                             | PS(15:0/0:0)                                                | 1.02726 | 0.417823 | 0.00223  |
|                             | PS(15:0/22:2(13Z,16Z))                                      | 2.04239 | 0.481339 | 0.008709 |
|                             | PS(O-16:0/18:2(9Z,12Z))                                     | 3.93155 | 0.242425 | 7.25E-08 |
|                             | PS(P-20:0/17:2(9Z,12Z))                                     | 1.4295  | 0.301035 | 1.41E-05 |
|                             | CPA(18:0)                                                   | 1.30219 | 0.423639 | 0.000526 |
| Diacylglycerols             | DG(15:0/18:3(6Z,9Z,12Z)/0:0)                                | 1.7421  | 2.230961 | 0.003317 |
|                             | DG(17:2(9Z,12Z)/22:4(7Z,10Z,13Z,16Z)/0:0)[iso2]             | 2.75846 | 2.271019 | 8.54E-05 |

|                                   |                            |                                                                            |                                        |          |          |          |
|-----------------------------------|----------------------------|----------------------------------------------------------------------------|----------------------------------------|----------|----------|----------|
|                                   |                            | DG(17:2(9Z,12Z)/22:5(7Z,10Z,13Z,16Z,19Z)/0:0)[iso2]                        | 1.05893                                | 3.999539 | 0.000178 |          |
| Isoprenoids                       |                            | 20:2(5Z,9Z)(11Me,15Me,19Me)                                                | 1.36032                                | 117.1252 | 5.95E-05 |          |
|                                   |                            | 4-oxo-Retinoic acid                                                        | 1.28998                                | 2.312699 | 0.000284 |          |
|                                   |                            | C25:4 Highly branched isoprenoid A                                         | 1.16329                                | 0.398792 | 1.64E-05 |          |
|                                   |                            | Gibberellin A9                                                             | 1.66937                                | 0.022096 | 0.000163 |          |
|                                   |                            | Moronic acid                                                               | 1.46605                                | 2.789352 | 0.00223  |          |
|                                   |                            | Rhodoxanthin                                                               | 1.05423                                | 7.60183  | 0.00016  |          |
| Steroids/ Sterols                 |                            | 29-demethylgeodisterol-O-sulfite                                           | 2.6649                                 | 11.83113 | 0.024001 |          |
|                                   |                            | 3-O-(Galb)-(25R)-12-oxo-5alpha-spirostan-3beta-ol                          | 1.41856                                | 0.272145 | 0.00081  |          |
|                                   |                            | 3-O-(Rhaa 1-4(Rhaa 1-2)Glc)-26-O-(Glc)-(25R)-furost-5-en-3beta,22,26-triol | 2.32149                                | 0.098371 | 6.84E-06 |          |
|                                   |                            | Campestanol                                                                | 2.41991                                | 9.722291 | 0.000762 |          |
|                                   |                            | cyasterone                                                                 | 1.23612                                | 0.495401 | 0.003568 |          |
|                                   |                            | Theonellasterol D                                                          | 2.28727                                | 2.743582 | 0.008416 |          |
|                                   |                            | 19-Hydroxyandrost-4-ene-3,17-dione                                         | 1.39549                                | 2.149774 | 0.003882 |          |
|                                   |                            | 6beta-hydroxytestosterone                                                  | 1.0598                                 | 0.012658 | 2.21E-05 |          |
|                                   |                            | Fludrocortisone                                                            | 1.47565                                | 55.85572 | 0.001407 |          |
|                                   |                            | 1,3,5(10)-estratrien-17-one-3,7,8-triol                                    | 1.50954                                | 0.021883 | 5.52E-05 |          |
|                                   |                            | Ximaosteroid C                                                             | 1.61306                                | 0.494979 | 0.005481 |          |
|                                   | Sphingolipids/ sphingosine |                                                                            | (3'-sulfo)Galbeta-Cer(d18:1/16:0(2OH)) | 1.0114   | 0.363995 | 1.05E-05 |
|                                   |                            | (4E,6E,d14:2) sphingosine                                                  | 1.11479                                | 0.083007 | 0.000181 |          |
|                                   |                            | C16 Sphinganine-1-phosphate                                                | 4.8912                                 | 0.195409 | 2.89E-12 |          |
|                                   |                            | Obscuraminol A                                                             | 1.09294                                | 2.745768 | 5.13E-07 |          |
|                                   |                            | Phytosphingosine                                                           | 1.37166                                | 0.39726  | 0.00104  |          |
|                                   |                            | Prosafrinine                                                               | 1.6407                                 | 2.146507 | 0.000603 |          |
|                                   |                            | Cer(d16:1/17:0)                                                            | 2.49776                                | 2.122916 | 0.014313 |          |
|                                   |                            | Cer(d18:0/13:0)                                                            | 1.18199                                | 0.318654 | 5.2E-08  |          |
|                                   |                            | Cer(d18:0/14:0)                                                            | 1.50966                                | 0.099343 | 3.18E-07 |          |
|                                   |                            | Cer(d18:0/15:0)                                                            | 2.10072                                | 5.637528 | 5.05E-05 |          |
|                                   |                            | Cer(d18:0/h17:0)                                                           | 6.06897                                | 2.587865 | 2.93E-06 |          |
|                                   |                            | Cer(d18:1/14:0)                                                            | 1.24812                                | 2.916059 | 0.001756 |          |
|                                   |                            | Cer(d18:2/14:0)                                                            | 1.59714                                | 0.289542 | 2.06E-06 |          |
|                                   |                            | Cer(d18:2/16:0)                                                            | 1.3032                                 | 0.304232 | 1.48E-05 |          |
|                                   |                            | Cer(t18:0/16:0)                                                            | 4.5425                                 | 3.296807 | 1.2E-05  |          |
| Acyl carnitine/lipid biosynthesis |                            |                                                                            | Dodecanoylcarnitine                    | 3.80777  | 2.142821 | 4.12E-05 |
|                                   |                            |                                                                            | Isobutyryl-L-carnitine                 | 1.0355   | 2.388871 | 0.015755 |
|                                   |                            | L-Palmitoylcarnitine                                                       | 3.17695                                | 0.446867 | 0.017235 |          |
| Incretions                        |                            | Nandrolone                                                                 | 1.10202                                | 4.074855 | 0.003431 |          |
|                                   |                            | Tetranor-PGEM-d6                                                           | 3.61457                                | 2.056475 | 2.21E-05 |          |
|                                   |                            | Androsterone sulfate                                                       | 1.21593                                | 2.14206  | 1.68E-05 |          |
| Antibiotics                       |                            | Glycyrrhetic acid                                                          | 1.14791                                | 2.66517  | 0.00779  |          |
|                                   |                            | 10-Deoxymethymycin                                                         | 2.89236                                | 89.63038 | 2.41E-05 |          |

|                          |        |                                                           |         |          |          |
|--------------------------|--------|-----------------------------------------------------------|---------|----------|----------|
| Amines                   |        | N,N-(2,2-dihydroxy-ethyl) arachidonoyl amine              | 1.07743 | 25.37584 | 0.040999 |
|                          |        | N-Oleylethanolamine                                       | 2.45581 | 0.412021 | 0.015505 |
| Ketones                  |        | 3-Geranyl-4,2',4',6'-tetrahydroxy-5-prenyldihydrochalcone | 1.50858 | 2687.155 | 3.75E-06 |
|                          |        | Desmosdumotin C                                           | 1.07441 | 0.000672 | 0.021118 |
|                          |        | Grandiflorone                                             | 1.31381 | 0.021586 | 3.7E-05  |
|                          |        | Isocordoin                                                | 1.43148 | 0.1224   | 3.38E-08 |
|                          |        | Lophirone E                                               | 1.08086 | 581.3657 | 0.042539 |
| Aldehydes                |        | 2-decene-4,6,8-triyn-1-al                                 | 1.03212 | 0.338198 | 0.005342 |
|                          |        | 2-dodecenal                                               | 2.70565 | 349.2531 | 7.02E-06 |
| Alcohols                 |        | 3,7,11-Trimethyl-6E,10-dodecadien-1-ol                    | 3.2097  | 3.926297 | 0.002934 |
|                          |        | 6Z-Heneicosen-11-ol                                       | 4.89917 | 5.955072 | 8.72E-06 |
|                          |        | 9-pentadecen-1-ol                                         | 8.65895 | 2.343414 | 9.5E-05  |
|                          |        | Gummiferol                                                | 1.09118 | 6.924574 | 0.002354 |
|                          |        | Panaxydol chlorohydrine                                   | 1.02533 | 3.086127 | 0.003992 |
|                          |        | Nitenin                                                   | 1.05613 | 59.42946 | 4.12E-08 |
|                          |        | 6-Ketoestriol                                             | 1.61583 | 0.007046 | 2.99E-08 |
| Esters                   |        | Epothilone A                                              | 4.36586 | 0.346651 | 3.07E-09 |
|                          |        | (E,E)-3,7,11-Trimethyl-2,6,10-dodecatrienyl decanoate     | 2.4257  | 96.07922 | 2.01E-05 |
|                          |        | (Z)-5-Dodecenyl (Z)-5-dodecenoate                         | 1.94152 | 739.5735 | 9.88E-06 |
| Alkanes/<br>Hydrocarbons |        | 9,10-Epoxy-3Z,6Z-tricosadiene                             | 2.53064 | 4.18538  | 0.001043 |
|                          |        | 14S-Methyl-1-octadecene                                   | 1.16088 | 2.612936 | 0.000367 |
|                          |        | 6Z,9Z-Docosadiene                                         | 1.92092 | 602.6862 | 3.75E-06 |
| Others                   | Ethers | 3'-O-methylbatatasin III                                  | 1.95069 | 2.270517 | 0.010383 |
|                          |        | Pyridinoline                                              | 2.25639 | 2.035763 | 3.37E-06 |
|                          |        | Pandaroside B                                             | 1.74333 | 2.749691 | 0.000284 |
|                          |        | Atenolol                                                  | 1.73398 | 0.11659  | 2.7E-06  |
|                          |        | Scilliroside                                              | 2.05118 | 2.719489 | 0.006231 |
|                          |        | punaglandin 6                                             | 1.05865 | 0.01531  | 0.00138  |

<sup>a</sup>The difference in the abundance of each metabolite is expressed as the ratio of its average content in the Se-D group and in the 0.15-SeM group (Se-D/0.15-SeM). A ratio of >1 indicates that the corresponding metabolite had higher abundance in the Se-D group, whereas a ratio of <1 indicates that the corresponding metabolite has lower abundance in the Se-D group. <sup>b</sup>Differences in metabolite abundances between the Se-D and 0.15-SeM groups were analyzed using one-way analysis of variance, followed by the Tukey's post hoc test.  $P < 0.05$  was considered as significant.

**Table S5 Significantly altered fecal metabolites in the 0.40-SeM/0.15-SeM comparison**

| Super-pathway        | Sub-pathway          | Metabolites                          | VIP value | FC <sup>a</sup> | P value <sup>b</sup> |
|----------------------|----------------------|--------------------------------------|-----------|-----------------|----------------------|
| Bile acid metabolism | Bile acid metabolism | glycochenodeoxycholic acid 7-sulfate | 1.39184   | 0.274189        | 0.00032              |
|                      |                      | ponasterone A                        | 1.76251   | 2.22668         | 0.000214             |
|                      |                      | Glycocholic acid 3-glucuronide       | 2.95388   | 0.43708         | 5.22E-07             |
| Neurosubstances      |                      | 5-Hydroxy-L-tryptophan               | 3.1321    | 2.674812        | 1.31E-06             |
|                      |                      | Escitalopram                         | 1.40917   | 0.417351        | 0.002265             |



|             |                                                                                                                                                  |                                      |                                                                                                                                                        |          |          |          |
|-------------|--------------------------------------------------------------------------------------------------------------------------------------------------|--------------------------------------|--------------------------------------------------------------------------------------------------------------------------------------------------------|----------|----------|----------|
|             |                                                                                                                                                  | Pregnenolone sulfate                 | 1.19279                                                                                                                                                | 2.048167 | 0.000161 |          |
|             |                                                                                                                                                  | Ecgonine methyl ester                | 2.23635                                                                                                                                                | 0.351039 | 0.023194 |          |
| Vitamins    | Vitamin B6 and its derivatives                                                                                                                   | 4-Pyridoxic acid                     | 3.04365                                                                                                                                                | 0.486049 | 0.000939 |          |
|             | Vitamin H and its derivatives                                                                                                                    | Biotin                               | 1.22612                                                                                                                                                | 0.265059 | 0.037365 |          |
|             | Vitamin D2 and its derivatives                                                                                                                   | 7-Dehydrocholesterol-3-sulfate ester | 5.06783                                                                                                                                                | 2.635881 | 7.88E-05 |          |
|             | Vitamin D3 and its derivatives                                                                                                                   |                                      | (22E)-26,26,26,27,27,27-hexafluoro-25-hydroxy-22,23-didehydrovitamin D3 / (22E)-26,26,26,27,27,27-hexafluoro-25-hydroxy-22,23-didehydrocholecalciferol | 5.37945  | 0.361466 | 0.00243  |
|             |                                                                                                                                                  |                                      | (23R,25R)-25-hydroxyvitamin D3 26,23-lactone / (23R,25R)-25-hydroxycholecalciferol 26,23-lactone                                                       | 2.63078  | 3.776422 | 0.00048  |
|             |                                                                                                                                                  |                                      | (23S)-1alpha-hydroxy-25,27-didehydrovitamin D3 26,23-lactone                                                                                           | 2.73971  | 0.471401 | 0.008969 |
|             |                                                                                                                                                  |                                      | (6RS)-6,19-epidioxy-24,24-difluoro-25-hydroxy-6,19-dihydrovitamin D3 / (6RS)-6,19-epidioxy-24,24-difluoro-25-hydroxy-6,19-dihydrocholecalciferol       | 1.20118  | 14.65293 | 9.15E-05 |
|             |                                                                                                                                                  |                                      | 1,25-dihydroxy-2,4-dinor-1,3-secovitamin D3 / 1,25-dihydroxy-2,4-dinor-1,3-secocholecalciferol                                                         | 2.04387  | 2.231559 | 0.000664 |
|             |                                                                                                                                                  |                                      | 1alpha,25-dihydroxy-21-nor-20-oxavitamin D3 / 1alpha,25-dihydroxy-21-nor-20-oxacholecalciferol                                                         | 1.88511  | 2.35564  | 0.005949 |
|             |                                                                                                                                                  |                                      | 1alpha,25-dihydroxy-25,25-diphenyl-26,27-dinorvitamin D3 / 1alpha,25-dihydroxy-25,25-diphenyl-26,27-dinorcholecalciferol                               | 1.80107  | 2.588921 | 7.32E-06 |
|             |                                                                                                                                                  |                                      | 1alpha,25-dihydroxy-2beta-(6-hydroxyhexyl)vitamin D3 / 1alpha,25-dihydroxy-2beta-(6-hydroxyhexyl)cholecalciferol                                       | 1.16158  | 23.10517 | 0.00038  |
|             |                                                                                                                                                  |                                      | 1alpha-hydroxy-2beta-(4-hydroxybutoxy)vitamin D3 / 1alpha-hydroxy-2beta-(4-hydroxybutoxy)cholecalciferol                                               | 1.74648  | 22.58923 | 6.25E-05 |
|             |                                                                                                                                                  |                                      | 24,24-Difluoro-1,25,26-trihydroxyvitamin D3                                                                                                            | 1.19319  | 2.626957 | 0.000151 |
|             | 24,24-difluoro-1alpha,25-dihydroxy-26,27-dimethyl-24a-homovitamin D3 / 24,24-difluoro-1alpha,25-dihydroxy-26,27-dimethyl-24a-homocholecalciferol | 1.33195                              | 0.384979                                                                                                                                               | 6.33E-06 |          |          |
|             | 26,27-diethyl-1alpha,25-dihydroxy-20,21-methano-23-oxavitamin D3 / 26,27-diethyl-1alpha,25-dihydroxy-20,21-methano-23-oxacholecalciferol         | 1.12078                              | 5.267158                                                                                                                                               | 0.000826 |          |          |
| Fatty acids | Medium chain fatty acids and their derivatives                                                                                                   | 10-undecynoic acid                   | 1.87866                                                                                                                                                | 5.036351 | 3.19E-05 |          |
|             |                                                                                                                                                  | 2,6-nonadienoic acid                 | 3.16804                                                                                                                                                | 2.548586 | 1.3E-07  |          |
|             |                                                                                                                                                  | 2E,4E,8Z,10E-dodecatetraenoic acid   | 2.69952                                                                                                                                                | 4.683978 | 1.26E-06 |          |
|             |                                                                                                                                                  | 2-hydroxy-10-undecenoic acid         | 5.93091                                                                                                                                                | 5.792366 | 1.23E-06 |          |
|             |                                                                                                                                                  | 5-oxo-7-octenoic acid                | 2.83596                                                                                                                                                | 0.281451 | 0.014799 |          |
|             |                                                                                                                                                  | 9-hydroxy-5Z-nonenoic acid           | 1.44308                                                                                                                                                | 5.195959 | 4.06E-06 |          |
|             |                                                                                                                                                  | 9-oxo-2E-decenoic acid               | 1.68978                                                                                                                                                | 5.468252 | 0.010675 |          |

|  |                                                          |                                                                           |         |          |          |
|--|----------------------------------------------------------|---------------------------------------------------------------------------|---------|----------|----------|
|  |                                                          | formyl 2E,4E,6Z-decatrienoate                                             | 1.34307 | 3.839562 | 3.13E-06 |
|  |                                                          | 5-hydroperoxy-7-[3,5-epidioxy-2-(2-octenyl)-cyclopentyl]-6-heptenoic acid | 1.26263 | 4364.57  | 0.004231 |
|  |                                                          | 9,12-dioxo-dodecanoic acid                                                | 5.76685 | 5.885062 | 9.45E-07 |
|  |                                                          | methyl 8-[2-(2-formyl-vinyl)-3-hydroxy-5-oxo-cyclopentyl]-octanoate       | 1.42795 | 2.347081 | 8.5E-05  |
|  |                                                          | 2-hydroxy pelargonic acid                                                 | 3.60671 | 10.21506 | 1.27E-07 |
|  |                                                          | 3-O-(2-O-(2E-decenoyl)-alpha-L-rhamnopyranosyl)-3-hydroxydecanoic acid    | 2.03902 | 14.74886 | 2.72E-06 |
|  |                                                          | 3-O-alpha-L-rhamnopyranosyl-3-hydroxydecanoic acid                        | 2.25881 | 2.640501 | 2.35E-07 |
|  |                                                          | 3,6-dioxo-decanoic acid                                                   | 2.19732 | 6.094899 | 3.9E-06  |
|  |                                                          | Pelargonic acid                                                           | 1.49568 | 2.641251 | 7.24E-07 |
|  |                                                          | Sebacic acid                                                              | 1.03068 | 3.508608 | 1.53E-06 |
|  |                                                          | N-(6-aminohexanoyl)-6-aminohexanoic acid                                  | 6.0325  | 5.131858 | 0.001035 |
|  | Long chain unsaturated fatty acids and their derivatives | methyl 9,10-epoxy-12,15-octadecadienoate                                  | 1.97342 | 2.583436 | 0.033802 |
|  |                                                          | methyl 9,12-dihydroxy-13-oxo-10-octadecenoate                             | 4.39168 | 17.11936 | 0.000717 |
|  |                                                          | 12S-hydroxy-16-heptadecynoic acid                                         | 1.99028 | 2.808387 | 2.29E-05 |
|  |                                                          | 10-hydroxy-2E-decenoic acid                                               | 1.70331 | 3.221949 | 0.000118 |
|  |                                                          | 10-nitro-9E-octadecenoic acid                                             | 1.30045 | 13.79857 | 3.96E-05 |
|  |                                                          | 11-hydroperoxy-12,13-epoxy-9-octadecenoic acid                            | 13.9255 | 7.466856 | 5.59E-07 |
|  |                                                          | 12,13-dihydroxy-11-methoxy-9-octadecenoic acid                            | 1.32385 | 4.574064 | 4.78E-05 |
|  |                                                          | 12-oxo-14,18-dihydroxy-9Z,13E,15Z-octadecatrienoic acid                   | 6.06167 | 3.535304 | 4.77E-07 |
|  |                                                          | 13-keto-9Z,11E,15Z-octadecatrienoic acid                                  | 14.1017 | 3.264298 | 1.12E-06 |
|  |                                                          | 24:3(15Z,18Z,21Z)                                                         | 2.26397 | 0.315339 | 3.58E-05 |
|  |                                                          | 7-oxo-11E,13-Tetradecadienoic acid                                        | 2.20703 | 2.379941 | 4.83E-06 |
|  |                                                          | 8,12-dihydroxy-9-chloro-5Z,10Z,14Z,17Z-eicosatetraenoic acid              | 1.12989 | 0.223427 | 1.34E-05 |
|  |                                                          | 8-hydroxy-13Z-octadecene-9,11-diynoic acid                                | 3.79683 | 2.337949 | 2.91E-07 |
|  |                                                          | 9,10,13-TriHOME                                                           | 4.72744 | 4.391364 | 0.001232 |
|  |                                                          | 9,10-DHOME                                                                | 4.74896 | 2.364995 | 0.000421 |
|  |                                                          | 9,12,13-TriHOME                                                           | 2.41816 | 28.41526 | 4.32E-07 |
|  |                                                          | 9S-HpOTrE                                                                 | 8.29206 | 3.708413 | 4.45E-07 |
|  | Long chain saturated fatty acids and their derivatives   | 10-oxo-nonadecanoic acid                                                  | 6.9923  | 2.411156 | 0.005163 |
|  |                                                          | Pristanic acid                                                            | 3.09847 | 2.063572 | 0.016631 |
|  |                                                          | 13-hydroxy-tridecanoic acid                                               | 2.30041 | 11.99126 | 3.82E-09 |
|  |                                                          | 14-hydroxy-heneicosanoic acid                                             | 1.46201 | 0.396476 | 0.000377 |
|  |                                                          | 17-hydroxy-heptadecanoic acid                                             | 6.46418 | 6.666473 | 0.002548 |
|  |                                                          | 18-hydroxy-9S,10R-dihydroxy-stearic acid                                  | 6.07809 | 5.579911 | 0.001818 |
|  |                                                          | 20-oxo-heneicosanoic acid                                                 | 3.2229  | 0.351562 | 0.000603 |
|  |                                                          | 9R,10S-dihydroxy-stearic acid                                             | 1.40147 | 3.316757 | 3.77E-05 |

|                         |                                               |                                                                                       |         |          |          |
|-------------------------|-----------------------------------------------|---------------------------------------------------------------------------------------|---------|----------|----------|
|                         |                                               | Heptadecanoic acid                                                                    | 2.45507 | 2.845595 | 2.58E-06 |
|                         |                                               | Pentadecanoic acid                                                                    | 1.61025 | 2.339282 | 0.005221 |
|                         |                                               | Sativic acid                                                                          | 3.26826 | 12.5606  | 7.13E-07 |
|                         | Diprotic acid and their derivatives           | Undecanedioic acid                                                                    | 1.45439 | 2.694848 | 0.001575 |
|                         |                                               | 2-methyl-tridecanedioic acid                                                          | 1.4195  | 20.19946 | 2E-08    |
|                         |                                               | 3-hydroxy-tetradecanedioic acid                                                       | 3.0375  | 2.998576 | 5.47E-06 |
|                         |                                               | 2-methyl-hexadecanedioic acid                                                         | 5.10095 | 3.617884 | 5.54E-05 |
|                         |                                               | 3-hydroxy-dodecanedioic acid                                                          | 4.22283 | 4.711392 | 5.96E-07 |
|                         |                                               | 9,10-dihydroxy-Octadecanedioic acid                                                   | 3.28376 | 7.145032 | 4.53E-10 |
|                         |                                               | Azelaic acid                                                                          | 2.98324 | 4.259401 | 8.12E-05 |
|                         |                                               | Dodecanedioic acid                                                                    | 1.48551 | 2.661637 | 0.005538 |
|                         |                                               | Eicosanedioic acid                                                                    | 1.04058 | 22.42105 | 0.045419 |
|                         |                                               | Heneicosanedioic acid                                                                 | 1.77873 | 0.337802 | 0.000341 |
|                         |                                               | Hexacosanedioic acid                                                                  | 1.15313 | 0.194729 | 0.000106 |
|                         | Short chain fatty acids and their derivatives | Propionylcarnitine                                                                    | 2.80363 | 5.156399 | 7.61E-06 |
|                         |                                               | 3-O-(alpha-L-arabinopyranosyl-(1->6)-beta-D-glucopyranosyl) butyl 3S-hydroxybutanoate | 1.30971 | 0.46107  | 0.001597 |
|                         |                                               | 4-Guanidinobutanoic acid                                                              | 1.35904 | 3.614156 | 3.82E-08 |
|                         |                                               | N-arachidonoyl GABA                                                                   | 1.31617 | 0.459002 | 0.009853 |
|                         |                                               | Butyric acid                                                                          | 1.227   | 10.57198 | 3.16E-05 |
|                         |                                               | Hydroxypropionic acid                                                                 | 1.56172 | 2.508874 | 0.019257 |
| Aldehydes               | Aldehydes                                     | 2-decene-4,6,8-triyn-1-al                                                             | 1.44699 | 0.276092 | 0.001695 |
|                         |                                               | 3,7-Dimethyl-8,11-dioxo-2E,6E,9E-dodecatrienal                                        | 3.01251 | 7.584885 | 0.002221 |
|                         |                                               | 10Z-Nonadecenal                                                                       | 1.23773 | 2.123758 | 0.018867 |
|                         |                                               | Sorbaldehyde                                                                          | 1.11236 | 5.347953 | 0.000159 |
| Nucleic acid metabolism |                                               | Adenine                                                                               | 2.29564 | 0.302591 | 0.004776 |
|                         |                                               | Uric acid                                                                             | 1.03177 | 0.213765 | 2.89E-05 |
|                         |                                               | Inosine                                                                               | 1.52592 | 2.312746 | 0.004559 |
|                         |                                               | Thymidine                                                                             | 3.27502 | 2.273618 | 0.001763 |
|                         |                                               | Adenosine                                                                             | 1.67522 | 2.393845 | 0.001912 |
| Ketones                 |                                               | Isocordoin                                                                            | 1.35401 | 0.402362 | 6.89E-05 |
|                         |                                               | Piperaduncin A                                                                        | 2.23194 | 0.274542 | 9.57E-07 |
|                         |                                               | Piperaduncin B                                                                        | 1.48247 | 0.340539 | 8.67E-08 |
|                         |                                               | 2-Geranyl-3,4,2',4'-tetrahydroxydihydrochalcone                                       | 1.0598  | 0.301054 | 0.009292 |
|                         |                                               | alpha,4,2'-Trihydroxy-4-O-geranyldihydrochalcone                                      | 1.11874 | 2.127727 | 0.01915  |
|                         |                                               | Denticulaflavonol                                                                     | 3.29932 | 0.402993 | 0.00137  |
|                         |                                               | Ulexone B                                                                             | 1.42724 | 0.415636 | 0.046744 |
|                         |                                               | Lespedeol A                                                                           | 1.02031 | 2.85974  | 0.000197 |
|                         |                                               | cis-Jasmone                                                                           | 2.04388 | 5.583376 | 1.15E-06 |
| Alcohols                |                                               | 3,5-Di-O-methyl-8-prenylafzelechin-4beta-ol                                           | 4.36129 | 0.47497  | 0.045876 |
|                         |                                               | Dryopterin                                                                            | 1.63308 | 0.258039 | 0.001722 |

|                                             |                       |                                                    |          |          |          |
|---------------------------------------------|-----------------------|----------------------------------------------------|----------|----------|----------|
|                                             |                       | 3,4,7-Trihydroxy-5,4'-dimethoxy-6,8-dimethylflavan | 1.18992  | 3.031596 | 2.41E-07 |
| Amides                                      |                       | Capsaicin                                          | 2.12392  | 22.59326 | 0.000462 |
|                                             |                       | N-Oleoylethanolamine                               | 2.537    | 0.491345 | 0.025048 |
| Esters                                      |                       | 2,6Z-Nonadien-4-olide                              | 1.53381  | 5.104719 | 2.58E-05 |
|                                             |                       | phorbol 13-acetate 12-myristate                    | 4.49669  | 131.4075 | 9.55E-07 |
| Incretions                                  |                       | Zearalenone                                        | 1.03545  | 0.361257 | 0.025758 |
|                                             |                       | 3b,17b-Dihydroxyetiocholane                        | 5.32934  | 3.404629 | 0.003914 |
|                                             |                       | 15R-PGE2 methyl ester, 15-acetate                  | 1.66788  | 4.663334 | 8.95E-07 |
|                                             |                       | 1a,1b-dihomo-PGE2                                  | 1.80148  | 0.48111  | 0.001435 |
|                                             |                       | 2,3-Dinor-6-keto-prostaglandin F1 a                | 1.15125  | 2.075251 | 5.72E-06 |
|                                             |                       | Norepinephrine sulfate                             | 1.02463  | 8.103244 | 0.02678  |
|                                             |                       | Prostaglandin F1a                                  | 3.02952  | 3.465786 | 1.57E-07 |
|                                             |                       | 11-dehydro-2,3-dinor-TXB2                          | 1.75557  | 5.236511 | 9.48E-07 |
|                                             |                       | Jasmonic acid                                      | 4.09825  | 5.289132 | 7.91E-07 |
|                                             |                       | Prostaglandin D3                                   | 1.08306  | 2.867618 | 5.72E-07 |
|                                             |                       | Tetranor-PGF1alpha                                 | 1.01318  | 2.6909   | 6.29E-06 |
|                                             |                       | 9-deoxy-9-methylene-PGE2                           | 1.05845  | 5.772397 | 0.000122 |
|                                             |                       | 18-Oxocortisol                                     | 2.21108  | 5.144901 | 3.33E-08 |
|                                             |                       | Nandrolone                                         | 1.50247  | 3.678347 | 3.61E-05 |
|                                             |                       | Androsterone                                       | 1.79868  | 2.541592 | 0.003409 |
| Carbohydrate metabolism                     |                       | L-Malic acid                                       | 3.46073  | 3.562484 | 0.007878 |
|                                             |                       | (-)-menthyl beta-D-glucoside                       | 2.75843  | 2.688984 | 2.37E-07 |
| Lipid metabolism                            | Lipid biosynthesis    | Stearoylcarnitine                                  | 1.02253  | 14.00904 | 0.001189 |
|                                             | Diacylglycerols       | DG(14:1(9Z)/18:3(6Z,9Z,12Z)/0:0)                   | 1.30819  | 7.660168 | 0.002433 |
|                                             |                       | DG(15:0/18:3(6Z,9Z,12Z)/0:0)                       | 1.08585  | 66.4905  | 0.000139 |
|                                             |                       | DG(15:0/20:3(5Z,8Z,11Z)/0:0)                       | 1.3073   | 2.351588 | 0.008105 |
|                                             |                       | DG(15:0/20:4(5Z,8Z,11Z,14Z)/0:0)                   | 1.79862  | 4.072392 | 0.018504 |
|                                             |                       | DG(15:0/20:5(5Z,8Z,11Z,14Z,17Z)/0:0)               | 3.02358  | 3.17541  | 0.021071 |
|                                             | Glycerophosphocholine | LysoPC(P-18:0)                                     | 1.04603  | 0.24615  | 0.000956 |
|                                             | Glycerophospholipids  | PA(13:0/18:4(6Z,9Z,12Z,15Z))                       | 1.47294  | 2.461601 | 1.18E-10 |
|                                             |                       | PA(16:0/0:0)                                       | 3.27287  | 0.447462 | 1.38E-06 |
|                                             |                       | PA(17:0/0:0)                                       | 1.71381  | 5.564419 | 8.26E-06 |
|                                             |                       | PA(20:0/0:0)                                       | 6.65211  | 0.453672 | 0.001773 |
|                                             |                       | PA(O-16:0/12:0)                                    | 1.35878  | 0.157242 | 0.00023  |
|                                             |                       | PA(P-16:0/14:1(9Z))                                | 2.43238  | 0.372049 | 0.000399 |
|                                             |                       | PC(O-16:0/0:0)                                     | 7.37947  | 0.19687  | 0.00193  |
|                                             |                       | PE(14:0/20:3(5Z,8Z,11Z))                           | 1.09718  | 2.351224 | 0.027181 |
| PE(15:0/18:3(6Z,9Z,12Z))                    |                       | 1.51421                                            | 0.275268 | 1E-05    |          |
| PE(18:4(6Z,9Z,12Z,15Z)/18:4(6Z,9Z,12Z,15Z)) |                       | 1.31934                                            | 0.323243 | 0.000189 |          |
|                                             | PG(14:0/14:0)         | 3.10654                                            | 36.5033  | 9.44E-05 |          |

|  |                   |                                                                          |         |          |          |
|--|-------------------|--------------------------------------------------------------------------|---------|----------|----------|
|  |                   | PG(16:1(9Z)/22:2(13Z,16Z))                                               | 1.12345 | 0.498495 | 0.003071 |
|  |                   | PG(20:1(11Z)/0:0)                                                        | 2.38064 | 2.0496   | 0.001477 |
|  |                   | PG(22:6(4Z,7Z,10Z,13Z,16Z,19Z)/0:0)                                      | 1.18361 | 0.323964 | 0.026082 |
|  |                   | PG(O-20:0/14:1(9Z))                                                      | 2.17245 | 0.405598 | 1.08E-05 |
|  |                   | PI(O-20:0/0:0)                                                           | 1.59036 | 63.13903 | 0.001094 |
|  |                   | PS(14:1(9Z)/20:5(5Z,8Z,11Z,14Z,17Z))                                     | 1.05458 | 0.298195 | 7.9E-06  |
|  |                   | PS(14:1(9Z)/22:6(4Z,7Z,10Z,13Z,16Z,19Z))                                 | 1.28976 | 0.237165 | 0.00015  |
|  |                   | 2-(8-[3]-ladderane-octanyl)-sn-glycero-3-phosphocholine                  | 1.83634 | 3.819344 | 0.000106 |
|  | Cholesterol       | (25S)-5alpha-cholestan-3beta,6alpha,7beta,8beta,15alpha,16beta,26-heptol | 5.40233 | 7.880885 | 1.48E-06 |
|  |                   | 15,20-dihydroxycholest-4,14-dien-3,16-dione                              | 3.75972 | 3.833045 | 0.000455 |
|  |                   | 5alpha-cholestan-3beta,6alpha,8beta,15alpha,24S-triol                    | 3.61778 | 0.334533 | 6.75E-05 |
|  |                   | 5alpha,9alpha-epidioxy-cholest-7-en-3beta,6alpha-diol                    | 1.10061 | 0.321722 | 0.002184 |
|  |                   | 5alpha,6beta-dihydroxycholestanol                                        | 1.30117 | 0.437402 | 0.000102 |
|  |                   | Cholest-5-ene                                                            | 1.56938 | 31.07336 | 0.018112 |
|  | Phosphocholine    | PC(O-16:0/O-1:0)                                                         | 3.04969 | 0.468931 | 7.08E-05 |
|  |                   | PC(O-16:0/O-2:0)                                                         | 1.79686 | 0.407786 | 9.01E-05 |
|  |                   | PC(O-18:0/O-2:0)                                                         | 2.02848 | 0.47774  | 8.04E-05 |
|  |                   | PC(O-8:0/O-8:0)                                                          | 2.65647 | 0.181121 | 0.001716 |
|  |                   | PC(P-15:0/0:0)                                                           | 1.94635 | 2.503571 | 3.14E-06 |
|  | Isoprenoids       | (-)-Fusidic acid                                                         | 1.02097 | 0.155374 | 0.000953 |
|  |                   | (-)-Jolkinol A                                                           | 1.55147 | 2.495695 | 0.001935 |
|  |                   | C25:2 6,7-Epoxy highly branched isoprenoid                               | 1.26594 | 0.337396 | 9.95E-05 |
|  |                   | C25:4 Highly branched isoprenoid A                                       | 1.04556 | 0.457068 | 2.69E-05 |
|  |                   | Chamazulene                                                              | 2.98647 | 2.737421 | 0.007051 |
|  |                   | forskolin                                                                | 3.38114 | 4.85845  | 1.4E-07  |
|  |                   | gibberellin A17                                                          | 1.87795 | 3.919063 | 0.001076 |
|  |                   | Hemigossypol                                                             | 1.03289 | 0.459242 | 0.000464 |
|  |                   | Japonicumins A                                                           | 2.87958 | 16.12562 | 0.000146 |
|  |                   | Ketospirilloxanthin                                                      | 1.72151 | 7.489274 | 0.000939 |
|  |                   | Moronic acid                                                             | 1.24728 | 0.335918 | 0.000568 |
|  | Terpenoids        | Onocerin                                                                 | 1.06739 | 0.464906 | 0.00033  |
|  | Steroids/ Sterols | (20S,24S)-24-ethylthornasterol                                           | 1.46585 | 0.492038 | 0.000763 |
|  |                   | 1,3,5(10)-estratrien-17-one-3,7,8-triol                                  | 1.05074 | 0.423778 | 0.039574 |
|  |                   | 20,26-dihydroxyecdysone                                                  | 4.05479 | 7.308466 | 1.14E-05 |
|  |                   | 22-deoxy-20,21-dihydroxyecdysone                                         | 8.36008 | 12.85633 | 3.08E-06 |
|  |                   | 3-O-(Rhaa1-4(Rhaa1-2)Glc)-26-O-(Glc)-25R-furost-5-en-3beta,22,26-triol   | 2.38434 | 0.312513 | 0.000233 |
|  |                   | 6alpha-Hydroxycasterone                                                  | 2.57382 | 0.451054 | 4.59E-06 |
|  |                   | 6beta-hydroxytestosterone                                                | 2.51439 | 9.829817 | 0.000226 |
|  |                   | cimicifoetiside B                                                        | 1.63258 | 2.654956 | 0.002079 |

|                       |                                 |                                                      |          |          |          |
|-----------------------|---------------------------------|------------------------------------------------------|----------|----------|----------|
|                       |                                 | Cucurbitacin C                                       | 1.17527  | 3.233139 | 6.53E-06 |
|                       |                                 | Cucurbitacin D                                       | 3.77724  | 5.136351 | 1.53E-06 |
|                       |                                 | Cucurbitacin F                                       | 1.0605   | 0.379701 | 0.000444 |
|                       |                                 | Episceptrungenin                                     | 1.32346  | 2.316955 | 0.000187 |
|                       |                                 | Kammogenin                                           | 5.29412  | 5.039512 | 6.08E-08 |
|                       |                                 | Minabeolide-4                                        | 1.49096  | 4.611352 | 0.000471 |
|                       |                                 | Stoloniferone F                                      | 1.03069  | 0.465241 | 0.002139 |
|                       |                                 | Tetrahydrodeoxycorticosterone                        | 1.87284  | 0.496163 | 0.002383 |
|                       |                                 | Theonellasterol D                                    | 2.22177  | 2.039856 | 0.003984 |
| Amino acid metabolism | Glycine derivatives             | Isovalerylglycine                                    | 2.09032  | 0.330386 | 0.016698 |
|                       |                                 | Nicotinuric acid                                     | 1.22354  | 0.267572 | 0.028315 |
|                       |                                 | Hippuric acid                                        | 1.26224  | 0.275227 | 0.031193 |
|                       | Arginine and proline metabolism | Creatinine                                           | 3.45053  | 0.32937  | 0.020922 |
|                       |                                 | N-palmitoyl proline                                  | 1.12871  | 4.405075 | 0.027671 |
|                       | Serine                          | N-(3-oxododecanoyl) homoserine lactone               | 1.73031  | 24.85566 | 0.00024  |
|                       |                                 | Serratamic acid                                      | 1.44743  | 3.024756 | 5.95E-07 |
|                       | Sulfur amino acid metabolism    | 5-Methyltetrahydrofolic acid                         | 3.83094  | 0.280994 | 0.013244 |
|                       | Lysine derivative               | Homocitrulline                                       | 2.6318   | 5.531063 | 1.83E-09 |
| pentapeptide          | APGPR Enterostatin              | 1.00427                                              | 0.402019 | 0.008248 |          |
| Others                | Phenols                         | p-Cresol sulfate                                     | 3.98782  | 0.39179  | 0.009265 |
|                       |                                 | Epigallocatechin 5,3',5'-trimethyl ether 3-O-gallate | 1.10019  | 0.056623 | 0.000471 |
|                       |                                 | Coproporphyrin III                                   | 4.49746  | 0.306939 | 0.000353 |
|                       |                                 | 2R-HpOTrE                                            | 2.34593  | 5.965969 | 5.24E-05 |
|                       |                                 | Rolliniastatin-1                                     | 2.72984  | 6.33468  | 0.000384 |
|                       |                                 | Berberine                                            | 1.01593  | 5.435721 | 1.31E-06 |
|                       |                                 | 30,32-dihydroxy-2b-methyl-bishomohopane              | 1.51266  | 0.366162 | 0.000421 |
|                       |                                 | Kynurenic acid                                       | 1.5162   | 0.354634 | 0.017425 |
|                       |                                 | all-trans-heptaprenyl diphosphate                    | 1.76779  | 0.360671 | 0.01502  |
|                       |                                 | Atenolol                                             | 1.61144  | 0.398444 | 0.002468 |

<sup>a</sup>The difference in the abundance of each metabolite is expressed as the ratio of its average content in the 0.40-SeM group and in the 0.15-SeM group (0.40-SeM/0.15-SeM). A ratio of >1 indicates that the corresponding metabolite had higher abundance in the 0.40-SeM group, whereas a ratio of <1 indicates that the corresponding metabolite has lower abundance in the 0.40-SeM group. <sup>b</sup>Differences in metabolite abundances between the 0.40-SeM and 0.15-SeM groups were analyzed using one-way analysis of variance, followed by the Tukey's post hoc test.  $P < 0.05$  was considered as significant.

**Table S6 Significantly altered fecal metabolites in the 0.15-SeM and 0.15-SeL comparison**

| Super-pathway        | Sub-pathway          | Metabolites                                                  | VIP value | FC <sup>a</sup> | P value <sup>b</sup> |
|----------------------|----------------------|--------------------------------------------------------------|-----------|-----------------|----------------------|
| Bile acid metabolism | Bile acid metabolism | (20S,22E)-3beta-Hydroxychole-5,16,22-trien-24-oic Acid       | 20.3042   | 0.499669        | 0.007718             |
|                      |                      | 3alpha,7alpha,12alpha-trihydroxy-5alpha-cholan-24-yl sulfate | 1.004     | 0.079772        | 0.012698             |
|                      |                      | Sulfolithocholic acid                                        | 3.4565    | 0.075366        | 0.014594             |
| Neurosubstances      | GABA derivative      | 12-HETE-GABA                                                 | 7.59703   | 0.487429        | 0.004939             |

|                         |                                                          |                                                                                                                                |         |          |          |
|-------------------------|----------------------------------------------------------|--------------------------------------------------------------------------------------------------------------------------------|---------|----------|----------|
|                         |                                                          | Escitalopram                                                                                                                   | 1.39545 | 2.044428 | 0.022871 |
|                         |                                                          | Nervonic acid                                                                                                                  | 4.51618 | 0.018342 | 0.009229 |
| Vitamins                | Vitamin D                                                | 24,24-difluoro-1alpha,25-dihydroxy-26,27-dimethylvitamin D3 / 24,24-difluoro-1alpha,25-dihydroxy-26,27-dimethylcholecalciferol | 1.56192 | 0.016346 | 0.009599 |
|                         |                                                          | 24,25-Dihydroxyvitamin D                                                                                                       | 2.36412 | 0.464389 | 0.006392 |
|                         |                                                          | 4,4-difluorovitamin D3 / 4,4-difluorocholecalciferol                                                                           | 1.48771 | 0.124126 | 0.012718 |
|                         | Vitamin B6                                               | Pyridoxamine                                                                                                                   | 1.43986 | 0.47474  | 0.007479 |
| Amino acids             | Tryptophan metabolism                                    | Indoleacetic acid                                                                                                              | 1.70765 | 0.490105 | 0.019732 |
|                         | Homoserine                                               | N-heptanoyl-homoserine lactone                                                                                                 | 8.04266 | 0.356614 | 0.013146 |
|                         | isoleucine                                               | N-oleoyl isoleucine                                                                                                            | 1.93878 | 2.0159   | 0.00223  |
| Carbohydrate metabolism |                                                          | 24Z-ethylidene-cholest-5-en-3beta-ol 3-O-beta-D-glucopyranoside                                                                | 3.45892 | 2.155823 | 0.001448 |
|                         |                                                          | 2-O-(beta-D-galactopyranosyl-(1->6)-beta-D-galactopyranosyl) 2S,3R-dihydroxyundecanoic acid                                    | 1.02843 | 2.989993 | 5.56E-05 |
|                         |                                                          | Collettiside I                                                                                                                 | 1.95715 | 3.134898 | 0.004241 |
|                         |                                                          | convallatoxin                                                                                                                  | 1.3721  | 0.200266 | 0.000169 |
|                         |                                                          | D-Xylose                                                                                                                       | 1.021   | 0.436381 | 0.025178 |
|                         |                                                          | Iokundjoside                                                                                                                   | 1.19018 | 4.547486 | 0.000174 |
| Nucleic acid metabolism |                                                          | Adenosine                                                                                                                      | 2.9959  | 0.32556  | 1.51E-06 |
|                         |                                                          | Uric acid                                                                                                                      | 1.35464 | 0.454336 | 0.011001 |
| Fatty acids             | Long chain saturated fatty acids and their derivatives   | 15-hydroxy-pentadecanoic acid                                                                                                  | 1.7828  | 0.478506 | 0.037777 |
|                         |                                                          | 3-bromohexadecanoic acid                                                                                                       | 1.81252 | 0.401048 | 0.021109 |
|                         |                                                          | 2-hydroxy-tricosanoic acid                                                                                                     | 1.47773 | 0.491143 | 0.037373 |
|                         | Long chain unsaturated fatty acids and their derivatives | 16-bromo-9E-hexadecenoic acid                                                                                                  | 1.06182 | 0.072904 | 0.015058 |
|                         |                                                          | 18-fluoro-9Z-octadecenoic acid                                                                                                 | 1.41743 | 0.342272 | 0.014041 |
|                         |                                                          | 22-tricosenoic acid                                                                                                            | 4.73134 | 0.033699 | 0.009918 |
|                         |                                                          | 25:2(5Z,9Z)(23Me)                                                                                                              | 2.26632 | 0.013704 | 0.009466 |
|                         |                                                          | 28:2(5Z,9Z)(6Br)                                                                                                               | 1.11437 | 2.905645 | 0.004954 |
|                         |                                                          | 2-propyl-9Z-octadecenoic Acid                                                                                                  | 1.5337  | 0.025622 | 0.011241 |
|                         |                                                          | 8,12-dihydroxy-9-chloro-5Z,10Z,14Z,17Z-eicosatetraenoic acid                                                                   | 1.00786 | 2.218218 | 0.010311 |
|                         |                                                          | 9,13-dihydroxy-10-ethoxy-11-octadecenoic acid                                                                                  | 1.24003 | 0.416479 | 0.032661 |
|                         |                                                          | 9-hexacosenoic acid                                                                                                            | 4.31862 | 0.04399  | 0.008244 |
|                         |                                                          | Hydroxyeicosatetraenoic acid                                                                                                   | 3.12705 | 2.159697 | 0.010994 |
|                         | Mycolipenic acid (C25)                                   | 6.86281                                                                                                                        | 0.04467 | 0.009242 |          |
|                         | Medium chain fatty acids and their derivatives           | 3-O-(2-O-(2E-decenoyl)-alpha-L-rhamnopyranosyl)-3-hydroxydecanoic acid                                                         | 1.18888 | 3.069376 | 0.001826 |
|                         |                                                          | N-(6-aminohexanoyl)-6-aminohexanoic acid                                                                                       | 6.05797 | 0.419839 | 0.011457 |
|                         | Short chain fatty acid derivatives                       | 11,11-Difluoro-9Z-dodecenyl acetate                                                                                            | 1.12914 | 2.045574 | 0.000562 |
|                         | Diprotic acid                                            | 2-hydroxy-decanedioic acid                                                                                                     | 4.24002 | 0.045162 | 0.041341 |
|                         |                                                          | Pimelic acid                                                                                                                   | 1.36116 | 0.060191 | 0.011235 |
| Lipid metabolism        | Cholesterol and derivatives                              | Cholest-5-ene                                                                                                                  | 2.42976 | 0.018354 | 0.00993  |
|                         |                                                          | Cholesterol glucuronide                                                                                                        | 2.169   | 2.89347  | 0.001736 |
|                         | Lysophospholipid                                         | LysoPC(22:0)                                                                                                                   | 1.27504 | 2.053082 | 3.15E-05 |

|            |                             |                                                                                 |         |          |          |
|------------|-----------------------------|---------------------------------------------------------------------------------|---------|----------|----------|
|            |                             | LysoPC(24:0)                                                                    | 1.19473 | 2.261584 | 2.46E-06 |
|            | Glycerophosphates           | PA(18:0/18:1(9Z))                                                               | 1.11835 | 0.431081 | 0.023524 |
|            |                             | PA(22:1(11Z)/0:0)                                                               | 1.99219 | 0.416601 | 0.011821 |
|            | Glycerophosphocholines      | PC(11:0/0:0)                                                                    | 2.16009 | 0.46492  | 0.048111 |
|            |                             | PC(12:0/0:0)                                                                    | 7.11034 | 0.465356 | 0.049884 |
|            |                             | PC(8:0/0:0)                                                                     | 1.57615 | 0.244548 | 0.004823 |
|            |                             | PC(9:0/0:0)                                                                     | 1.80698 | 0.330435 | 0.003907 |
|            |                             | PC(O-14:0/15:0)                                                                 | 15.1294 | 2.059543 | 0.000102 |
|            |                             | PC(O-14:0/16:0)                                                                 | 6.22912 | 2.029295 | 0.003134 |
|            |                             | PC(O-16:0/O-1:0)                                                                | 3.63589 | 2.075869 | 0.000154 |
|            |                             | PC(O-18:1(9Z)/O-1:0)                                                            | 1.15015 | 2.172964 | 1.53E-06 |
|            | Glycerophosphoethanolamines | PE(O-16:0/14:0)                                                                 | 1.40193 | 2.656529 | 0.0002   |
|            |                             | PE(O-16:0/15:0)                                                                 | 7.33687 | 2.906254 | 0.000171 |
|            | Glycerophosphoglycerols     | PG(16:1(9Z)/22:2(13Z,16Z))                                                      | 1.73221 | 2.775226 | 0.000237 |
|            |                             | PG(18:0/18:1(11Z))                                                              | 5.56416 | 2.243027 | 0.000307 |
|            |                             | PG(20:2(11Z,14Z)/0:0)                                                           | 1.59875 | 3.884499 | 0.000259 |
|            |                             | PG(21:0/0:0)                                                                    | 1.32784 | 3.215985 | 0.000983 |
|            |                             | PG(22:1(11Z)/0:0)                                                               | 2.78892 | 0.307749 | 0.002256 |
|            |                             | PG(O-20:0/0:0)                                                                  | 1.69215 | 2.074906 | 0.000449 |
|            |                             | PG(P-20:0/0:0)                                                                  | 4.68311 | 2.530474 | 6.18E-06 |
|            | Glycerophosphoinositols     | PI(18:4(6Z,9Z,12Z,15Z)/0:0)                                                     | 7.23333 | 0.276719 | 0.003496 |
|            | Isoprenoids                 | (-)-Jolkinol B                                                                  | 1.16872 | 0.148852 | 0.015719 |
|            |                             | (11Z)-8,18-propano-retinal                                                      | 8.38407 | 0.458676 | 0.008611 |
|            |                             | Caesalpinin N                                                                   | 1.34069 | 3.084153 | 0.001289 |
|            | Steroids/ Sterols           | 27-nor-campestan-3beta,4beta,5alpha,6alpha,7beta,8beta,14alpha,15alpha,24-nonol | 1.62497 | 2.553424 | 0.006492 |
|            |                             | 29-demethylgeodisterol-O-sulfite                                                | 2.67913 | 0.198664 | 0.008267 |
|            |                             | 3-O-(Galb)-(25R)-12-oxo-5alpha-spirostan-3beta-ol                               | 2.09667 | 3.308359 | 0.001803 |
|            |                             | Cucurbitacin D                                                                  | 2.40508 | 0.399089 | 0.002388 |
|            |                             | Fludrocortisone                                                                 | 1.45689 | 0.03075  | 0.01909  |
|            | Sphingolipids/ sphingosine  | (3'-sulfo)Galbeta-Cer(d18:1/16:0(2OH))                                          | 1.55514 | 2.526705 | 4.37E-06 |
|            |                             | C16 Sulfatide                                                                   | 1.68028 | 2.298188 | 0.00011  |
|            |                             | Cer(d18:0/14:0)                                                                 | 1.75815 | 2.591061 | 0.000283 |
|            |                             | Obscuraminol A                                                                  | 1.32961 | 0.48544  | 7.12E-08 |
|            |                             | Sphinganine-1-phosphocholine                                                    | 1.09193 | 2.988506 | 2.14E-06 |
|            | Glycosyldiradylglycerols    | MGDG(16:0/18:2(9Z,12Z))                                                         | 1.70905 | 2.441004 | 7.63E-07 |
|            | Glycerophosphoserines       | CPA(18:0)                                                                       | 1.20174 | 0.309212 | 0.024583 |
|            | Diacylglycerols             | DG(17:2(9Z,12Z)/22:6(4Z,7Z,10Z,13Z,16Z,19Z)/0:0)[iso2]                          | 1.42504 | 0.015226 | 0.008811 |
|            | Other                       | PT(18:0/18:1(9Z))                                                               | 1.13333 | 2.496505 | 0.000464 |
| Incretions |                             | 1(3)-glyceryl-PGF2alpha                                                         | 1.05499 | 0.28607  | 0.024052 |
|            |                             | 18-Oxocortisol                                                                  | 1.09924 | 0.448452 | 0.022182 |
|            |                             | Estrone                                                                         | 1.34977 | 0.208686 | 0.023191 |



|          |             |                                                              |         |          |          |
|----------|-------------|--------------------------------------------------------------|---------|----------|----------|
| Alcohols |             | 11Z-eicosen-1-ol                                             | 2.52714 | 4.218534 | 0.010267 |
|          |             | 3,7,11-Trimethyl-6E,10-dodecadien-1-ol                       | 3.1878  | 0.432384 | 0.007761 |
|          |             | 6-Ketoestriol                                                | 1.45009 | 2.136686 | 0.007277 |
| Ketones  |             | 8,8-Dimethyl-2-phenyl-4H,8H-benzo[1,2-b:3,4-b']dipyran-4-one | 1.01912 | 0.248429 | 0.012364 |
|          |             | Euchrenone b2                                                | 1.10955 | 0.004907 | 0.018047 |
|          |             | Isocordoin                                                   | 1.38433 | 2.00039  | 0.00326  |
|          |             | Lophirone E                                                  | 1.12243 | 0.004801 | 0.012627 |
| Amines   |             | N-Oleoylethanolamine                                         | 1.19278 | 2.14711  | 0.01479  |
| Others   | Antibiotics | 10-Deoxymethymycin                                           | 1.93079 | 0.040474 | 0.009069 |
|          | Aldehydes   | 2-dodecenal                                                  | 1.067   | 0.027766 | 0.011862 |
|          | Ester       | phorbol 13-acetate 12-myristate                              | 1.85483 | 0.033284 | 0.044236 |
|          | Antioxidant | Gambiriin C                                                  | 1.76759 | 2.14935  | 2.36E-05 |
|          |             | Eugenol                                                      | 3.23192 | 2.19116  | 0.001    |
|          |             | Atenolol                                                     | 2.66546 | 7.930791 | 4.19E-06 |

<sup>a</sup>The difference in the abundance of each metabolite is expressed as the ratio of its average content in the 0.15-SeM group and in the 0.15-SeL group (0.15-SeM/0.15-SeL). A ratio of >1 indicates that the corresponding metabolite had higher abundance in the 0.15-SeM group, whereas a ratio of <1 indicates that the corresponding metabolite has lower abundance in the 0.15-SeM group. <sup>b</sup>Differences in metabolite abundances between the 0.15-SeM and 0.15-SeL groups were analyzed using one-way analysis of variance, followed by the Tukey's post hoc test.  $P < 0.05$  was considered as significant.

**Table S7 Significantly altered fecal metabolites in the 0.4-SeM/0.4-SeL comparison**

| Super-pathway        | Sub-pathway | Metabolites                                                                                                                                                                                | VIP value | FC <sup>a</sup> | P value <sup>b</sup> |
|----------------------|-------------|--------------------------------------------------------------------------------------------------------------------------------------------------------------------------------------------|-----------|-----------------|----------------------|
| Bile acid metabolism |             | 12alpha-Hydroxy-5beta-chol-3-en-24-oic Acid                                                                                                                                                | 6.47654   | 2.811598        | 0.000251             |
|                      |             | 27-Norcholestanehexol                                                                                                                                                                      | 1.11839   | 0.340178        | 6.22E-06             |
|                      |             | 3alpha,7alpha,12alpha-trihydroxy-27-carboxymethyl-5beta-cholestan-26-oic acid                                                                                                              | 1.02346   | 0.365031        | 0.031638             |
|                      |             | Chenodeoxycholic acid glycine conjugate                                                                                                                                                    | 3.01406   | 3.063198        | 0.002044             |
|                      |             | Tauroursodeoxycholic acid                                                                                                                                                                  | 1.12574   | 2.049367        | 0.001417             |
| Neurosubstances      |             | 12-HETE-GABA                                                                                                                                                                               | 6.29729   | 0.278152        | 0.003169             |
|                      |             | 5-Hydroxy-L-tryptophan                                                                                                                                                                     | 2.53347   | 2.543108        | 1.06E-05             |
|                      |             | 4-Acetamidobutanoic acid                                                                                                                                                                   | 1.69026   | 0.206727        | 0.014579             |
|                      |             | Ecgonine methyl ester                                                                                                                                                                      | 2.20517   | 0.337182        | 0.006742             |
|                      |             | Gabapentin                                                                                                                                                                                 | 1.16537   | 0.254905        | 0.005073             |
|                      |             | N-arachidonoyl GABA                                                                                                                                                                        | 1.64158   | 0.333583        | 0.001213             |
|                      |             | N-docosahexaenoyl GABA                                                                                                                                                                     | 2.99481   | 2.839085        | 0.002546             |
|                      |             | Norepinephrine sulfate                                                                                                                                                                     | 1.02108   | 14.64516        | 0.019446             |
| Vitamins             | Vitamin D   | (17E)-1alpha,25-dihydroxy-26,27-dimethyl-17,20,22,22,23,23-hexadehydro-24a-homovitamin D3 / (17E)-1alpha,25-dihydroxy-26,27-dimethyl-17,20,22,22,23,23-hexadehydro-24a-homocholecalciferol | 1.8254    | 2.778742        | 0.002759             |

|                         |                                                        |                                                                                                                                                        |          |          |          |
|-------------------------|--------------------------------------------------------|--------------------------------------------------------------------------------------------------------------------------------------------------------|----------|----------|----------|
|                         |                                                        | (22E)-26,26,26,27,27,27-hexafluoro-25-hydroxy-22,23-didehydrovitamin D3 / (22E)-26,26,26,27,27,27-hexafluoro-25-hydroxy-22,23-didehydrocholecalciferol | 4.87512  | 0.30144  | 0.014411 |
|                         |                                                        | (23R,25R)-25-hydroxyvitamin D3 26,23-lactone / (23R,25R)-25-hydroxycholecalciferol 26,23-lactone                                                       | 3.0928   | 10.22713 | 1.29E-05 |
|                         |                                                        | (23S)-1alpha-hydroxy-25,27-didehydrovitamin D3 26,23-lactone                                                                                           | 2.7228   | 0.382753 | 0.019073 |
|                         |                                                        | 1alpha,25-dihydroxy-19-nor-22-oxavitamin D3 / 1alpha,25-dihydroxy-19-nor-22-oxacholecalciferol                                                         | 2.18005  | 0.355821 | 0.000427 |
|                         |                                                        | 1alpha-hydroxy-2beta-(4-hydroxybutoxy)vitamin D3 / 1alpha-hydroxy-2beta-(4-hydroxybutoxy)cholecalciferol                                               | 1.0089   | 3.405688 | 0.008244 |
|                         |                                                        | 24,24-difluoro-1alpha,25-dihydroxy-26,27-dimethyl-24a-homovitamin D3 / 24,24-difluoro-1alpha,25-dihydroxy-26,27-dimethyl-24a-homocholecalciferol       | 3.07961  | 0.494584 | 0.000193 |
|                         |                                                        | 26,26,26-trifluoro-25-hydroxy-27-norvitamin D3 / 26,26,26-trifluoro-25-hydroxy-27-norcholecalciferol                                                   | 1.78807  | 4.470322 | 9.2E-07  |
|                         |                                                        | C-9,11,21-Trisnor-17-methyl-1alpha,25-dihydroxyvitamin D3                                                                                              | 1.25733  | 0.234061 | 9.49E-05 |
|                         | Vitamin B6                                             | 4-Pyridoxic acid                                                                                                                                       | 1.06551  | 0.479468 | 0.027984 |
|                         | Vitamin H                                              | Biotin                                                                                                                                                 | 1.28105  | 0.226647 | 0.02472  |
| Amino acids             | Glycine                                                | Hippuric acid                                                                                                                                          | 1.24722  | 0.278489 | 0.017885 |
|                         |                                                        | 4-Aminohippuric acid                                                                                                                                   | 1.27558  | 0.190354 | 0.004781 |
|                         |                                                        | Nicotinuric acid                                                                                                                                       | 1.34597  | 0.226602 | 0.017578 |
|                         |                                                        | Isovalerylglycine                                                                                                                                      | 2.24295  | 0.304888 | 0.002805 |
|                         | Serine                                                 | Serratamic acid                                                                                                                                        | 1.30424  | 3.587943 | 7.93E-07 |
|                         |                                                        | N-(3-(15-methyl-hexadecanoyloxy)-13-methyl-tetradecanoyl)-L-serine                                                                                     | 1.20051  | 3.639548 | 0.000124 |
|                         |                                                        | N-(3-oxododecanoyl) homoserine lactone                                                                                                                 | 1.45963  | 5.72078  | 0.001265 |
|                         | Phenylalanine                                          | L-Aspartyl-L-phenylalanine                                                                                                                             | 1.20904  | 0.405374 | 0.000159 |
|                         | Pentapeptide                                           | APGPR Enterostatin                                                                                                                                     | 1.59617  | 0.163574 | 0.003522 |
|                         | Aspartic acid                                          | N-oleoyl asparagine                                                                                                                                    | 1.18762  | 0.459977 | 1E-06    |
|                         | Methionine                                             | N-palmitoyl methionine                                                                                                                                 | 2.3864   | 0.44707  | 8.3E-07  |
|                         | Arginine                                               | L-Arginine                                                                                                                                             | 3.08161  | 0.384338 | 0.046818 |
|                         | Tryptophan metabolism                                  | Xanthurenic acid                                                                                                                                       | 4.06497  | 0.21178  | 0.00276  |
| Lysine derivatives      | Homocitrulline                                         | 1.92478                                                                                                                                                | 3.028259 | 1.68E-06 |          |
| Carbohydrate metabolism |                                                        | (-)-menthyl beta-D-glucoside                                                                                                                           | 2.01677  | 2.089462 | 8.78E-06 |
|                         |                                                        | L-Malic acid                                                                                                                                           | 3.87644  | 6.222569 | 0.001314 |
| Nucleic acid metabolism |                                                        | Adenosine                                                                                                                                              | 1.94461  | 2.763653 | 0.001697 |
|                         |                                                        | Cytosine                                                                                                                                               | 2.31303  | 0.402554 | 0.000289 |
|                         |                                                        | Thymidine                                                                                                                                              | 3.48431  | 2.892382 | 0.000365 |
|                         |                                                        | Uric acid                                                                                                                                              | 1.44402  | 0.110322 | 9.54E-09 |
| Fatty acids             | Long chain unsaturated fatty acids and their derivates | 12S-hydroxy-16-heptadecynoic acid                                                                                                                      | 1.31438  | 2.136076 | 0.001772 |
|                         |                                                        | 11-hydroperoxy-12,13-epoxy-9-octadecenoic acid                                                                                                         | 8.29529  | 2.469887 | 0.002446 |
|                         | Long chain unsaturated fatty acids and their derivates | 12-oxo-14,18-dihydroxy-9Z,13E,15Z-octadecatrienoic acid                                                                                                | 3.94919  | 2.177596 | 0.000264 |
|                         |                                                        | 13-keto-9Z,11E,15Z-octadecatrienoic acid                                                                                                               | 9.08854  | 2.115562 | 0.000561 |

|  |                                                      |                                                                        |         |          |          |
|--|------------------------------------------------------|------------------------------------------------------------------------|---------|----------|----------|
|  |                                                      | 14,15-DiHETrE                                                          | 1.32509 | 0.467916 | 0.001187 |
|  |                                                      | 18-fluoro-9Z-octadecenoic acid                                         | 1.11917 | 0.201485 | 6.52E-06 |
|  |                                                      | 24:3(15Z,18Z,21Z)                                                      | 2.51429 | 0.214741 | 6.91E-05 |
|  |                                                      | 28:3(5Z,9Z,21Z)                                                        | 1.28701 | 2.207903 | 2.28E-05 |
|  |                                                      | 3E,5E-tridecadienoic acid                                              | 3.58926 | 0.460008 | 4.64E-05 |
|  |                                                      | 8,11,14-Eicosatrienoic acid                                            | 2.88509 | 0.483278 | 0.000175 |
|  |                                                      | 9,12,13-TriHOME                                                        | 1.86826 | 8.135563 | 4.64E-06 |
|  |                                                      | 9S-HpOTrE                                                              | 5.62679 | 2.35879  | 0.000159 |
|  |                                                      | Eicosenoic acid                                                        | 4.25078 | 3.038308 | 3.32E-07 |
|  |                                                      | Vaccenic acid                                                          | 2.38527 | 0.441766 | 1.08E-05 |
|  | Long chain saturated fatty acids and their derivates | 13-hydroxy-tridecanoic acid                                            | 1.9042  | 6.896806 | 2.52E-08 |
|  |                                                      | 14-hydroxy-heneicosanoic acid                                          | 1.95845 | 0.21367  | 0.000176 |
|  |                                                      | 15-hydroxy-pentadecanoic acid                                          | 1.40014 | 0.437632 | 0.008687 |
|  |                                                      | 20-oxo-heneicosanoic acid                                              | 4.10972 | 0.216423 | 5.57E-05 |
|  |                                                      | 21-hydroxy-heneicosanoic acid                                          | 1.0506  | 0.499762 | 0.00087  |
|  |                                                      | 3-bromohexadecanoic acid                                               | 1.16056 | 0.368702 | 0.008375 |
|  |                                                      | Heptadecanoic acid                                                     | 4.04576 | 2.08861  | 0.006919 |
|  |                                                      | Pristanic acid                                                         | 3.95653 | 3.150009 | 0.002455 |
|  |                                                      | Sativic acid                                                           | 2.38836 | 4.879585 | 3.2E-05  |
|  | Medium chain fatty acids and their derivates         | 10-undecynoic acid                                                     | 1.31045 | 3.054431 | 0.000601 |
|  |                                                      | 2,6-nonadienoic acid                                                   | 2.41155 | 2.095623 | 6.97E-06 |
|  |                                                      | 2E,4E,8Z,10E-dodecatetraenoic acid                                     | 1.90781 | 2.817639 | 8.68E-05 |
|  |                                                      | 2-hydroxy-10-undecenoic acid                                           | 4.2052  | 3.245082 | 7.52E-05 |
|  |                                                      | 5-oxo-7-octenoic acid                                                  | 2.6653  | 0.258704 | 0.009019 |
|  |                                                      | 2-hydroxy pelargonic acid                                              | 2.79336 | 5.608216 | 1.83E-06 |
|  |                                                      | 3,6-dioxo-decanoic acid                                                | 1.3678  | 2.49998  | 0.001064 |
|  |                                                      | 3-O-(2-O-(2E-decenoyl)-alpha-L-rhamnopyranosyl)-3-hydroxydecanoic acid | 1.16241 | 2.77458  | 0.004235 |
|  |                                                      | 3-O-alpha-L-rhamnopyranosyl-3-hydroxydecanoic acid                     | 1.69257 | 2.029412 | 7.85E-06 |
|  |                                                      | 3-O-alpha-L-rhamnopyranosyl-3-hydroxydecanoyl-3-hydroxydecanoic acid   | 1.00195 | 2.642189 | 0.000486 |
|  |                                                      | 9,12-dioxo-dodecanoic acid                                             | 4.04483 | 3.137825 | 9.51E-05 |
|  |                                                      | methyl 8-[2-(2-formyl-vinyl)-3-hydroxy-5-oxo-cyclopentyl]-octanoate    | 1.26441 | 3.046238 | 1.37E-05 |
|  | Short chain fatty acid derivatives                   | Mevalonic acid                                                         | 1.21463 | 2.200159 | 0.003354 |
|  | Diprotic acid and their derivatives                  | 2-methyl-hexadecanedioic acid                                          | 3.15365 | 2.324072 | 0.006439 |
|  |                                                      | 2-methyl-tridecanedioic acid                                           | 1.19167 | 10.90055 | 4.57E-08 |
|  |                                                      | 3-hydroxy-dodecanedioic acid                                           | 2.8767  | 2.62862  | 0.000159 |
|  |                                                      | 3-hydroxy-tetradecanedioic acid                                        | 1.99426 | 2.152979 | 0.001907 |
|  |                                                      | 9,10-dihydroxy-Octadecanedioic acid                                    | 2.63023 | 4.413756 | 2.83E-08 |
|  |                                                      | Azelaic acid                                                           | 1.97039 | 2.560911 | 0.001882 |
|  |                                                      | Dodecanedioic acid                                                     | 1.19087 | 2.605516 | 0.005525 |
|  |                                                      | Heneicosanedioic acid                                                  | 2.26421 | 0.193885 | 0.000143 |

|                         |                             |                                                                          |          |          |          |
|-------------------------|-----------------------------|--------------------------------------------------------------------------|----------|----------|----------|
|                         |                             | Hexacosanedioic acid                                                     | 1.43296  | 0.092231 | 0.000774 |
| Lipid metabolism        | Lipid biosynthesis          | Hexanoylcarnitine                                                        | 1.23262  | 0.355708 | 0.000265 |
|                         |                             | Isobutyryl-L-carnitine                                                   | 1.12919  | 0.447748 | 0.001044 |
|                         |                             | L-Acetylcarnitine                                                        | 13.1806  | 2.015422 | 0.000238 |
|                         |                             | Propionylcarnitine                                                       | 1.55468  | 2.107986 | 0.00746  |
|                         |                             | Tiglylcarnitine                                                          | 1.43487  | 0.189223 | 0.003377 |
|                         | Cholesterol and derivatives | (25S)-5alpha-cholestan-3beta,6alpha,7beta,8beta,15alpha,16beta,26-heptol | 3.6951   | 3.419886 | 0.00016  |
|                         |                             | 15,20-dihydroxycholest-4,14-dien-3,16-dione                              | 4.14582  | 6.696632 | 3.68E-05 |
|                         |                             | 24-Hydroxycholesterol                                                    | 1.66802  | 3.202702 | 0.000273 |
|                         |                             | 3beta-hydroxy-4beta-methyl-5alpha-cholest-7-ene-4alpha-carbaldehyde      | 1.23662  | 0.394269 | 1.1E-07  |
|                         |                             | 5alpha-cholestan-3beta,6alpha,8beta,15alpha,24S-triol                    | 4.47277  | 0.197227 | 3.26E-05 |
|                         |                             | Herbasterol                                                              | 1.40615  | 0.360264 | 0.000732 |
|                         | Glycerophosphoglycerols     | PG(13:0/0:0)                                                             | 1.09173  | 0.380068 | 0.00109  |
|                         |                             | PG(13:0/22:0)                                                            | 1.38256  | 3.309614 | 0.000173 |
|                         |                             | PG(15:0/0:0)                                                             | 1.5836   | 0.450488 | 0.021966 |
|                         |                             | PG(18:0/0:0)                                                             | 2.36958  | 2.681771 | 9.28E-06 |
|                         |                             | PG(18:1(9Z)/0:0)                                                         | 2.07314  | 0.483077 | 0.015091 |
|                         |                             | PG(18:3(6Z,9Z,12Z)/0:0)                                                  | 1.07152  | 3.864389 | 0.000324 |
|                         |                             | PG(20:2(11Z,14Z)/0:0)                                                    | 1.33686  | 0.391506 | 0.000863 |
|                         |                             | PG(21:0/0:0)                                                             | 1.76835  | 4.442165 | 2.08E-08 |
|                         |                             | PG(22:1(11Z)/0:0)                                                        | 2.16681  | 0.243833 | 0.003308 |
|                         |                             | PG(O-16:0/17:2(9Z,12Z))                                                  | 1.47788  | 4.138596 | 0.004399 |
|                         |                             | PG(P-16:0/0:0)                                                           | 18.5157  | 0.447495 | 6.29E-06 |
|                         | Diradylglycerols            | DG(13:0/18:2(9Z,12Z)/0:0)[iso2]                                          | 2.27941  | 0.429562 | 2.93E-05 |
|                         |                             | DG(13:0/20:5(5Z,8Z,11Z,14Z,17Z)/0:0)[iso2]                               | 2.80845  | 0.376806 | 1.09E-05 |
|                         |                             | DG(15:0/16:0/0:0)                                                        | 1.01928  | 3.144933 | 0.000302 |
|                         |                             | DG(15:0/16:1(9Z)/0:0)                                                    | 2.917    | 0.367112 | 4.99E-06 |
|                         |                             | DG(15:0/18:3(6Z,9Z,12Z)/0:0)                                             | 2.1665   | 0.313649 | 5.21E-06 |
|                         |                             | DG(17:2(9Z,12Z)/22:4(7Z,10Z,13Z,16Z)/0:0)[iso2]                          | 3.61668  | 0.434258 | 5.42E-05 |
|                         |                             | DG(17:2(9Z,12Z)/22:5(7Z,10Z,13Z,16Z,19Z)/0:0)[iso2]                      | 1.14697  | 0.33793  | 0.000166 |
|                         | Glycerophosphates           | PA(18:0/0:0)                                                             | 5.45442  | 0.48253  | 0.015483 |
|                         |                             | PA(20:0/0:0)                                                             | 5.29898  | 0.462234 | 0.007743 |
|                         |                             | PA(22:1(11Z)/0:0)                                                        | 1.38586  | 0.34619  | 0.032327 |
| PA(O-16:0/12:0)         |                             | 1.9978                                                                   | 0.059234 | 0.000179 |          |
| PA(O-16:0/14:1(9Z))     |                             | 1.03933                                                                  | 0.272106 | 7.79E-06 |          |
| PA(P-16:0/14:1(9Z))     |                             | 3.87987                                                                  | 0.159681 | 5.26E-05 |          |
| PA(P-16:0/15:1(9Z))     |                             | 1.15927                                                                  | 0.327589 | 0.000394 |          |
| PA(P-18:0/17:2(9Z,12Z)) |                             | 1.18356                                                                  | 0.418858 | 0.001499 |          |
| Glycerophosphocholine   | LysoPC(P-18:0)              | 1.32647                                                                  | 0.489958 | 0.04805  |          |
|                         | PC(12:0/12:0)               | 1.09621                                                                  | 0.035984 | 0.000124 |          |

|  |                             |                                                                                 |         |          |          |
|--|-----------------------------|---------------------------------------------------------------------------------|---------|----------|----------|
|  |                             | PC(9:0/0:0)                                                                     | 1.87375 | 0.079881 | 0.00015  |
|  |                             | PC(O-16:0/0:0)                                                                  | 4.03704 | 0.340236 | 0.028169 |
|  |                             | PC(O-8:0/O-8:0)                                                                 | 1.3516  | 0.354695 | 0.023776 |
|  | Glycerophosphoethanolamines | PE(12:0/15:1(9Z))                                                               | 1.0076  | 0.077228 | 0.000214 |
|  |                             | PE(15:0/18:3(6Z,9Z,12Z))                                                        | 1.05741 | 0.394374 | 2.57E-06 |
|  |                             | PE(18:2(9Z,12Z)/0:0)                                                            | 1.02192 | 3.338561 | 4.97E-05 |
|  |                             | PE(18:4(6Z,9Z,12Z,15Z)/18:4(6Z,9Z,12Z,15Z))                                     | 1.67561 | 0.187594 | 7.31E-06 |
|  | Glycerophosphoserines       | PS(12:0/15:0)                                                                   | 1.14042 | 0.050414 | 0.000174 |
|  |                             | PS(14:1(9Z)/20:5(5Z,8Z,11Z,14Z,17Z))                                            | 1.98709 | 0.423466 | 6.26E-06 |
|  |                             | PS(14:1(9Z)/22:6(4Z,7Z,10Z,13Z,16Z,19Z))                                        | 1.60736 | 0.122793 | 0.000208 |
|  |                             | PS(15:0/22:2(13Z,16Z))                                                          | 3.14225 | 2.542123 | 0.000565 |
|  |                             | PS(O-16:0/18:3(9Z,12Z,15Z))                                                     | 1.39079 | 0.390676 | 0.00101  |
|  | Steroids/ Sterols           | (20S,24S)-24-ethylthornasterol                                                  | 1.34409 | 0.470274 | 0.002317 |
|  |                             | 16-a-Hydroxypregnenolone                                                        | 1.14055 | 0.328858 | 0.000572 |
|  |                             | 20,26-dihydroxyecdysone                                                         | 2.43645 | 2.766946 | 0.003663 |
|  |                             | 22-deoxy-20,21-dihydroxyecdysone                                                | 5.34434 | 3.255316 | 0.001196 |
|  |                             | 27-nor-campestan-3beta,4beta,5alpha,6alpha,7beta,8beta,14alpha,15alpha,24-nonol | 2.45186 | 0.246816 | 7.5E-06  |
|  |                             | 29-demethylgeodisterol-O-sulfite                                                | 2.08168 | 0.145391 | 0.024346 |
|  |                             | 6-deoxoteasterone                                                               | 1.29031 | 2.727758 | 0.002682 |
|  |                             | Campesterol                                                                     | 1.40358 | 8.100639 | 8.83E-11 |
|  |                             | cimicifoetiside B                                                               | 1.23711 | 2.4368   | 0.002422 |
|  |                             | Cucurbitacin D                                                                  | 2.13648 | 2.156043 | 0.003738 |
|  |                             | Hydrocortisone cypionate                                                        | 3.49639 | 2.849681 | 4.59E-05 |
|  |                             | Kammogenin                                                                      | 2.97614 | 2.066764 | 0.002048 |
|  |                             | Minabeolide-4                                                                   | 1.65909 | 12.43375 | 3.05E-05 |
|  |                             | Tetrahydrodeoxycorticosterone                                                   | 2.73481 | 0.287802 | 0.000394 |
|  |                             | Theonellasterol D                                                               | 2.07082 | 2.004003 | 0.006766 |
|  |                             | Xeniasterol-b                                                                   | 1.15751 | 0.263416 | 6.69E-09 |
|  |                             | Ximaosteroid C                                                                  | 2.62136 | 2.664539 | 0.000658 |
|  | Isoprenoids                 | (-)-Fusidic acid                                                                | 1.45586 | 0.066513 | 0.000103 |
|  |                             | (-)-Jolkinol A                                                                  | 2.01034 | 6.091185 | 1.52E-05 |
|  |                             | 19-(3-methyl-butanoyloxy)-villanovane-13alpha,17-diol                           | 1.13133 | 0.356608 | 4.54E-05 |
|  |                             | 5-(1-hydroxypropan-2-yl)isolongifol-4-ene                                       | 3.05805 | 0.386003 | 0.002457 |
|  |                             | C25:2 6,7-Epoxy highly branched isoprenoid                                      | 1.56225 | 0.202187 | 2.62E-05 |
|  |                             | forskolin                                                                       | 2.01101 | 2.128276 | 0.000927 |
|  |                             | gibberellin A17                                                                 | 1.60981 | 4.673945 | 0.000654 |
|  |                             | Japonicumins A                                                                  | 1.61946 | 3.127666 | 0.011503 |
|  |                             | Ketospiriloxanthin                                                              | 1.09233 | 3.854058 | 0.011617 |
|  |                             | Moronic acid                                                                    | 1.44701 | 0.219209 | 0.000113 |
|  |                             | Rhodoxanthin                                                                    | 1.59553 | 0.02089  | 1.4E-08  |

|                       |                            |                                                             |         |          |          |
|-----------------------|----------------------------|-------------------------------------------------------------|---------|----------|----------|
|                       | Sphingolipids/ sphingosine | Cer(d18:0/13:0)                                             | 1.00904 | 2.12405  | 0.000745 |
|                       |                            | Cer(d18:0/14:0)                                             | 1.84458 | 6.890001 | 4.25E-06 |
|                       |                            | Sphinganine                                                 | 11.2087 | 2.586811 | 0.000685 |
|                       |                            | Spisulosine                                                 | 2.48007 | 2.49487  | 1.1E-05  |
|                       | Glycosyldiradylglycerols   | MGDG(18:5(3Z,6Z,9Z,12Z,15Z)/18:4(6Z,9Z,12Z,15Z))            | 3.56462 | 4.075042 | 0.001311 |
|                       | Other                      | 15-HETE-G                                                   | 1.25366 | 0.455931 | 5.83E-06 |
| Incretions            |                            | 11-dehydro-2,3-dinor-TXB2                                   | 1.20414 | 2.782206 | 0.000117 |
|                       |                            | 11-deoxy-16,16-dimethyl-PGE2                                | 1.66029 | 0.380777 | 4.87E-05 |
|                       |                            | 15R-PGE2 methyl ester, 15-acetate                           | 1.15447 | 2.785809 | 0.000103 |
|                       |                            | 18-Oxocortisol                                              | 1.3986  | 2.399231 | 0.000242 |
|                       |                            | 1a,1b-dihomo-PGE2                                           | 2.44566 | 0.306106 | 0.001141 |
|                       |                            | 3b,17b-Dihydroxyetiocholane                                 | 4.47233 | 2.708955 | 0.018512 |
|                       |                            | Androsterone                                                | 1.43509 | 2.137605 | 0.02097  |
|                       |                            | C22-PGF4alpha                                               | 1.61455 | 0.214107 | 0.000826 |
|                       |                            | Estrone                                                     | 1.08339 | 0.098192 | 0.000909 |
|                       |                            | Jasmonic acid                                               | 2.88291 | 2.932751 | 7.8E-05  |
|                       |                            | Nandrolone                                                  | 1.03861 | 2.186078 | 0.001422 |
|                       |                            | Prostaglandin F1a                                           | 2.1804  | 2.446682 | 1.68E-05 |
| Amides                |                            | Anandamide (22:6, n-3)                                      | 1.27217 | 0.47385  | 0.0079   |
|                       |                            | Margaroyl-EA                                                | 3.77403 | 2.418226 | 5.91E-05 |
|                       |                            | Oleamide                                                    | 4.08377 | 0.349365 | 8.67E-05 |
|                       |                            | Palmitoleoyl-EA                                             | 1.04008 | 0.18414  | 0.00063  |
| Ketones               |                            | 12-Tridecen-2-one                                           | 1.22552 | 2.194226 | 0.021471 |
|                       |                            | 5,5'-Dihydroxy-3,6,7,2',4'-pentamethoxyflavone 5'-glucoside | 1.44651 | 0.496222 | 2.14E-05 |
|                       |                            | cis-Jasmone                                                 | 1.42912 | 3.02993  | 0.000104 |
|                       |                            | Repensol3,7,9-Trihydroxycoumestan                           | 1.24551 | 3.263273 | 0.005993 |
|                       |                            | Ulexone B                                                   | 1.2354  | 0.3917   | 0.039145 |
|                       |                            | zymosterol intermediate 1c                                  | 1.60358 | 0.472279 | 1.65E-07 |
| Alkanes/ Hydrocarbons |                            | 2,4-Dimethyl-2E,4E-hexadien-1-ol                            | 4.09094 | 0.268854 | 0.01521  |
|                       |                            | 3,5-Di-O-methyl-8-prenylafzelechin-4beta-ol                 | 3.97163 | 0.440696 | 0.026404 |
|                       |                            | 3,7,11-Trimethyl-6E,10-dodecadien-1-ol                      | 4.15307 | 0.147623 | 8.45E-05 |
|                       |                            | 3Z,13Z-octadecadien-1-ol                                    | 5.46838 | 2.618402 | 0.000725 |
|                       |                            | Dryopterin                                                  | 1.22795 | 0.352479 | 0.002114 |
|                       |                            | Falcarindiol                                                | 1.47493 | 2.772684 | 0.000165 |
|                       |                            | Hydroxytyrosol                                              | 1.70502 | 0.259461 | 0.011991 |
|                       |                            | 14S-Methyl-1-octadecene                                     | 1.63874 | 0.262973 | 0.000258 |
|                       |                            | 3Z,6Z,9Z-Octadecatriene                                     | 1.34764 | 2.531684 | 0.000564 |
|                       |                            | 4Z,8Z-Heptadecadiene                                        | 1.27434 | 2.927974 | 0.000312 |
|                       |                            | 6-Ethyl-4-methyl-3E,5E,7E-decatriene                        | 1.01416 | 2.25116  | 0.019285 |
|                       |                            | 7-Ethyl-3,11-dimethyl-1,3Z,6E,10-tridecatetraene            | 1.45864 | 2.709998 | 2.05E-05 |

|             |                                              |         |          |          |
|-------------|----------------------------------------------|---------|----------|----------|
| Aldehydes   | 10Z-Nonadecenal                              | 1.59361 | 3.405558 | 0.002801 |
|             | 2-decene-4,6,8-triyn-1-al                    | 1.06716 | 0.328586 | 0.001366 |
|             | Nonadecanal                                  | 1.18589 | 5.081851 | 4.2E-05  |
|             | 4-Hydroxynonenal                             | 1.41105 | 2.08862  | 9.2E-05  |
| Phenols     | p-Cresol sulfate                             | 3.85549 | 0.384081 | 0.00495  |
|             | Thymol                                       | 1.25663 | 2.178806 | 0.000442 |
| Antibiotics | Glycyrrhetic acid                            | 1.40838 | 0.206781 | 1.76E-06 |
| Esters      | phorbol 13-acetate 12-myristate              | 2.54865 | 3.067039 | 0.002731 |
| Alcohols    | 2,6,8,12-Tetramethyl-2,4-tridecadien-1-ol    | 2.24003 | 2.179889 | 0.006216 |
|             | 11Z-eicosen-1-ol                             | 1.38584 | 2.617502 | 0.048721 |
| Others      | 20-acetoxy-clavulone I                       | 1.51929 | 0.470837 | 5.35E-07 |
|             | 2-Aminobenzoic acid                          | 1.00218 | 0.299932 | 0.004482 |
|             | 2R-HpOTrE                                    | 1.57856 | 3.307703 | 0.001589 |
|             | 30,32-dihydroxy-2b-methyl-bishomohopane      | 2.17546 | 0.182189 | 7.66E-06 |
|             | 31-hydroxy-32,35-anhydrobacteriohopanetetrol | 4.24197 | 0.378775 | 1.14E-05 |
|             | all-trans-heptaprenyl diphosphate            | 3.78288 | 0.118924 | 3.71E-07 |
|             | Bufalin                                      | 2.84451 | 2.367503 | 0.001208 |
|             | Coproporphyrin III                           | 6.02306 | 0.190126 | 1.6E-07  |
|             | Creatinine                                   | 3.75189 | 0.280939 | 0.008226 |
|             | Deoxy pyridinoline                           | 2.12584 | 2.365123 | 0.000348 |
|             | Kynurenic acid                               | 1.80473 | 0.274545 | 0.007071 |
|             | Onocerin                                     | 1.24831 | 0.337667 | 5.36E-06 |
|             | Protoporphyrin IX                            | 1.08095 | 0.11919  | 0.003458 |

<sup>a</sup>The difference in the abundance of each metabolite is expressed as the ratio of its average content in the 0.40-SeM group and in the 0.40-SeL group (0.40-SeM/0.40-SeL). A ratio of >1 indicates that the corresponding metabolite had higher abundance in the 0.40-SeM group, whereas a ratio of <1 indicates that the corresponding metabolite has lower abundance in the 0.40-SeM group. <sup>b</sup>Differences in metabolite abundances between the 0.40-SeM and 0.40-SeL groups were analyzed using one-way analysis of variance, followed by the Tukey's post hoc test.  $P < 0.05$  was considered as significant.

**Table S8 Differentially expressed proteins in the Se-D/0.15-SeL comparison**

| Accession <sup>a</sup> | Description <sup>b</sup>                                                | FC <sup>c</sup> | P value <sup>d</sup> |
|------------------------|-------------------------------------------------------------------------|-----------------|----------------------|
| B1Q450                 | HBB1; Hemoglobin beta chain subunit                                     | 1.98            | 0.0007               |
| Q8CGP0                 | Hist3h2bb; Histone H2B type 3-B                                         | 1.25            | 0.0129               |
| P11352                 | Gpx1; Glutathione peroxidase 1                                          | 0.75            | 0.0000               |
| A0A075B5S2             | Ighv7-1; Uncharacterized protein (Fragment)                             | 0.61            | 0.0499               |
| A0A0A6YXN4             | Ighv1-18; Immunoglobulin heavy variable V1-18                           | 0.81            | 0.0081               |
| P34928                 | Apoc1; Apolipoprotein C-I                                               | 1.21            | 0.0073               |
| I6L998                 | N/A; Uncharacterized protein                                            | 1.58            | 0.0414               |
| Q3TBL6                 | Tnfaip8l3; Tumor necrosis factor alpha-induced protein 8-like protein 3 | 0.80            | 0.0015               |

|            |                                                              |      |        |
|------------|--------------------------------------------------------------|------|--------|
| A0A1E1GJG6 | Wgn-scFv; Single-chain variable                              | 0.67 | 0.0023 |
| Q9CZH7     | Mxra7; Matrix-remodeling-associated protein 7                | 0.83 | 0.0334 |
| F7BJB9     | Morc3; MORC family CW-type zinc finger protein 3             | 0.76 | 0.0422 |
| X5J5N0     | N/A; IgM heavy chain VDJ region                              | 1.29 | 0.0294 |
| Q924Q3     | Ighm; VH186.2-D-J-C mu protein                               | 0.62 | 0.0329 |
| P0C7N9     | Psmg4; Proteasome assembly chaperone 4                       | 0.81 | 0.0011 |
| E9PWN0     | Lpin2; Phosphatidate phosphatase LPIN2                       | 0.79 | 0.0467 |
| Q8R2H9     | Phospho1; Phosphoethanolamine/phosphocholine phosphatase     | 0.82 | 0.0256 |
| G5E8C6     | Vill; Villin-like protein                                    | 1.45 | 0.0081 |
| E0CX47     | Nxpe5; Neurexophilin and PC-esterase domain family, member 5 | 0.79 | 0.0403 |

<sup>a</sup>The accession ID of each protein in the Uniprot database. <sup>b</sup>The gene name and protein description of each protein in the Uniprot database. <sup>c</sup>The fold change value of each differentially expressed protein in the Se-D/0.15-SeL comparison. <sup>d</sup>Differences in protein abundances between the Se-D and 0.15-SeL groups were analyzed using one-way analysis of variance, followed by the Tukey's post hoc test.  $P < 0.05$  was considered as significant. The value 0 indicates  $P < 0.0001$ .

**Table S9 Differentially expressed proteins in the 0.40-SeL/0.15-SeL comparison**

| Accession <sup>a</sup> | Description <sup>b</sup>                                          | FC <sup>c</sup> | P value <sup>d</sup> |
|------------------------|-------------------------------------------------------------------|-----------------|----------------------|
| F6V2H5                 | Vill1; Villin-1 (Fragment)                                        | 0.79            | 0.0392               |
| B1Q450                 | HBB1; Hemoglobin beta chain subunit                               | 1.92            | 0.0081               |
| P16015                 | Ca3; Carbonic anhydrase 3                                         | 1.31            | 0.0349               |
| P19639                 | Gstm3; Glutathione S-transferase Mu 3                             | 0.81            | 0.0023               |
| Q3UKA4                 | Adh1; Alcohol dehydrogenase 1 (Class I), isoform CRA_c            | 0.81            | 0.0078               |
| P13745                 | Gsta1; Glutathione S-transferase A1                               | 0.74            | 0.0012               |
| F6XWD4                 | Ppp1r12c; Protein phosphatase 1 regulatory subunit 12C (Fragment) | 0.81            | 0.0340               |
| G3X9Y6                 | Akr1c19; Aldo-keto reductase family 1, member C19                 | 0.83            | 0.0002               |
| P09528                 | Fth1; Ferritin heavy chain                                        | 0.82            | 0.0460               |
| P24472                 | Gsta4; Glutathione S-transferase A4                               | 0.79            | 0.0026               |
| O09049                 | Reg3g; Regenerating islet-derived protein 3-gamma                 | 1.49            | 0.0002               |
| Q9D8L4                 | N/A; Uncharacterized protein                                      | 0.82            | 0.0418               |
| Q8C1N8                 | Defa22; Alpha-defensin 22                                         | 1.53            | 0.0428               |
| A0A075B5K2             | Igkv9-124; Immunoglobulin kappa chain variable 9-124              | 0.57            | 0.0287               |
| Q0PD10                 | Rab43; RIKEN cDNA 1810048P08, isoform CRA_c                       | 0.79            | 0.0300               |
| Q3UEN8                 | Cyp3a11; MCG15287                                                 | 0.82            | 0.0291               |
| Q08ED0                 | Bcl2l15; Bcl-2-like protein 15                                    | 1.27            | 0.0026               |
| A0A075B5Y4             | Ighv1-81; Immunoglobulin heavy variable 1-81                      | 0.77            | 0.0066               |



|            |                                                                                        |      |        |
|------------|----------------------------------------------------------------------------------------|------|--------|
| Q9QX60     | Dguok; Deoxyguanosine kinase, mitochondrial                                            | 0.81 | 0.0200 |
| Q3UYR3     | Cbfb; Putative uncharacterized protein (Fragment)                                      | 0.79 | 0.0230 |
| P35230     | Reg3b; Regenerating islet-derived protein 3-beta                                       | 1.82 | 0.0003 |
| Q8VI47     | Abcc2; Canalicular multispecific organic anion transporter 1                           | 0.82 | 0.0499 |
| A0A0G2JFE9 | Ighv1-76; Immunoglobulin heavy variable 1-76 (Fragment)                                | 0.79 | 0.0050 |
| Q3TBL6     | Tnfaip8l3; Tumor necrosis factor alpha-induced protein 8-like protein 3                | 0.82 | 0.0050 |
| P28667     | Marcks1l; MARCKS-related protein                                                       | 0.81 | 0.0001 |
| Q8K205     | Pop1; Processing of 1, ribonuclease P/MRP family, (S. cerevisiae)                      | 0.81 | 0.0495 |
| A0A1E1GJG6 | Wgn-scFv; Single-chain variable                                                        | 0.65 | 0.0014 |
| Q3UP47     | Cfd; Complement factor D (Adipsin)                                                     | 0.81 | 0.0041 |
| P70410     | Gnl2; Nucleolar GTP-binding protein 2 (Fragment)                                       | 0.83 | 0.0135 |
| Q7TN79     | Akap7; A-kinase anchor protein 7 isoform gamma                                         | 0.83 | 0.0002 |
| J3QP43     | Stum; Protein stum homolog                                                             | 0.76 | 0.0029 |
| Q920L5     | Elovl6; Elongation of very long chain fatty acids protein 6                            | 0.82 | 0.0062 |
| D3Z689     | Adamts15; ADAMTS-like 5                                                                | 0.80 | 0.0445 |
| P42337     | Pik3ca; Phosphatidylinositol 4,5-bisphosphate 3-kinase catalytic subunit alpha isoform | 0.78 | 0.0457 |
| A5D6P2     | Pard3; Par-3 (Partitioning defective 3) homolog (C. elegans)                           | 0.81 | 0.0143 |
| Q9CZH7     | Mxra7; Matrix-remodeling-associated protein 7                                          | 0.82 | 0.0273 |
| Q9QYS9     | Qki; Protein quaking                                                                   | 0.82 | 0.0161 |
| Q9WV38     | Slc2a5; Solute carrier family 2, facilitated glucose transporter member 5              | 0.73 | 0.0032 |
| A0A0B4J1I9 | Igkv4-55; Immunoglobulin kappa variable 4-55 (Fragment)                                | 0.78 | 0.0351 |
| E9QAU9     | Lrch3; Leucine-rich repeat and calponin homology domain-containing protein 3           | 0.79 | 0.0002 |
| Q6P9L6     | Kif15; Kinesin-like protein KIF15                                                      | 0.80 | 0.0317 |
| A0A0A0MQ99 | Swi5; DNA repair protein SWI5 homolog                                                  | 0.81 | 0.0376 |
| Q8R418     | Dicer1; Endoribonuclease Dicer                                                         | 0.82 | 0.0184 |
| P16054     | Prkce; Protein kinase C epsilon type                                                   | 0.82 | 0.0389 |
| Q3UGB8     | Der1l; Derlin                                                                          | 0.83 | 0.0460 |
| Q91VL8     | Terf2ip; Telomeric repeat-binding factor 2-interacting protein 1                       | 0.78 | 0.0080 |
| Q3V009     | Tmed1; Transmembrane emp24 domain-containing protein 1                                 | 0.81 | 0.0044 |
| Q924Q3     | Ighm; VH186.2-D-J-C mu protein (Fragment)                                              | 0.60 | 0.0251 |
| A0A0A6YXB7 | Ssr2; Translocon-associated protein subunit beta                                       | 1.35 | 0.0314 |
| P0C7N9     | Psmg4; Proteasome assembly chaperone 4                                                 | 0.81 | 0.0053 |
| E9PWN0     | Lpin2; Phosphatidate phosphatase LPIN2                                                 | 0.72 | 0.0289 |
| Q8CII2     | Cdc123; Cell division cycle protein 123 homolog                                        | 0.83 | 0.0317 |
| Q8R2H9     | Phospho1; Phosphoethanolamine/phosphocholine                                           | 0.77 | 0.0182 |

|        |                                                              |      |        |
|--------|--------------------------------------------------------------|------|--------|
|        | phosphatase                                                  |      |        |
| Q5F2D0 | Acs16; Putative uncharacterized protein                      | 0.82 | 0.0011 |
| Q3TV21 | Fxn; Frataxin                                                | 0.79 | 0.0217 |
| Q80ZM7 | Gtf2a2; Transcription initiation factor IIA subunit 2        | 1.31 | 0.0152 |
| J3QNH8 | Gm7694; Uncharacterized protein                              | 0.81 | 0.0499 |
| B2RPV6 | Mmrn1; Multimerin-1                                          | 0.80 | 0.0010 |
| O54788 | Dffb; DNA fragmentation factor subunit beta                  | 0.83 | 0.0350 |
| Q9D0I6 | Wdsub1; WD repeat, SAM and U-box domain-containing protein 1 | 0.79 | 0.0094 |
| E9QJT3 | Sft2d3; Vesicle transport protein                            | 0.83 | 0.0144 |
| G5E8C6 | Vill; Villin-like protein                                    | 2.00 | 0.0001 |
| Q9Z2D1 | Mtmr2; Myotubularin-related protein 2                        | 0.78 | 0.0171 |
| E0CX47 | Nxpe5; Neurexophilin and PC-esterase domain family, member 5 | 0.79 | 0.0393 |
| Q3TQY2 | Dctn4; Putative uncharacterized protein                      | 0.82 | 0.0199 |

<sup>a</sup>The accession ID of each protein in the Uniprot database. <sup>b</sup>The gene name and protein description of each protein in the Uniprot database. <sup>c</sup>The fold change value of each differentially expressed protein in the 0.40-SeL/0.15-SeL comparison. <sup>d</sup>Differences in protein abundances between the 0.40-SeL and 0.15-SeL groups were analyzed using one-way analysis of variance, followed by the Tukey's post hoc test.  $P < 0.05$  was considered as significant. The value 0 indicates  $P < 0.0001$ .

**Table S10 Differentially expressed proteins in the Se-D/0.15-SeM comparison**

| Accession <sup>a</sup> | Description <sup>b</sup>                                              | FC <sup>c</sup> | P value <sup>d</sup> |
|------------------------|-----------------------------------------------------------------------|-----------------|----------------------|
| Q3UBP6                 | Actb; Putative uncharacterized protein                                | 1.37            | 0.0005               |
| O88428                 | Papss2; Bifunctional 3'-phosphoadenosine 5'-phosphosulfate synthase 2 | 1.50            | 0.0015               |
| Q91Y97                 | Aldob; Fructose-bisphosphate aldolase B                               | 1.23            | 0.0270               |
| Q8BK48                 | Ces2e; Pyrethroid hydrolase Ces2e                                     | 1.21            | 0.0391               |
| E9Q5Z6                 | Adh6a; Alcohol dehydrogenase 6A (class V)                             | 1.29            | 0.0014               |
| P37804                 | Tagln; Transgelin                                                     | 0.81            | 0.0217               |
| E9QA16                 | Cald1; Caldesmon 1                                                    | 0.83            | 0.0231               |
| Q4FJX4                 | Csrp1; Csrp1 protein                                                  | 0.81            | 0.0185               |
| A2AEX6                 | Fhl1; Four and a half LIM domains protein 1                           | 0.83            | 0.0065               |
| Q91WG0                 | Ces2c; Acylcarnitine hydrolase                                        | 1.24            | 0.0230               |
| Q64464                 | Cyp3a13; Cytochrome P450 3A13                                         | 1.29            | 0.0026               |

|            |                                                                |      |        |
|------------|----------------------------------------------------------------|------|--------|
| A0A0J9YU79 | Khk; Ketohekinase                                              | 1.22 | 0.0043 |
| B1Q450     | B1Q450; Hemoglobin beta chain subunit                          | 2.39 | 0.0001 |
| F8VPQ6     | Alpi; Alkaline phosphatase                                     | 1.32 | 0.0328 |
| E9Q1Q9     | Khk; Ketohekinase                                              | 1.21 | 0.0106 |
| E9QNA7     | Sorbs1; Sorbin and SH3 domain                                  | 0.75 | 0.0100 |
| Q91WU0     | Sorbs1; Carboxylesterase 1F                                    | 1.21 | 0.0000 |
| Q9QXD6     | Fbp1; Fructose-1,6-bisphosphatase 1                            | 1.26 | 0.0016 |
| B9EK97     | Itln1; Itln1 protein                                           | 0.77 | 0.0217 |
| O08691     | Arg2; Arginase-2, mitochondrial                                | 1.24 | 0.0010 |
| Q3UKA4     | Adh1; Alcohol dehydrogenase 1 (Class I), isoform CRA_c         | 1.38 | 0.0000 |
| O88451     | Rdh7; Retinol dehydrogenase 7                                  | 1.23 | 0.0029 |
| Q8QZR3     | Ces2a; OS=Mus musculus GN=Ces2a PE=1 SV=1                      | 1.24 | 0.0021 |
| P13745     | Gsta1; Glutathione S-transferase A1                            | 1.34 | 0.0010 |
| D3YYJ7     | Mptx2; Pentaxin                                                | 0.75 | 0.0010 |
| G3X9Y6     | Akr1c19; Aldo-keto reductase family 1, member C19              | 1.23 | 0.0001 |
| Q99PG0     | Aadac; Arylacetamide deacetylase                               | 1.22 | 0.0020 |
| Q64435     | Ugt1a6; UDP-glucuronosyltransferase 1-6                        | 1.28 | 0.0074 |
| Q8CGP0     | Hist3h2bb; Histone H2B type 3-B                                | 1.28 | 0.0116 |
| P17897     | Lyz1; Lysozyme C-1                                             | 0.73 | 0.0150 |
| Q9WUD0     | Q9WUD0; Cytochrome P450 2B10                                   | 1.32 | 0.0019 |
| P24472     | Gsta4; Glutathione S-transferase A4                            | 1.28 | 0.0019 |
| F6T2Z7     | Cald1; Caldesmon 1 (Fragment)                                  | 0.80 | 0.0162 |
| Q9DCT8     | Crip2; Cysteine-rich protein 2                                 | 0.83 | 0.0023 |
| B7ZWN4     | Sult6b2; Sulfotransferase                                      | 1.42 | 0.0232 |
| Q58E35     | Rplp1; MCG10168                                                | 0.83 | 0.0021 |
| P11352     | Gpx1; Glutathione peroxidase 1                                 | 1.36 | 0.0000 |
| Q8CGP5     | Hist1h2af; Histone H2A type 1-F                                | 0.76 | 0.0322 |
| A0A0F7QZE4 | HC; MAb 110 heavy chain                                        | 1.23 | 0.0037 |
| D3YX03     | Gm7849; Uncharacterized protein                                | 0.79 | 0.0273 |
| Q5ERJ0     | Gm14851; CRS1C-2                                               | 0.69 | 0.0048 |
| K3W4L7     | Pbld1; Phenazine biosynthesis-like domain-containing protein 2 | 1.38 | 0.0019 |
| Q9D8L4     | N/A; Uncharacterized protein                                   | 1.25 | 0.0002 |
| P29477     | Nos2; Nitric oxide synthase, inducible                         | 1.22 | 0.0180 |
| P47915     | Rpl29; 60S ribosomal protein L29                               | 0.81 | 0.0026 |
| W0UUX7     | Ang4; Ribonuclease A a4                                        | 0.68 | 0.0014 |
| Q8C1N8     | Defa22; Alpha-defensin 22                                      | 0.59 | 0.0107 |
| A0A075B5K2 | Igkv9-124; Immunoglobulin kappa chain variable 9-124           | 1.23 | 0.0342 |
| P28310     | Defa3; Alpha-defensin 3                                        | 0.75 | 0.0037 |
| Q3UEN8     | Cyp3a11; MCG15287                                              | 1.37 | 0.0034 |
| Q9D848     | AY761184; CDNA sequence AY761184                               | 0.81 | 0.0070 |

|            |                                                                           |      |        |
|------------|---------------------------------------------------------------------------|------|--------|
| Q5G866     | Defa23; Alpha-defensin 23                                                 | 0.81 | 0.0300 |
| Q45VN2     | Defa20; Alpha-defensin 20                                                 | 0.54 | 0.0272 |
| B3VKY5     | AY761184; CRS1C-6 (Fragment)                                              | 0.64 | 0.0491 |
| A0A075B5R5 | Ighv4-1; Immunoglobulin heavy variable 4-1 (Fragment)                     | 0.78 | 0.0134 |
| Q9D958     | Spcs1; Signal peptidase complex subunit 1                                 | 0.83 | 0.0185 |
| E9QPZ2     | Defa30; Defensin, alpha, 30                                               | 0.69 | 0.0412 |
| Q5DTK3     | Prkci; Protein kinase C iota                                              | 1.22 | 0.0383 |
| Q8BGX2     | Timm29; Mitochondrial import inner membrane translocase subunit Tim29     | 1.24 | 0.0117 |
| Q64374     | Rgn; Regucalcin                                                           | 1.26 | 0.0002 |
| P03987     | N/A; Ig gamma-3 chain C region                                            | 1.21 | 0.0013 |
| Q545M7     | Pvalb; Parvalbumin, isoform CRA_a                                         | 1.40 | 0.0145 |
| A0A0G2JFE9 | Ighv1-76; Immunoglobulin heavy variable 1-76 (Fragment)                   | 1.43 | 0.0347 |
| I6L998     | N/A; Uncharacterized protein                                              | 1.60 | 0.0230 |
| Q3UMW7     | Mapkapk3; MAP kinase-activated protein kinase 3                           | 1.21 | 0.0003 |
| Q9BCZ4     | Selenos; Selenoprotein S                                                  | 1.21 | 0.0058 |
| A2RSF1     | Commd1; COMM domain containing 1                                          | 1.23 | 0.0142 |
| Q9D1C1     | Ube2c; Ubiquitin-conjugating enzyme E2 C                                  | 1.24 | 0.0037 |
| Q3UM95     | Vipas39; Putative uncharacterized protein                                 | 1.27 | 0.0309 |
| E9Q238     | Kank1; KN motif and ankyrin repeat domains 1                              | 1.33 | 0.0362 |
| A2N1N1     | N/A; B cell antigen receptor                                              | 1.42 | 0.0402 |
| A4GE64     | Ctnna3; Alpha-T-catenin                                                   | 1.30 | 0.0392 |
| P18531     | Ighv3-6; Ig heavy chain V region 3-6                                      | 0.56 | 0.0051 |
| Q9ESM6     | Gdpd2; Glycerophosphoinositol inositolphosphodiesterase GDPD2             | 1.22 | 0.0238 |
| A0A140T8P6 | Igkv12-46; Immunoglobulin kappa variable 12-46 (Fragment)                 | 1.39 | 0.0074 |
| Q9CZU4     | Eral1; GTPase Era, mitochondrial                                          | 1.23 | 0.0214 |
| Q91XA9     | Chia; Acidic mammalian chitinase                                          | 1.27 | 0.0305 |
| Q91XB7     | Yif1a; Protein YIF1A                                                      | 1.21 | 0.0280 |
| J3QP43     | Stum; Protein stum homolog                                                | 1.27 | 0.0397 |
| Q99JI1     | Mustn1; Musculoskeletal embryonic nuclear protein 1                       | 1.34 | 0.0321 |
| A0A0A6YXZ4 | Ighv1-62-2; Immunoglobulin heavy variable 1-62-2 (Fragment)               | 1.40 | 0.0091 |
| Q3TWI2     | Sardh; Putative uncharacterized protein                                   | 1.25 | 0.0452 |
| Q9WV38     | Slc2a5; Solute carrier family 2, facilitated glucose transporter member 5 | 1.31 | 0.0030 |
| Q3UNJ7     | B3gnt3; Hexosyltransferase                                                | 1.25 | 0.0203 |
| Q91WC9     | Daglb; Sn1-specific diacylglycerol lipase beta                            | 1.26 | 0.0238 |
| O88697     | Stk16; Serine/threonine-protein kinase 16                                 | 1.23 | 0.0212 |
| Q91W52     | Tmem19; Transmembrane protein 19                                          | 1.21 | 0.0073 |

|            |                                                                          |      |        |
|------------|--------------------------------------------------------------------------|------|--------|
| P26150     | Hsd3b3; 3 beta-hydroxysteroid dehydrogenase/Delta 5-->4-isomerase type 3 | 1.23 | 0.0052 |
| X5J5N0     | N/A; IgM heavy chain VDJ region (Fragment)                               | 1.28 | 0.0442 |
| Q922F6     | N/A; Putative uncharacterized protein (Fragment)                         | 2.16 | 0.0265 |
| Q9CQI9     | Med30; Mediator of RNA polymerase II transcription subunit 30            | 1.41 | 0.0494 |
| A0A0A6YXB7 | Ssr2; Translocon-associated protein subunit beta                         | 0.83 | 0.0163 |
| Q9D8H7     | Oma1; Metalloendopeptidase OMA1, mitochondrial                           | 1.23 | 0.0234 |
| Q91VA1     | Slc44a4; Choline transporter-like protein 4                              | 1.21 | 0.0472 |
| Q3V2X3     | Il1rap; Putative uncharacterized protein                                 | 1.25 | 0.0007 |
| Q3TV21     | Fxn; Frataxin                                                            | 1.41 | 0.0044 |
| F8VQ45     | Tmc4; Transmembrane channel-like protein                                 | 1.24 | 0.0454 |
| Q9R0A1     | Clcn2; Chloride channel protein 2                                        | 1.22 | 0.0357 |
| B2RSR2     | Sec22a; SEC22 vesicle trafficking protein homologue A (S. cerevisiae)    | 1.25 | 0.0481 |
| A2A6P4     | Fam104a; Family with sequence similarity 104, member A                   | 0.82 | 0.0208 |
| B1ASK8     | Ube2j2; Ubiquitin-conjugating enzyme E2 J2                               | 1.21 | 0.0476 |
| Q9WU62     | Incenp; Inner centromere protein                                         | 1.28 | 0.0009 |
| Q9QXS8     | Cml5; Probable N-acetyltransferase CML5                                  | 1.22 | 0.0376 |
| G5E8C6     | Vill; Villin-like protein                                                | 1.73 | 0.0027 |
| L7N231     | Gm15292; Uncharacterized protein                                         | 0.77 | 0.0155 |
| Q8VCQ3     | Nrbf2; Nuclear receptor-binding factor 2                                 | 0.58 | 0.0283 |
| Q148Z6     | Gpr107; Expressed sequence AI790205                                      | 1.23 | 0.0317 |
| A0A0C6E3V3 | HC;HC protein                                                            | 1.21 | 0.0301 |
| Q63ZW6     | Col4a5; Col4a5 protein                                                   | 0.75 | 0.0211 |

<sup>a</sup>The accession ID of each protein in the Uniprot database. <sup>b</sup>The gene name and protein description of each protein in the Uniprot database. <sup>c</sup>The fold change value of each differentially expressed protein in the Se-D/0.15-SeM comparison. <sup>d</sup>Differences in protein abundances between the Se-D and 0.15-SeM groups were analyzed using one-way analysis of variance, followed by the Tukey's post hoc test.  $P < 0.05$  was considered as significant. The value 0 indicates  $P < 0.0001$ .

**Table S11 Differentially expressed proteins in the 0.40-SeM/0.15-SeM comparison**

| Accession <sup>a</sup> | Description <sup>b</sup>                    | FC <sup>c</sup> | P value <sup>d</sup> |
|------------------------|---------------------------------------------|-----------------|----------------------|
| Q8BTM8                 | Flna; Filamin-A                             | 0.81            | 0.0078               |
| Q6URW6                 | Myh14; Myosin-14                            | 1.20            | 0.0205               |
| F8VQM5                 | Sis; Sucrase isomaltase (alpha-glucosidase) | 1.29            | 0.0408               |

|            |                                                                       |      |        |
|------------|-----------------------------------------------------------------------|------|--------|
| O08601     | Mttp; Microsomal triglyceride transfer protein large subunit          | 1.37 | 0.0083 |
| P62737     | Acta2; Actin, aortic smooth muscle                                    | 0.72 | 0.0201 |
| Q8VDN2     | Atp1a1; Sodium/potassium-transporting ATPase subunit alpha-1          | 1.24 | 0.0027 |
| Q64727     | Vcl; Vinculin                                                         | 0.82 | 0.0117 |
| Q62468     | Vill1; Villin-1                                                       | 1.30 | 0.0194 |
| Q3UQ44     | Iqgap2; Ras GTPase-activating-like protein IQGAP2                     | 1.20 | 0.0145 |
| B1B1A8     | Mylk; Myosin light chain kinase, smooth muscle                        | 0.83 | 0.0295 |
| O88329     | Myo1a; Unconventional myosin-Ia                                       | 1.20 | 0.0357 |
| Q3V0K9     | Pls1; Plastin-1                                                       | 1.33 | 0.0219 |
| P31001     | Des; Desmin                                                           | 0.79 | 0.0134 |
| O88428     | Papss2; Bifunctional 3'-phosphoadenosine 5'-phosphosulfate synthase 2 | 1.45 | 0.0172 |
| Q91Y97     | Aldob; Fructose-bisphosphate aldolase B                               | 1.37 | 0.0018 |
| Q3TAN0     | Cdh17; Putative uncharacterized protein                               | 1.23 | 0.0202 |
| P14824     | Anxa6; Annexin A6                                                     | 0.81 | 0.0120 |
| Q8VC30     | Tkfc; Triokinase/FMN cyclase                                          | 1.33 | 0.0029 |
| P20152     | Vim; Vimentin                                                         | 0.78 | 0.0044 |
| Q64521     | Gpd2; Glycerol-3-phosphate dehydrogenase, mitochondrial               | 1.21 | 0.0021 |
| P48678     | Lmna; Prelamin-A/C                                                    | 0.83 | 0.0042 |
| Q3UQ71     | Ephx2; Putative uncharacterized protein                               | 1.33 | 0.0052 |
| P08249     | Mdh2; Malate dehydrogenase, mitochondrial                             | 1.22 | 0.0041 |
| Q3UKS0     | Acs15; Putative uncharacterized protein                               | 1.41 | 0.0033 |
| Q9D312     | Krt20; Keratin, type I cytoskeletal 20                                | 1.32 | 0.0294 |
| Q91W97     | Hkdc1; Putative hexokinase HKDC1                                      | 1.24 | 0.0079 |
| G3X925     | Pklr; Pyruvate kinase                                                 | 1.27 | 0.0098 |
| B2RSN3     | Tubb2b; Tubulin beta chain                                            | 0.83 | 0.0038 |
| Q8BH64     | Ehd2; EH domain-containing protein 2                                  | 0.79 | 0.0079 |
| Q8BK48     | Ces2e; Pyrethroid hydrolase Ces2e                                     | 1.33 | 0.0043 |
| Q545N7     | Ckmt1; Creatine kinase, mitochondrial 1, ubiquitous, isoform CRA_a    | 1.32 | 0.0086 |
| P13707     | Gpd1; Glycerol-3-phosphate dehydrogenase [NAD(+)], cytoplasmic        | 1.27 | 0.0023 |
| A0A1B0GRV0 | Bpnt1; 3'(2'),5'-bisphosphate nucleotidase 1                          | 1.22 | 0.0003 |
| Q69ZN0     | Gda; MKIAA1258 protein (Fragment)                                     | 1.28 | 0.0110 |
| Q6ZQM8     | Ugt1a7c; UDP-glucuronosyltransferase 1-7C                             | 1.26 | 0.0006 |

|            |                                                                 |      |        |
|------------|-----------------------------------------------------------------|------|--------|
| E9Q5Z6     | Adh6a; Alcohol dehydrogenase 6A (class V)                       | 1.45 | 0.0006 |
| Q9DBM2     | Ehhadh; Peroxisomal bifunctional enzyme                         | 1.21 | 0.0016 |
| P82198     | Tgfbi; Transforming growth factor-beta-induced protein ig-h3    | 0.76 | 0.0056 |
| P48036     | Anxa5; Annexin A5                                               | 0.79 | 0.0155 |
| Q9QWG7     | Sult1b1; Sulfotransferase family cytosolic 1B member 1          | 1.29 | 0.0149 |
| Q9JMH6     | Txnrd1; Thioredoxin reductase 1, cytoplasmic                    | 1.23 | 0.0000 |
| P37804     | Tagln; Transgelin                                               | 0.75 | 0.0060 |
| E9QA16     | Cald1; Caldesmon 1                                              | 0.79 | 0.0084 |
| P12710     | Fabp1; Fatty acid-binding protein, liver                        | 1.37 | 0.0147 |
| Q8BZF8     | Pgm5; Phosphoglucomutase-like protein 5                         | 0.79 | 0.0115 |
| P14094     | Atp1b1; Sodium/potassium-transporting ATPase subunit beta-1     | 1.30 | 0.0024 |
| Q4FJX4     | Csrp1; Csrp1 protein                                            | 0.74 | 0.0038 |
| Q61391     | Mme; Neprilysin                                                 | 1.25 | 0.0137 |
| A2AEX6     | Fhl1; Four and a half LIM domains protein 1                     | 0.79 | 0.0031 |
| Q91WG0     | Ces2c; Acylcarnitine hydrolase                                  | 1.34 | 0.0043 |
| Q9CQ19     | Myl9; Myosin regulatory light polypeptide 9                     | 0.81 | 0.0071 |
| Q64464     | Cyp3a13; Cytochrome P450 3A13                                   | 1.43 | 0.0003 |
| A0A0J9YU79 | Khk; Ketohexokinase                                             | 1.21 | 0.0065 |
| P19324     | Serpinh1; Serpin H1                                             | 0.83 | 0.0148 |
| P32020     | Scp2; Non-specific lipid-transfer protein                       | 1.24 | 0.0492 |
| Q922Q1     | Marc2; Mitochondrial amidoxime reducing component 2             | 1.23 | 0.0001 |
| F8VPQ6     | Alpi; Alkaline phosphatase                                      | 1.36 | 0.0085 |
| E9Q1Q9     | Khk; Ketohexokinase                                             | 1.30 | 0.0014 |
| Q08091     | Cnn1; Calponin-1                                                | 0.78 | 0.0045 |
| Q63886     | Ugt1a1; UDP-glucuronosyltransferase 1-1                         | 1.22 | 0.0209 |
| Q91WU0     | Ces1f; Carboxylesterase 1F                                      | 1.26 | 0.0086 |
| Q9QXD6     | Fbp1; Fructose-1,6-bisphosphatase 1                             | 1.28 | 0.0064 |
| Q8BXX9     | Clic5; Chloride intracellular channel protein 5                 | 1.23 | 0.0178 |
| Q148B1     | Cyp2c65; Cytochrome P450, family 2, subfamily c, polypeptide 65 | 1.23 | 0.0119 |
| B9EK97     | Itn1; Itln1 protein                                             | 0.68 | 0.0037 |
| Q61425     | Hadh; Hydroxyacyl-coenzyme A dehydrogenase, mitochondrial       | 1.27 | 0.0053 |
| Q8QZR5     | Gpt; Alanine aminotransferase 1                                 | 1.30 | 0.0074 |

|            |                                                                               |      |        |
|------------|-------------------------------------------------------------------------------|------|--------|
| Q059R7     | Rbp2; Retinol binding protein 2, cellular                                     | 1.42 | 0.0002 |
| O54724     | Cavin1; Polymerase I and transcript release factor                            | 0.78 | 0.0042 |
| A0A0R4IZY2 | Cyp2d26; Cytochrome P450 2D26                                                 | 1.30 | 0.0021 |
| Q62009     | Postn; Periostin                                                              | 0.80 | 0.0224 |
| P70441     | Slc9a3r1; Na(+)/H(+) exchange regulatory cofactor NHE-RF1                     | 1.31 | 0.0398 |
| P28653     | Bgn; Biglycan                                                                 | 0.83 | 0.0092 |
| O08691     | Arg2; Arginase-2, mitochondrial                                               | 1.32 | 0.0002 |
| Q3UKA4     | Adh1; Alcohol dehydrogenase 1 (Class I), isoform CRA_c                        | 1.34 | 0.0042 |
| Q3UKR1     | Dcn; Decorin                                                                  | 0.73 | 0.0156 |
| P51885     | Lum; Lumican                                                                  | 0.74 | 0.0094 |
| Q3TJD7     | Pdlim7; PDZ and LIM domain protein 7                                          | 0.80 | 0.0116 |
| O55222     | Ilk; Integrin-linked protein kinase                                           | 0.79 | 0.0113 |
| Q99L04     | Dhrs1; Dehydrogenase/reductase SDR family member 1                            | 1.27 | 0.0002 |
| Q3UZZ6     | Sult1d1; Sulfotransferase 1 family member D1                                  | 1.23 | 0.0181 |
| O88451     | Rdh7; Retinol dehydrogenase 7                                                 | 1.23 | 0.0014 |
| Q8K154     | Ugt2b34; UDP-glucuronosyltransferase                                          | 1.22 | 0.0088 |
| Q3U687     | Ifit1b12; Interferon-induced protein with tetratricopeptide repeats 1B-like 2 | 1.29 | 0.0198 |
| Q9EPC1     | Parva; Alpha-parvin                                                           | 0.80 | 0.0074 |
| P13745     | Gsta1; Glutathione S-transferase A1                                           | 1.34 | 0.0239 |
| Q8CCA7     | Slc5a1; Putative uncharacterized protein                                      | 1.42 | 0.0252 |
| Q3V0B5     | Lmod1; Putative uncharacterized protein                                       | 0.83 | 0.0075 |
| A6H6K1     | Aspn; Aspn protein                                                            | 0.76 | 0.0052 |
| P16045     | Lgals1; Galectin-1                                                            | 0.78 | 0.0049 |
| Q8BWQ1     | Ugt2a3; UDP-glucuronosyltransferase 2A3                                       | 1.21 | 0.0143 |
| D3YYJ7     | Mptx2; Pentaxin                                                               | 0.70 | 0.0002 |
| Q543S0     | Prelp; Proline arginine-rich end leucine-rich repeat                          | 0.80 | 0.0130 |
| Q63918     | Cavin2; Serum deprivation-response protein                                    | 0.79 | 0.0067 |
| Q6DYE8     | Enpp3; Ectonucleotide pyrophosphatase/phosphodiesterase family member 3       | 1.24 | 0.0192 |
| Q99PG0     | Aadac; Arylacetamide deacetylase                                              | 1.29 | 0.0005 |
| O08738     | Casp6; Caspase-6                                                              | 1.23 | 0.0015 |
| Q8R1Q7     | Arg2; Arginase                                                                | 1.21 | 0.0213 |



|            |                                                                              |      |        |
|------------|------------------------------------------------------------------------------|------|--------|
| Q9JLT2     | Treh; Trehalase                                                              | 1.23 | 0.0109 |
| Q3U0N0     | Gzma; Putative uncharacterized protein                                       | 1.28 | 0.0214 |
| Q62000     | Ogn; Mimecan                                                                 | 0.75 | 0.0139 |
| P17897     | Lyz1; Lysozyme C-1                                                           | 0.63 | 0.0027 |
| P56389     | Cda; Cytidine deaminase                                                      | 1.23 | 0.0079 |
| P49817     | Cav1; Caveolin-1                                                             | 0.79 | 0.0088 |
| A0A0R4J111 | Gpx2; Glutathione peroxidase                                                 | 1.29 | 0.0008 |
| Q9WUD0     | Cyp2b10; Cytochrome P450 2B10                                                | 1.29 | 0.0050 |
| Q9R092     | Hsd17b6; 17-beta-hydroxysteroid dehydrogenase type 6                         | 1.20 | 0.0089 |
| Q3TQC7     | Entpd5; Ectonucleoside triphosphate diphosphohydrolase 5                     | 1.22 | 0.0353 |
| P11087     | Col1a1; Collagen alpha-1(I) chain                                            | 0.77 | 0.0110 |
| Q9CRB6     | Tppp3; Tubulin polymerization-promoting protein family member 3              | 0.81 | 0.0074 |
| P24472     | Gsta4; Glutathione S-transferase A4                                          | 1.22 | 0.0440 |
| Q6YI28     | 2210407C18Rik; EP1                                                           | 1.25 | 0.0060 |
| F6T2Z7     | Cald1; Caldesmon 1 (Fragment)                                                | 0.76 | 0.0067 |
| Q9DCT8     | Crip2; Cysteine-rich protein 2                                               | 0.81 | 0.0116 |
| Q3U5N2     | Ifit1; Putative uncharacterized protein                                      | 1.37 | 0.0310 |
| Q3TU64     | Col1a2; Putative uncharacterized protein                                     | 0.79 | 0.0085 |
| Q8VBX5     | Ppt1; Palmitoyl-protein thioesterase                                         | 0.81 | 0.0006 |
| P97354     | St3gal4; Gal beta 1,4(3) GlcNAc alpha 2,3-sialyltransferase                  | 1.25 | 0.0046 |
| Q8VC49     | Ifi2712b; Interferon alpha-inducible protein 27-like protein 2B              | 1.35 | 0.0040 |
| Q8C0N2     | Gpat3; Glycerol-3-phosphate acyltransferase 3                                | 1.21 | 0.0159 |
| Q99LP6     | Grpel1; GrpE protein homolog 1, mitochondrial                                | 1.27 | 0.0068 |
| P11352     | Gpx1; Glutathione peroxidase 1                                               | 1.54 | 0.0000 |
| Q8CFJ7     | Slc25a45; Solute carrier family 25 member 45                                 | 1.24 | 0.0007 |
| F7A8H6     | Glutathione peroxidase                                                       | 1.32 | 0.0000 |
| Q3UZK0     | Lpgat1; Putative uncharacterized protein (Fragment)                          | 1.22 | 0.0019 |
| P70677     | Casp3; Caspase-3                                                             | 1.24 | 0.0005 |
| D3Z6F0     | Ifit1b1; Interferon-induced protein with tetratricopeptide repeats 1B-like 1 | 1.37 | 0.0267 |
| Q8CIW6     | Slc26a6; Solute carrier family 26 member 6                                   | 1.21 | 0.0256 |
| D3YX03     | Gm7849; Uncharacterized protein                                              | 0.70 | 0.0029 |
| Q5ERJ0     | Gm14851; CRS1C-2                                                             | 0.65 | 0.0019 |

|            |                                                                                              |      |        |
|------------|----------------------------------------------------------------------------------------------|------|--------|
| G3X939     | Slc9a3; Sodium/hydrogen exchanger 3                                                          | 1.23 | 0.0033 |
| Q80W94     | Mogat2; 2-acylglycerol O-acyltransferase 2                                                   | 1.32 | 0.0047 |
| P40240     | Cd9; CD9 antigen                                                                             | 0.80 | 0.0194 |
| A0A1L1SUM8 | St3gal4; CMP-N-acetylneuraminate-beta-galactosamide-alpha-2,3-sialyltransferase 4 (Fragment) | 1.45 | 0.0027 |
| Q9QZZ6     | Dpt; Dermatopontin                                                                           | 0.77 | 0.0225 |
| W0UUX7     | Ang4; Ribonuclease A a4                                                                      | 0.65 | 0.0008 |
| Q8C1N8     | Defa22; Alpha-defensin 22                                                                    | 0.50 | 0.0019 |
| Q78JN3     | Eci3; Enoyl-CoA delta isomerase 3, peroxisomal                                               | 1.31 | 0.0087 |
| Q3UEN8     | Cyp3a11; MCG15287                                                                            | 1.25 | 0.0068 |
| Q9D848     | AY761184; CDNA sequence AY761184                                                             | 0.72 | 0.0007 |
| P14246     | Slc2a2; Solute carrier family 2, facilitated glucose transporter member 2                    | 1.44 | 0.0040 |
| Q3UN27     | Mmp7; Matrilysin                                                                             | 0.82 | 0.0104 |
| Q8VI94     | Oas1; 2'-5'-oligoadenylate synthase-like protein 1                                           | 1.31 | 0.0084 |
| A2ARJ3     | Tmem236; Transmembrane protein 236                                                           | 1.26 | 0.0184 |
| Q5G866     | Defa23; Alpha-defensin 23                                                                    | 0.80 | 0.0312 |
| P61226     | Rap2b; Ras-related protein Rap-2b                                                            | 0.81 | 0.0180 |
| Q8C1E7     | Tmem120a; Transmembrane protein 120A                                                         | 1.21 | 0.0062 |
| Q3KNZ2     | Bco2; Beta-carotene 9', 10'-dioxygenase 2                                                    | 1.22 | 0.0041 |
| Q8K3K7     | Agpat2; 1-acyl-sn-glycerol-3-phosphate acyltransferase beta                                  | 1.21 | 0.0175 |
| Q9D115     | Mcee; Methylmalonyl-CoA epimerase, mitochondrial                                             | 1.23 | 0.0300 |
| Q45VN2     | Defa20; Alpha-defensin 20                                                                    | 0.42 | 0.0062 |
| B3VKY5     | AY761184; CRS1C-6                                                                            | 0.51 | 0.0128 |
| E9QM19     | Tm6sf2; Transmembrane 6 superfamily member 2                                                 | 1.25 | 0.0248 |
| A0A140LIU4 | Cox7a1; Cytochrome c oxidase subunit 7A1, mitochondrial                                      | 1.30 | 0.0117 |
| Q64522     | Hist2h2ab; Histone H2A type 2-B                                                              | 0.79 | 0.0068 |
| Q9DCZ1     | Gmpr; GMP reductase 1                                                                        | 0.83 | 0.0369 |
| P14069     | S100a6; Protein S100-A6                                                                      | 0.80 | 0.0363 |
| O09158     | Cyp3a25; Cytochrome P450 3A25                                                                | 1.31 | 0.0029 |
| Q5F218     | IgG1 TS1 VH; Gamma heavy chain variable region                                               | 1.58 | 0.0283 |
| P34928     | Apoc1; Apolipoprotein C-I                                                                    | 0.77 | 0.0033 |
| Q497J1     | Tmem86b; Lysoplasmalogenase                                                                  | 1.20 | 0.0137 |

|            |                                                                                        |      |        |
|------------|----------------------------------------------------------------------------------------|------|--------|
| Q5XK38     | Hmgn2; Hmgn2 protein                                                                   | 0.82 | 0.0281 |
| G5E897     | Kdelc2; KDEL (Lys-Asp-Glu-Leu) containing 2, isoform CRA_b                             | 0.79 | 0.0009 |
| A0A0R4J003 | Vip; VIP peptides                                                                      | 0.81 | 0.0490 |
| Q78HU7     | Gypc; Glycophorin-C                                                                    | 0.81 | 0.0182 |
| Q5DTG2     | Col3a1; MKIAA4231 protein (Fragment)                                                   | 0.77 | 0.0170 |
| P42337     | Pik3ca; Phosphatidylinositol 4,5-bisphosphate 3-kinase catalytic subunit alpha isoform | 0.82 | 0.0364 |
| Q80SZ7     | Gng5; Guanine nucleotide-binding protein G(I)/G(S)/G(O) subunit gamma-5                | 0.80 | 0.0081 |
| P35576     | G6pc; Glucose-6-phosphatase                                                            | 1.34 | 0.0296 |
| Q9WV38     | Slc2a5; Solute carrier family 2, facilitated glucose transporter member 5              | 1.22 | 0.0238 |
| Q8R0H4     | Lypd8; RIKEN cDNA 2210415F13, isoform CRA_a                                            | 1.24 | 0.0053 |
| Q9WVB0     | Rbpms; RNA-binding protein with multiple splicing                                      | 0.81 | 0.0083 |
| B1AWB9     | Col5a1; Collagen, type V, alpha 1                                                      | 0.83 | 0.0271 |
| Q545V6     | Sst; Putative uncharacterized protein                                                  | 0.73 | 0.0101 |
| Q3TBR1     | Gskip; Putative uncharacterized protein                                                | 1.20 | 0.0004 |
| Q9JHH9     | Copz2; Coatamer subunit zeta-2                                                         | 0.79 | 0.0047 |
| Q62277     | Syp; Synaptophysin                                                                     | 0.79 | 0.0357 |
| P20491     | Fcer1g; High affinity immunoglobulin epsilon receptor subunit gamma                    | 0.78 | 0.0171 |
| Q3UPR9     | Sbson; Somatomedin-B and thrombospondin type-1 domain-containing protein               | 0.78 | 0.0460 |
| Q8BTJ4     | Enpp4; Bis(5'-adenosyl)-triphosphatase enpp4                                           | 0.82 | 0.0385 |
| A0A0R4J097 | Tgfr3; Transforming growth factor beta receptor type 3                                 | 0.77 | 0.0197 |
| A0A1B0GRV7 | Gm17949; Uncharacterized protein                                                       | 1.22 | 0.0317 |
| P0DN89     | Tmem254a; Transmembrane protein 254                                                    | 0.82 | 0.0416 |
| O70303     | Cideb; Cell death activator CIDE-B                                                     | 1.21 | 0.0032 |
| Q3UU11     | Fkbp7; Peptidylprolyl isomerase                                                        | 0.80 | 0.0143 |
| Q99MV1     | Tdrd1; Tudor domain-containing protein 1                                               | 0.79 | 0.0453 |
| Q8R115     | Tmem82; Transmembrane protein 82                                                       | 1.30 | 0.0063 |
| Q3UTR7     | Agt; Angiotensinogen                                                                   | 0.80 | 0.0124 |
| F7C0E4     | Atxn7l1; Ataxin-7-like protein 1                                                       | 1.74 | 0.0170 |
| L7N231     | Gm15292; Uncharacterized protein                                                       | 0.71 | 0.0034 |
| Q9Z2D1     | Mtmr2; Myotubularin-related protein 2                                                  | 0.79 | 0.0406 |

|        |                                                    |      |        |
|--------|----------------------------------------------------|------|--------|
| Q8VCQ3 | Nrbf2; Nuclear receptor-binding factor 2           | 0.44 | 0.0163 |
| Q14BV7 | Acbd6; Acyl-Coenzyme A binding domain containing 6 | 0.74 | 0.0080 |
| Q7TQA6 | Tas2r38; Taste receptor type 2 member 38           | 0.76 | 0.0461 |

<sup>a</sup>The accession ID of each protein in the Uniprot database. <sup>b</sup>The gene name and protein description of each protein in the Uniprot database. <sup>c</sup>The fold change value of each differentially expressed protein in the 0.40-SeM/0.15-SeM comparison. <sup>d</sup>Differences in protein abundances between the 0.40-SeM and 0.15-SeM groups were analyzed using one-way analysis of variance, followed by the Tukey's post hoc test.  $P < 0.05$  was considered as significant. The value 0 indicates  $P < 0.0001$ .

**Table S12 Differentially expressed proteins in the 0.15-SeM/0.15-SeL comparison**

| Accession <sup>a</sup> | Description <sup>b</sup>                                  | FC <sup>c</sup> | P value <sup>d</sup> |
|------------------------|-----------------------------------------------------------|-----------------|----------------------|
| A0A075B5Y4             | Ighv1-81; Immunoglobulin heavy variable 1-81 (Fragment)   | 0.74            | 0.0020               |
| A0A075B6A0             | Ighm; Ig mu chain C region (Fragment)                     | 0.83            | 0.0142               |
| A0A087WPM0             | Selenoh; Selenoprotein H                                  | 0.76            | 0.0213               |
| A0A087WS16             | Col6a3; Collagen, type VI, alpha 3                        | 1.31            | 0.0340               |
| A0A0A6YWH6             | Ighv9-4; Immunoglobulin heavy variable 9-4 (Fragment)     | 0.67            | 0.0042               |
| A0A0A6YXB7             | Ssr2; Translocon-associated protein subunit beta          | 1.28            | 0.0073               |
| A0A0C6E3V3             | HC; HC protein                                            | 0.80            | 0.0262               |
| A0A0G2JG52             | Crybg1; Absent in melanoma 1                              | 0.82            | 0.0088               |
| A0A0J9YU79             | Khk; Ketoheokinase                                        | 0.82            | 0.0138               |
| A0A0R4J111             | Gpx2; Glutathione peroxidase                              | 0.76            | 0.0004               |
| A0A0R4J119             | Cyfip1; Cytoplasmic FMR1-interacting protein 1            | 0.80            | 0.0021               |
| A0A0R4J138             | Arsb; Arylsulfatase B                                     | 0.78            | 0.0067               |
| A0A0R4J203             | Dao; D-amino-acid oxidase                                 | 0.79            | 0.0091               |
| A0A140LHQ9             | Synm; Synemin                                             | 0.82            | 0.0023               |
| A0A140T8P6             | Igkv12-46; Immunoglobulin kappa variable 12-46 (Fragment) | 0.83            | 0.0465               |
| A0A1E1GJG6             | Wgn-scFv; Single-chain variable                           | 0.75            | 0.0182               |
| A0JLQ7                 | Pcid2; Pcid2 protein (Fragment)                           | 0.79            | 0.0336               |
| A2AEX6                 | Fhl1; Four and a half LIM domains protein 1               | 1.21            | 0.0175               |
| A2ARJ3                 | Tmem236; Transmembrane protein 236                        | 0.81            | 0.0233               |
| A2N1N1                 | N/A; B cell antigen receptor                              | 0.62            | 0.0161               |
| A6H6K1                 | Aspn; Aspn protein                                        | 1.23            | 0.0293               |
| A8CA96                 | Tcea3; Tissue-specific transcription factor S-II          | 0.77            | 0.0035               |
| B1Q450                 | HBB1; Hemoglobin beta chain subunit                       | 0.83            | 0.0452               |
| B2RTP7                 | Krt2; Krt2 protein                                        | 0.81            | 0.0092               |
| B3VKY5                 | AY761184; CRS1C-6 (Fragment)                              | 1.72            | 0.0310               |
| B7ZWN4                 | Sult6b2; Sulfotransferase                                 | 0.67            | 0.0061               |
| B9EK97                 | Itln1; Itln1 protein                                      | 1.35            | 0.0272               |
| D3YX03                 | Gm7849; Q5ERJ0                                            | 1.31            | 0.0266               |

|        |                                                                               |      |        |
|--------|-------------------------------------------------------------------------------|------|--------|
| D3YYJ7 | Mptx2; Pentaxin                                                               | 1.46 | 0.0002 |
| E0CX47 | Nxpe5; Neurexophilin and PC-esterase domain family, member 5                  | 0.68 | 0.0055 |
| E9PVZ9 | Eif4e1b; Eukaryotic translation initiation factor 4E type 1B                  | 0.75 | 0.0149 |
| E9PWN0 | Lpin2; Phosphatidate phosphatase LPIN2                                        | 0.73 | 0.0260 |
| E9Q0F0 | Krt78; Keratin 78                                                             | 0.78 | 0.0123 |
| E9Q1Q9 | Khk; Ketoheokinase                                                            | 0.81 | 0.0134 |
| E9Q5Z6 | Adh6a; Alcohol dehydrogenase 6A (class V)                                     | 0.73 | 0.0083 |
| F6T2Z7 | Cald1; Caldesmon 1 (Fragment)                                                 | 1.28 | 0.0222 |
| F7A8H6 | Glutathione peroxidase                                                        | 0.75 | 0.0000 |
| F8VPQ6 | Alpi; Alkaline phosphatase                                                    | 0.70 | 0.0273 |
| F8VQ45 | Tmc4; Transmembrane channel-like protein                                      | 0.80 | 0.0206 |
| G3X939 | Slc9a3; Sodium/hydrogen exchanger 3                                           | 0.82 | 0.0145 |
| G3X9Y6 | Akr1c19; Aldo-keto reductase family 1, member C19                             | 0.83 | 0.0002 |
| J3QNH8 | Gm7694; Uncharacterized protein                                               | 0.79 | 0.0484 |
| K3W4L7 | Pbld1; Phenazine biosynthesis-like domain-containing protein 2                | 0.75 | 0.0027 |
| L7N231 | Gm15292; Uncharacterized protein                                              | 1.34 | 0.0245 |
| O08691 | Arg2; Arginase-2, mitochondrial                                               | 0.78 | 0.0031 |
| O09158 | Cyp3a25; Cytochrome P450 3A25                                                 | 0.81 | 0.0489 |
| O35242 | Nsmaf; Protein FAN                                                            | 0.81 | 0.0121 |
| O54724 | Cavin1; Polymerase I and transcript release factor                            | 1.22 | 0.0459 |
| O54750 | Cyp2j6; Cytochrome P450 2J6                                                   | 0.83 | 0.0068 |
| O54788 | Dffb; DNA fragmentation factor subunit beta                                   | 0.76 | 0.0006 |
| O54909 | Rdh16; Cis-retinol androgen dehydrogenase 1                                   | 0.81 | 0.0297 |
| O88428 | Papss2; Bifunctional 3'-phosphoadenosine 5'-phosphosulfate synthase 2         | 0.63 | 0.0223 |
| O88451 | Rdh7; Retinol dehydrogenase 7                                                 | 0.82 | 0.0376 |
| O88665 | Brd7; Bromodomain-containing protein 7                                        | 0.82 | 0.0162 |
| O89109 | Kcnn4; Intermediate conductance calcium-activated potassium channel protein 4 | 0.80 | 0.0349 |
| P04104 | Krt1; Keratin, type II cytoskeletal 1                                         | 0.74 | 0.0162 |
| P08882 | Gzmc; Granzyme C                                                              | 0.80 | 0.0331 |
| P09528 | Fth1; Ferritin heavy chain                                                    | 0.80 | 0.0312 |
| P11352 | Gpx1; Glutathione peroxidase 1                                                | 0.55 | 0.0000 |
| P13745 | Gsta1; Glutathione S-transferase A1                                           | 0.73 | 0.0008 |
| P16045 | Lgals1; Galectin-1                                                            | 1.22 | 0.0300 |
| P17897 | Lyz1; Lysozyme C-1                                                            | 1.46 | 0.0128 |
| P18531 | Ighv3-6; Ig heavy chain V region 3-6                                          | 1.68 | 0.0067 |
| P21956 | Mfge8; Lactadherin                                                            | 0.79 | 0.0019 |
| P24472 | Gsta4; Glutathione S-transferase A4                                           | 0.76 | 0.0015 |

|        |                                                                                                             |      |        |
|--------|-------------------------------------------------------------------------------------------------------------|------|--------|
| P28310 | Defa3; Alpha-defensin 3                                                                                     | 2.25 | 0.0014 |
| P32507 | Nectin2; Nectin-2                                                                                           | 0.82 | 0.0225 |
| P37804 | Tagln; Transgelin                                                                                           | 1.28 | 0.0350 |
| P49135 | Ercc3; TFIIH basal transcription factor complex helicase XPB subunit                                        | 0.83 | 0.0500 |
| P49817 | Cav1; Caveolin-1                                                                                            | 1.24 | 0.0332 |
| P59108 | Cpne2; Copine-2                                                                                             | 0.81 | 0.0267 |
| P62342 | Selenot; Selenoprotein T                                                                                    | 0.83 | 0.0001 |
| P82198 | Tgfb1; Transforming growth factor-beta-induced protein ig-h3                                                | 1.24 | 0.0214 |
| P97364 | Seps2; Selenide, water dikinase 2                                                                           | 0.82 | 0.0000 |
| P97816 | S100g; Protein S100-G                                                                                       | 0.70 | 0.0289 |
| Q059R7 | Rbp2; Retinol binding protein 2, cellular                                                                   | 0.79 | 0.0272 |
| Q0VEE6 | Znf800; Zinc finger protein 800                                                                             | 0.80 | 0.0003 |
| Q32P04 | Krt5; Keratin 5                                                                                             | 0.69 | 0.0191 |
| Q3TBL6 | Tnfaip8l3; Tumor necrosis factor alpha-induced protein 8-like protein 3                                     | 0.73 | 0.0001 |
| Q3TCT4 | Entpd7; Ectonucleoside triphosphate diphosphohydrolase 7                                                    | 0.80 | 0.0084 |
| Q3TI65 | Mtfp1; Putative uncharacterized protein                                                                     | 0.83 | 0.0041 |
| Q3TIR3 | Ric8a; Synembryn-A                                                                                          | 0.82 | 0.0215 |
| Q3TV21 | Fxn; Frataxin                                                                                               | 0.78 | 0.0152 |
| Q3UBP6 | Actb; Putative uncharacterized protein                                                                      | 0.76 | 0.0010 |
| Q3UEN8 | Cyp3a11; MCG15287                                                                                           | 0.76 | 0.0034 |
| Q3UKA4 | Adh1; Alcohol dehydrogenase 1 (Class I), isoform CRA_c                                                      | 0.70 | 0.0000 |
| Q3UMW7 | Mapkapk3; MAP kinase-activated protein kinase 3                                                             | 0.80 | 0.0050 |
| Q3UN27 | Mmp7; Matrilysin                                                                                            | 1.21 | 0.0117 |
| Q3UP47 | Cfd; Complement factor D (Adipsin)                                                                          | 0.75 | 0.0004 |
| Q3UV17 | Krt76; Keratin, type II cytoskeletal 2 oral                                                                 | 0.78 | 0.0246 |
| Q3UYR3 | Cbfb; Putative uncharacterized protein (Fragment)                                                           | 0.79 | 0.0205 |
| Q3V009 | Tmed1; Transmembrane emp24 domain-containing protein 1                                                      | 0.82 | 0.0075 |
| Q45VN2 | Defa20; Alpha-defensin 20                                                                                   | 2.57 | 0.0052 |
| Q4FJX4 | Csrp1; Csrp1 protein                                                                                        | 1.28 | 0.0244 |
| Q545M7 | Pvalb; Parvalbumin, isoform CRA_a                                                                           | 0.78 | 0.0304 |
| Q545Y5 | Cd74; CD74 antigen (Invariant polypeptide of major histocompatibility complex, class II antigen-associated) | 1.22 | 0.0490 |
| Q5ERJ0 | Gm14851; CRS1C-2                                                                                            | 1.52 | 0.0043 |
| Q62245 | Sos1; Son of sevenless homolog 1                                                                            | 0.73 | 0.0385 |
| Q63ZW6 | Col4a5; Col4a5 protein                                                                                      | 1.42 | 0.0197 |
| Q64374 | Rgn; Regucalcin                                                                                             | 0.81 | 0.0005 |
| Q64435 | Col4a5; UDP-glucuronosyltransferase 1-6                                                                     | 0.79 | 0.0337 |

|        |                                                                         |      |        |
|--------|-------------------------------------------------------------------------|------|--------|
| Q64464 | Cyp3a13; Cytochrome P450 3A13                                           | 0.81 | 0.0396 |
| Q6QI06 | Rictor; Rapamycin-insensitive companion of mTOR                         | 0.82 | 0.0166 |
| Q8BGX2 | Timm29; Mitochondrial import inner membrane translocase subunit Tim29   | 0.82 | 0.0044 |
| Q8BLY2 | Tarsl2; Probable threonine--tRNA ligase 2, cytoplasmic                  | 0.82 | 0.0402 |
| Q8BS35 | Agmo; Alkylglycerol monooxygenase                                       | 0.82 | 0.0002 |
| Q8BTM8 | Flna; Filamin-A                                                         | 1.20 | 0.0413 |
| Q8BWQ1 | Ugt2a3; UDP-glucuronosyltransferase 2A3                                 | 0.81 | 0.0429 |
| Q8C1N8 | Defa22; Alpha-defensin 22                                               | 2.25 | 0.0014 |
| Q8CB77 | Eloa; Elongin-A                                                         | 0.82 | 0.0122 |
| Q8CFA1 | Irak2; Interleukin-1 receptor-associated kinase-like 2                  | 0.81 | 0.0280 |
| Q8CFJ7 | Slc25a45; Solute carrier family 25 member 45                            | 0.81 | 0.0081 |
| Q8K0J2 | B3gnt7; UDP-GlcNAc:betaGal beta-1,3-N-acetylglucosaminyltransferase 7   | 0.81 | 0.0146 |
| Q8K205 | Pop1; Processing of 1, ribonuclease P/MRP family, (S. cerevisiae)       | 0.77 | 0.0206 |
| Q8R1J5 | Fcgbp; Fcgbp protein (Fragment)                                         | 0.79 | 0.0485 |
| Q8R1K1 | Ubac2; Ubiquitin-associated domain-containing protein 2                 | 0.68 | 0.0479 |
| Q8R1N0 | Znf830; Zinc finger protein 830                                         | 0.81 | 0.0088 |
| Q8R1Q7 | Arg2; Arginase                                                          | 0.78 | 0.0173 |
| Q8R2H9 | Phospho1; Phosphoethanolamine/phosphocholine phosphatase                | 0.78 | 0.0232 |
| Q8R418 | Dicer1; Endoribonuclease Dicer                                          | 0.80 | 0.0083 |
| Q8R4U7 | Luzp1; Leucine zipper protein 1                                         | 0.78 | 0.0335 |
| Q8R5A6 | Tbc1d22a; TBC1 domain family member 22A                                 | 0.82 | 0.0148 |
| Q8VCY3 | Rdh16f2; cDNA sequence BC089597                                         | 0.77 | 0.0320 |
| Q8VED5 | Krt79; Keratin, type II cytoskeletal 79                                 | 0.71 | 0.0444 |
| Q8VHC3 | Selenom; Selenoprotein M                                                | 0.81 | 0.0077 |
| Q91VL8 | Terf2ip; Telomeric repeat-binding factor 2-interacting protein 1        | 0.80 | 0.0001 |
| Q91WG0 | Ces2c; Acylcarnitine hydrolase                                          | 0.80 | 0.0339 |
| Q91Y97 | Aldob; Fructose-bisphosphate aldolase B                                 | 0.78 | 0.0194 |
| Q91Z58 | N/A; Uncharacterized protein C6orf132 homolog                           | 0.74 | 0.0419 |
| Q91ZT5 | Fgd4; FYVE, RhoGEF and PH domain-containing protein 4                   | 0.81 | 0.0093 |
| Q99L15 | Acot1; Acot1 protein (Fragment)                                         | 0.83 | 0.0402 |
| Q99PG0 | Aadac; Arylacetamide deacetylase                                        | 0.78 | 0.0024 |
| Q9BCZ4 | Selenos; Selenoprotein S                                                | 0.81 | 0.0196 |
| Q9CQ19 | My19; Myosin regulatory light polypeptide 9                             | 1.21 | 0.0376 |
| Q9CYW4 | Hdhd3; Haloacid dehalogenase-like hydrolase domain-containing protein 3 | 0.80 | 0.0052 |
| Q9CZH7 | Mxra7; Matrix-remodeling-associated protein 7                           | 0.81 | 0.0059 |

|        |                                                                           |      |        |
|--------|---------------------------------------------------------------------------|------|--------|
| Q9CZU4 | Eral1; GTPase Era, mitochondrial                                          | 0.83 | 0.0018 |
| Q9D848 | AY761184; CDNA sequence AY761184                                          | 1.23 | 0.0082 |
| Q9D869 | Chp2; Calcineurin B homologous protein 2                                  | 0.82 | 0.0056 |
| Q9D8L4 | N/A; Uncharacterized protein                                              | 0.74 | 0.0066 |
| Q9D958 | Spcs1; Signal peptidase complex subunit 1                                 | 1.26 | 0.0262 |
| Q9DCT8 | Crip2; Cysteine-rich protein 2                                            | 1.23 | 0.0087 |
| Q9ESM6 | Gdpd2; Glycerophosphoinositol inositolphosphodiesterase GDPD2             | 0.78 | 0.0172 |
| Q9JHJ3 | Glmp; Glycosylated lysosomal membrane protein                             | 0.83 | 0.0141 |
| Q9JLI0 | Akr1c12; Aldo-keto reductase                                              | 0.82 | 0.0013 |
| Q9JMH6 | Txnrd1; Thioredoxin reductase 1, cytoplasmic                              | 0.79 | 0.0000 |
| Q9QX60 | Dguok; Deoxyguanosine kinase, mitochondrial                               | 0.81 | 0.0249 |
| Q9QXD6 | Fbp1; Fructose-1,6-bisphosphatase 1                                       | 0.82 | 0.0046 |
| Q9QY93 | Dctpp1; dCTP pyrophosphatase 1                                            | 0.80 | 0.0003 |
| Q9R092 | Hsd17b6; 17-beta-hydroxysteroid dehydrogenase type 6                      | 0.80 | 0.0185 |
| Q9WUD0 | Cyp2b10; Cytochrome P450 2B10                                             | 0.80 | 0.0305 |
| Q9WV38 | Slc2a5; Solute carrier family 2, facilitated glucose transporter member 5 | 0.72 | 0.0016 |
| W0UUX7 | Ang4; Ribonuclease A a4                                                   | 1.48 | 0.0018 |

<sup>a</sup>The accession ID of each protein in the Uniprot database. <sup>b</sup>The gene name and protein description of each protein in the Uniprot database. <sup>c</sup>The fold change value of each differentially expressed protein in the 0.15-SeM/0.15-SeL comparison. <sup>d</sup>Differences in protein abundances between the 0.15-SeM and 0.15-SeL groups were analyzed using one-way analysis of variance, followed by the Tukey's post hoc test.  $P < 0.05$  was considered as significant. The value 0 indicates  $P < 0.0001$ .

**Table S13 Differentially expressed proteins in the 0.40-SeM and 0.40-SeL comparison**

| Accession <sup>a</sup> | Description <sup>b</sup>                       | FC <sup>c</sup> | P value <sup>d</sup> |
|------------------------|------------------------------------------------|-----------------|----------------------|
| Q3UBP6                 | Actb; Putative uncharacterized protein         | 0.73            | 0.0002               |
| Q921I1                 | Tf; Serotransferrin                            | 1.21            | 0.0022               |
| Q3UQ71                 | Ephx2; Putative uncharacterized protein        | 1.26            | 0.0137               |
| Q3UKS0                 | Acs15; Putative uncharacterized protein        | 1.24            | 0.0206               |
| E9Q5Z6                 | Adh6a; Alcohol dehydrogenase 6A (class V)      | 1.22            | 0.0063               |
| P12710                 | Fabp1; Fatty acid-binding protein, liver       | 1.41            | 0.0050               |
| Q91WG0                 | Ces2c; Acylcarnitine hydrolase                 | 1.25            | 0.0011               |
| B1Q450                 | HBB1; Hemoglobin beta chain subunit            | 0.39            | 0.0016               |
| Q91WU0                 | Ces1f; Carboxylesterase 1F                     | 1.20            | 0.0279               |
| P19639                 | Gstm3; Glutathione S-transferase Mu 3          | 1.26            | 0.0054               |
| Q059R7                 | Rbp2; Retinol binding protein 2, cellular      | 1.35            | 0.0004               |
| Q8VCH0                 | Acaa1b; 3-ketoacyl-CoA thiolase B, peroxisomal | 1.27            | 0.0307               |
| A0A0R4IZY2             | Cyp2d26; Cytochrome P450 2D26                  | 1.23            | 0.0050               |



|            |                                                                           |      |        |
|------------|---------------------------------------------------------------------------|------|--------|
| P13745     | Gsta1; Glutathione S-transferase A1                                       | 1.31 | 0.0310 |
| Q8CGP0     | Hist3h2bb; Histone H2B type 3-B                                           | 0.71 | 0.0060 |
| O09049     | Reg3g; Regenerating islet-derived protein 3-gamma                         | 0.73 | 0.0031 |
| P04938     | Mup11; Major urinary protein 11                                           | 1.20 | 0.0074 |
| Q8VC49     | Ifi2712b; Interferon alpha-inducible protein 27-like protein 2B           | 1.20 | 0.0240 |
| Q64FW2     | Retsat; All-trans-retinol 13,14-reductase                                 | 1.25 | 0.0047 |
| Q8VHC3     | Selenom; Selenoprotein M                                                  | 0.80 | 0.0338 |
| Q5ERJ0     | Gm14851; CRS1C-2                                                          | 0.82 | 0.0204 |
| A0A075B5S2 | Ighv7-1; Uncharacterized protein (Fragment)                               | 0.53 | 0.0000 |
| Q9D848     | AY761184; CDNA sequence AY761184                                          | 0.82 | 0.0270 |
| Q08ED0     | Bcl2l15; Bcl-2-like protein 15                                            | 0.80 | 0.0150 |
| P14246     | Slc2a2; Solute carrier family 2, facilitated glucose transporter member 2 | 1.22 | 0.0405 |
| Q8VI94     | Oas1; 2'-5'-oligoadenylate synthase-like protein 1                        | 1.21 | 0.0217 |
| P01628     | N/A; Ig kappa chain V-II region MOPC 511                                  | 0.59 | 0.0388 |
| B3VKY5     | AY761184; CRS1C-6 (Fragment)                                              | 0.82 | 0.0007 |
| P35230     | Reg3b; Regenerating islet-derived protein 3-beta                          | 0.58 | 0.0014 |
| A0A097PUD0 | N/A; Anti-dectin-1 15E2 light chain                                       | 1.25 | 0.0301 |
| P52430     | Pon1; Serum paraoxonase/arylesterase 1                                    | 0.83 | 0.0055 |
| P18531     | Ighv3-6; Ig heavy chain V region 3-6                                      | 1.44 | 0.0311 |
| Q8BY35     | Fgd2; FYVE, RhoGEF and PH domain-containing protein 2                     | 0.80 | 0.0425 |
| A0A140T8P6 | Igkv12-46; Immunoglobulin kappa variable 12-46 (Fragment)                 | 0.72 | 0.0031 |
| Q5DTG2     | Col3a1; MKIAA4231 protein (Fragment)                                      | 0.80 | 0.0275 |
| D3Z689     | Adamts15; ADAMTS-like 5                                                   | 1.23 | 0.0224 |
| P20065     | Tmsb4x; Thymosin beta-4                                                   | 0.80 | 0.0245 |
| Q99JI1     | Mustn1; Musculoskeletal embryonic nuclear protein 1                       | 0.76 | 0.0437 |
| Q9WTR1     | Trpv2; Transient receptor potential cation channel subfamily V member 2   | 0.73 | 0.0395 |
| Q9WV38     | Slc2a5; Solute carrier family 2, facilitated glucose transporter member 5 | 1.20 | 0.0437 |
| A0A0B4J1I9 | Igkv4-55; Immunoglobulin kappa variable 4-55 (Fragment)                   | 1.41 | 0.0025 |
| Q3UNJ7     | B3gnt3; Hexosyltransferase                                                | 0.75 | 0.0248 |
| Q9CY52     | Thg1l; Probable tRNA(His) guanylyltransferase                             | 0.82 | 0.0259 |
| Q545V6     | Sst; Putative uncharacterized protein                                     | 0.81 | 0.0070 |
| Q922F6     | N/A; Putative uncharacterized protein                                     | 0.48 | 0.0151 |
| Q3TWR1     | Traf2; Putative uncharacterized protein                                   | 0.81 | 0.0121 |
| Q80ZM7     | Gtf2a2; Transcription initiation factor IIA subunit 2                     | 0.81 | 0.0427 |
| A0A0R4J291 | Fastkd5; FAST kinase domain-containing protein 5, mitochondrial           | 0.82 | 0.0344 |
| B2RPV6     | Mmrn1; Multimerin-1                                                       | 1.21 | 0.0152 |
| P60761     | Nrgn; Neurogranin                                                         | 0.79 | 0.0014 |

|            |                                                                                        |      |        |
|------------|----------------------------------------------------------------------------------------|------|--------|
| A0A1S6GWI2 | Tmem258; Uncharacterized protein                                                       | 0.81 | 0.0095 |
| Q5SS00     | Zdbf2; DBF4-type zinc finger-containing protein 2 homolog                              | 0.81 | 0.0379 |
| F8WGQ9     | Kctd10; BTB/POZ domain-containing adapter for CUL3-mediated RhoA degradation protein 3 | 0.78 | 0.0162 |
| G5E8C6     | Vill; Villin-like protein                                                              | 0.39 | 0.0002 |
| F7C0E4     | Atxn7l1; Ataxin-7-like protein 1 (Fragment)                                            | 1.44 | 0.0372 |

<sup>a</sup>The accession ID of each protein in the Uniprot database. <sup>b</sup>The gene name and protein description of each protein in the Uniprot database. <sup>c</sup>The fold change value of each differentially expressed protein in the 0.40-SeM/0.40-SeL comparison. <sup>d</sup>Differences in protein abundances between the 0.40-SeM and 0.40-SeL groups were analyzed using one-way analysis of variance, followed by the Tukey's post hoc test.  $P < 0.05$  was considered as significant. The value 0 indicates  $P < 0.0001$ .
